# Supplementary material for: Primary care physicians’ attitudes and perceptions towards antibiotic resistance and outpatient antibiotic stewardship in the USA: a qualitative study
Source: PubMed Central journal article supplement — BMJ Open. 2020 Jul 14;10(7):e034983. doi: 10.1136/bmjopen-2019-034983 (PMC7365421; doi:10.1136/bmjopen-2019-034983), 2020-07-14
Supplement: bmjopen-2019-034983.draft_revisions.pdf [file bmjopen-2019-034983.draft_revisions.pdf]

# BMJ Open

BMJ Open is committed to open peer review. As part of this commitment we make the peer review history of every article we publish publicly available.

When an article is published we post the peer reviewers' comments and the authors' responses online. We also post the versions of the paper that were used during peer review. These are the versions that the peer review comments apply to.

The versions of the paper that follow are the versions that were submitted during the peer review process. They are not the versions of record or the final published versions. They should not be cited or distributed as the published version of this manuscript.

BMJ Open is an open access journal and the full, final, typeset and author-corrected version of record of the manuscript is available on our site with no access controls, subscription charges or pay-per-view fees (<http://bmjopen.bmj.com>).

If you have any questions on BMJ Open's open peer review process please email [info.bmjopen@bmj.com](mailto:info.bmjopen@bmj.com)

# BMJ Open

## Primary Care Physicians' Attitudes and Perceptions toward Antibiotic Resistance and Outpatient Antibiotic Stewardship: A Qualitative Study

|                               |                                                                                                                                                                                                                                                                                                                                                                                                                                                    |
|-------------------------------|----------------------------------------------------------------------------------------------------------------------------------------------------------------------------------------------------------------------------------------------------------------------------------------------------------------------------------------------------------------------------------------------------------------------------------------------------|
| Journal:                      | <i>BMJ Open</i>                                                                                                                                                                                                                                                                                                                                                                                                                                    |
| Manuscript ID                 | bmjopen-2019-034983                                                                                                                                                                                                                                                                                                                                                                                                                                |
| Article Type:                 | Original research                                                                                                                                                                                                                                                                                                                                                                                                                                  |
| Date Submitted by the Author: | 14-Oct-2019                                                                                                                                                                                                                                                                                                                                                                                                                                        |
| Complete List of Authors:     | Zetts, Rachel; PEW Charitable Trusts<br>Stoesz, Andrea; PEW Charitable Trusts<br>Garcia, Andrea; American Medical Association<br>Doctor, Jason; University of Southern California Sol Price School of Public Policy<br>Gerber, Jeffrey S.; Children's Hospital of Philadelphia<br>Linder, Jeffrey; Northwestern University Feinberg School of Medicine, Division of General Internal Medicine and Geriatrics<br>Hyun, David; PEW Charitable Trusts |
| Keywords:                     | Quality in health care < HEALTH SERVICES ADMINISTRATION & MANAGEMENT, INFECTIOUS DISEASES, PRIMARY CARE, PUBLIC HEALTH, QUALITATIVE RESEARCH                                                                                                                                                                                                                                                                                                       |
|                               |                                                                                                                                                                                                                                                                                                                                                                                                                                                    |

SCHOLARONE™  
Manuscripts

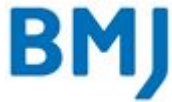

I, the Submitting Author has the right to grant and does grant on behalf of all authors of the Work (as defined in the below author licence), an exclusive licence and/or a non-exclusive licence for contributions from authors who are: i) UK Crown employees; ii) where BMJ has agreed a CC-BY licence shall apply, and/or iii) in accordance with the terms applicable for US Federal Government officers or employees acting as part of their official duties; on a worldwide, perpetual, irrevocable, royalty-free basis to BMJ Publishing Group Ltd ("BMJ") its licensees and where the relevant Journal is co-owned by BMJ to the co-owners of the Journal, to publish the Work in this journal and any other BMJ products and to exploit all rights, as set out in our [licence](#).

The Submitting Author accepts and understands that any supply made under these terms is made by BMJ to the Submitting Author unless you are acting as an employee on behalf of your employer or a postgraduate student of an affiliated institution which is paying any applicable article publishing charge ("APC") for Open Access articles. Where the Submitting Author wishes to make the Work available on an Open Access basis (and intends to pay the relevant APC), the terms of reuse of such Open Access shall be governed by a Creative Commons licence – details of these licences and which [Creative Commons](#) licence will apply to this Work are set out in our licence referred to above.

Other than as permitted in any relevant BMJ Author's Self Archiving Policies, I confirm this Work has not been accepted for publication elsewhere, is not being considered for publication elsewhere and does not duplicate material already published. I confirm all authors consent to publication of this Work and authorise the granting of this licence.

1  
2  
3 **Title:** Primary Care Physicians' Attitudes and Perceptions toward Antibiotic Resistance and  
4 Outpatient Antibiotic Stewardship: A Qualitative Study  
5

6 **Authors:** Rachel M. Zetts, MPH<sup>1</sup>, Andrea Stoesz, MPH<sup>1</sup>, Andrea M. Garcia, JD, MPH<sup>2</sup>, Jason N.  
7 Doctor, PhD<sup>3</sup>, Jeffrey S. Gerber, MD, PhD<sup>4</sup>, Jeffrey A. Linder, MD, MPH<sup>5</sup>, David Y. Hyun, MD<sup>1</sup>  
8  
9

10 **Affiliations:** <sup>1</sup>The Pew Charitable Trusts, Washington, DC, USA  
11 <sup>2</sup>American Medical Association, Chicago, USA  
12 <sup>3</sup>Department of Health Policy and Management, Sol Price School of Public Policy,  
13 University of Southern California, Los Angeles, USA  
14 <sup>4</sup>Division of Infectious Diseases, Children's Hospital of Philadelphia, Philadelphia,  
15 USA  
16 <sup>5</sup>Division of General Internal Medicine and Geriatrics, Northwestern University  
17 Feinberg School of Medicine, Chicago, USA  
18  
19

20 **Address correspondence to:** Ms. R.M. Zetts, Officer, Antibiotic Resistance Project, The Pew  
21 Charitable Trusts, 901 E Street, NW, Washington, DC, 20004, USA, 202-540-6557,  
22 [rzetts@pewtrusts.org](mailto:rzetts@pewtrusts.org)  
23  
24

25 **Abstract Word Count:** 285  
26

27 **Article Word Count:** 2,898  
28

29 **Number of Tables:** 4  
30

31 **Keywords:** antibiotic resistance, antibiotics, antimicrobial stewardship, primary care, qualitative  
32 research  
33  
34  
35  
36  
37  
38  
39  
40  
41  
42  
43  
44  
45  
46  
47  
48  
49  
50  
51  
52  
53  
54  
55  
56  
57  
58  
59  
60

**Abstract:**

**Objectives:** At least 30% of outpatient antibiotic prescriptions are unnecessary. Outpatient antibiotic stewardship is needed to improve prescribing and address the threat of antibiotic resistance. A better understanding of primary care physicians' (PCPs) attitudes towards antibiotic prescribing and outpatient antibiotic stewardship is needed to identify barriers to stewardship implementation and help tailor stewardship strategies. The aim of this study was to assess PCPs' current attitudes towards antibiotic resistance, inappropriate antibiotic prescribing, and the feasibility of outpatient stewardship efforts.

**Design:** Eight focus groups were conducted with PCPs in 4 U.S. cities: Philadelphia, Birmingham, Chicago, and Los Angeles – one with family medicine/internal medicine physicians and one with pediatricians in each city. An independent moderator conducted each focus group using a moderator guide. Focus groups were audio-recorded, transcribed, and coded for major themes using deductive and inductive content analysis methods.

**Results:** Twenty-six family medicine/internal medicine physicians and 26 pediatricians participated. Participants acknowledged that resistance is an important public health issue, but not as important as other pressing problems (e.g., obesity, opioids). Many considered resistance to be more of a hospital issue. While participants recognized inappropriate prescribing as a problem in outpatient settings, many felt that the key drivers were non-primary care settings (e.g., urgent care clinics, retail clinics) and patient demand. Participants reacted positively to stewardship efforts aimed at educating patients and clinicians. They questioned the validity of antibiotic prescribing metrics. This skepticism was due to a number of factors, including the feasibility of capturing prescribing quality, a belief that physicians will “game the system” to improve their measures, and dissatisfaction and distrust of quality measurement in general.

1  
2  
3 **Conclusions:** Stakeholders will need to consider physician attitudes and beliefs about antibiotic  
4  
5 stewardship when implementing interventions aimed at improving prescribing.  
6  
7

8  
9  
10 **Strengths and limitations of this study**  
11

- 12  
13  
14  
15  
16  
17  
18  
19  
20  
21  
22  
23  
24  
25  
26  
27  
28  
29  
30  
31  
32  
33  
34  
35  
36  
37  
38  
39  
40  
41  
42  
43  
44  
45  
46  
47  
48  
49  
50  
51  
52  
53  
54  
55  
56  
57  
58  
59  
60
- This study presents new data on U.S.-based primary care physicians' attitudes towards antibiotic resistance, inappropriate antibiotic prescribing, and outpatient antibiotic stewardship approaches.
  - Eight focus groups with internal medicine physicians, family medicine physicians, and pediatricians were held in four geographically-dispersed U.S. cities, which allowed for a wide-range of viewpoints to be represented in the dataset.
  - The focus groups did not include all types of clinicians that provide primary care in the U.S. (e.g., nurse practitioners, physician assistants).
  - Although physicians from across the U.S. were included in this study, the small sample size limits the generalizability of these findings.

## Introduction

Antibiotic resistance poses a growing threat to public health and antibiotic use is a primary driver of the development of resistant bacteria. In the United States, the majority of antibiotics used in humans are prescribed in outpatient healthcare settings.(1) Considering the volume of antibiotics prescribed and data from other countries, ambulatory antibiotic prescribing probably accounts for 80-90% of all antibiotic prescribing.(2,3)

There were 270.2 million outpatient antibiotic prescriptions dispensed in 2016.(4) While this represents a 5% decrease since 2011, prescribing rates have been relatively stable from 2014-2016.(4) The largest proportion of prescriptions in 2016 (39%) were written by primary care physicians (PCPs).(5) Previous studies have found that a significant proportion of outpatient antibiotic prescriptions are inappropriate.(6-10) Many of these inappropriate prescriptions were for acute respiratory conditions that often do not require antibiotics.(6,8-9)

To address this overuse, the Centers for Disease Control and Prevention (CDC) published core elements of antibiotic stewardship in outpatient settings, highlighting steps that stakeholders can take in support of stewardship efforts.(11) However, additional work is needed to ensure outpatient stewardship efforts are expanded nationwide.

A better understanding of physicians' attitudes towards antibiotic prescribing and their perceptions on the feasibility and impact of stewardship interventions is needed to identify barriers to stewardship implementation in U.S. ambulatory settings and to allow stakeholders to better tailor

1  
2  
3 strategies to improve prescribing. In order to assess these attitudes among outpatient physicians,  
4  
5 we conducted a series of semi-structured focus groups among PCPs in the United States.  
6  
7  
8  
9

## 10 **Methods**

### 11 *Study Design*

12  
13  
14  
15  
16  
17  
18  
19 We conducted eight focus groups in November and December of 2017 with PCPs in four U.S.  
20  
21 cities – Philadelphia, PA; Birmingham, AL; Chicago, IL; and Los Angeles, CA. These cities were  
22  
23 selected to represent each of the four U.S. Census regions in order to account for any potential  
24  
25 differences in attitudes based on geographic region. Research has shown clear differences in  
26  
27 overall outpatient antibiotic prescribing rates by geographic region.(4) Additionally, the majority  
28  
29 of primary care physicians in the U.S. specialize in family medicine, internal medicine, or  
30  
31 pediatrics. As such, two focus groups were conducted in each city – one with family medicine and  
32  
33 internal medicine physicians and one with pediatricians.  
34  
35  
36  
37  
38  
39

40 A screening questionnaire was developed to recruit participants. Inclusion criteria included self-  
41  
42 report of board certification in pediatrics, family medicine, or internal medicine; being a full-time  
43  
44 physician primarily practicing in an outpatient office setting; spending  $\geq 50\%$  of medical practice  
45  
46 time in direct patient care; and fluency in English. Participants were excluded if they reported  
47  
48 being  $> 65$  years-old; board-certified in a subspecialty outside of primary care; or an employee or  
49  
50 paid consultant of any of the following organizations: a pharmaceutical, medical device, or  
51  
52  
53  
54  
55  
56  
57  
58  
59  
60



1  
2  
3 biotechnology company, an advertising or healthcare marketing company, or a governmental or  
4  
5 regulatory agency.  
6  
7  
8  
9

10 Study participants were recruited by M3 Global Research, a medical market research firm.  
11  
12 Participants were initially recruited from a panel of healthcare professionals maintained by M3.  
13  
14 For three cities – Chicago, Birmingham, and Los Angeles – additional participants were recruited  
15  
16 from physician panels maintained by local partners to ensure adequate participation. Individuals  
17  
18 located within a 30-mile radius of each focus group facility were contacted by telephone or online  
19  
20 and screened for participation in this study. Any participant recruited online received a follow-up  
21  
22 call from M3 to confirm their eligibility.  
23  
24  
25  
26  
27

28 Each focus group lasted between 1.5 and 2 hours and was moderated by the same independent  
29  
30 moderator with experience in qualitative research. Prior to each focus group, participants received  
31  
32 an informed consent form to review and sign. Each participant received \$400 to compensate for  
33  
34 their time.  
35  
36  
37  
38  
39

40 This study was reviewed and deemed exempt by the Chesapeake IRB (now known as Advarra).  
41  
42  
43

#### 44 *Data Collection and Analysis* 45 46 47 48

49 The study team and the external moderator developed a semi-structured moderator guide (see  
50  
51 Supplementary Data). The guide began by asking participants to rank a number of public health  
52  
53 issues in terms of importance in their daily practice. These issues included excess body weight and  
54  
55  
56  
57  
58  
59  
60

1  
2  
3 obesity, antibiotic resistance, misinformation about childhood vaccines (pediatricians only), opioid  
4 abuse, diabetes, patient non-compliance with drug regimens, and smoking/tobacco use.  
5  
6  
7

8  
9  
10 The guide then asked questions aimed at understanding the physicians' attitudes and perceptions  
11 around antibiotic use and stewardship, including factors that influence their antibiotic prescribing  
12 decisions and if/how they communicate with patients about these decisions. They were also given  
13 handouts that defined and provided examples of the CDC's Core Elements of Outpatient Antibiotic  
14 Stewardship.<sup>(11)</sup> These handouts were used to gauge perceptions on the feasibility and impact of  
15 the core elements and associated activities.  
16  
17  
18  
19  
20  
21  
22

23  
24  
25  
26 Finally, participants were asked for feedback on activities that encourage antibiotic stewardship  
27 implementation and resource availability to do so. Respondents provided opinions on the  
28 feasibility and effectiveness of example policies and activities that could be implemented by  
29 healthcare stakeholders to encourage stewardship implementation. To assess resource availability,  
30 participants were asked to provide feedback on current access to certain tools to support antibiotic  
31 stewardship efforts, such as feedback reports on antibiotic prescribing practices or access to patient  
32 education materials and, if not, how much of a burden it would be to obtain access.  
33  
34  
35  
36  
37  
38  
39  
40  
41  
42  
43

44 All focus groups were audio and video-recorded, transcribed, and coded for major themes in  
45 NVivo 11 (QSR International). Common themes were identified by three study authors (RZ, AS,  
46 DH), using both deductive and inductive content analysis methods.<sup>(12)</sup> An initial list of themes  
47 was identified based on current literature and the authors' familiarity with the focus group  
48 discussions. The initial themes were then modified and additional themes were added through  
49  
50  
51  
52  
53  
54  
55  
56  
57  
58  
59  
60

1  
2  
3 further review of the transcripts. Themes were independently coded by two authors (RZ, AS) and  
4 reviewed by another author (DH), and any disagreement in coding was discussed until consensus  
5 was met.  
6  
7  
8  
9

### 10 11 12 *Patient and Public Involvement*

13  
14 This research was done without patient involvement. Patients were not invited to comment on the  
15 study design and were not consulted to develop patient relevant outcomes or interpret the results.  
16  
17 Patients were not invited to contribute to the writing or editing of this document for readability or  
18 accuracy.  
19  
20  
21  
22  
23

### 24 25 26 **Results**

27  
28  
29  
30 A total of 52 PCPs – 26 family medicine and internal medicine physicians and 26 pediatricians –  
31 participated in the focus groups. A number of common themes were identified across these focus  
32 groups that illustrated attitudes around antibiotic resistance as a public health issue, drivers of  
33 antibiotic prescribing, and the acceptability of different antibiotic stewardship interventions  
34  
35  
36  
37  
38  
39  
40 **(Tables 1-4).**  
41  
42  
43

### 44 45 *Antibiotic Resistance as a Public Health Issue*

46  
47  
48  
49 *Antibiotic resistance seen as less important than other public health issues* A common theme  
50 among focus group participants was the perception of antibiotic resistance being less important in  
51  
52  
53  
54  
55  
56  
57  
58  
59  
60

1  
2  
3 their daily practice when compared with other public health issues they commonly faced, such as  
4  
5 obesity, diabetes, and opioid misuse.  
6  
7  
8  
9

10 *Antibiotic resistance is an issue, but not for my patient population* While many participants  
11  
12 acknowledged that antibiotic resistance is a concern, many did not see it as an issue that impacted  
13  
14 their patients or their daily practice. Instead, many considered antibiotic resistance as something  
15  
16 affecting sicker, hospitalized patients. Some participants acknowledged that they have seen an  
17  
18 increase in resistant infections in their patients with urinary tract infections or skin infections.  
19  
20 However, they still classified resistance as an issue largely impacting inpatient medicine.  
21  
22  
23  
24  
25

### 26 *Drivers of Antibiotic Prescribing*

27  
28  
29  
30

31 *Externalized responsibility for inappropriate antibiotic prescribing* Another theme was the belief  
32  
33 that inappropriate outpatient antibiotic prescribing is largely driven by clinicians other than  
34  
35 themselves, namely those practicing in urgent care offices and retail clinics. This contributed to  
36  
37 the feeling that resisting patient demand for antibiotics is futile, as patients can simply see another  
38  
39 clinician and get what they want. Participants also believed patients' past experiences of receiving  
40  
41 antibiotics from another clinician when they presented with similar symptoms reinforced patient  
42  
43 expectations for antibiotics – making it harder for them to counteract patient demands.  
44  
45  
46  
47  
48

49 *Patient demand as a driving factor* When discussing drivers of antibiotic prescribing habits, a  
50  
51 common theme was the pressure participants experience from patients who the prescribers  
52  
53 perceive to expect antibiotics even when not medically indicated. Participants believed that  
54  
55  
56  
57  
58  
59  
60

1  
2  
3 patients often feel entitled to leave a visit with a material treatment – often an antibiotic - after  
4  
5 spending time and money at a doctor’s office. Participants argued that patient pressure is  
6  
7 compounded by the use of patient satisfaction scores when grading physician performance. They  
8  
9 expressed concern that, if they refused to prescribe an antibiotic for a patient who expected one,  
10  
11 that the patient might write a negative review and/or score the physician poorly.  
12  
13  
14  
15

16  
17 Some participants indicated that the impact of patient expectations for antibiotics on their  
18  
19 prescribing decisions can vary. For example, participants indicated that they may be more willing  
20  
21 to push back against prescribing an antibiotic if they have a long-standing relationship with a  
22  
23 patient. This was common among pediatricians as many of them indicated they have many  
24  
25 opportunities to interact with patients and their parents during well child visits, making it easier  
26  
27 for them to discuss why an antibiotic is or is not needed with parents.  
28  
29  
30  
31  
32

### 33 *Antibiotic Stewardship – Patient and Provider Education*

34  
35  
36  
37

38 *Need for patient education* Consistent with their concerns around perceived patient demand for  
39  
40 antibiotics, participants emphasized that, in order for them to be able to effectively do their jobs,  
41  
42 their patients need to be educated about when antibiotics are and are not appropriate and why  
43  
44 judicious antibiotic use is critical to combating antibiotic resistance. Participants suggested several  
45  
46 approaches for educating the public, including written education materials in different languages,  
47  
48 educational videos for waiting rooms, and direct-to-consumer advertisements. Finally, many  
49  
50 physicians emphasized the need to provide education in advance of a patient visit. By the time a  
51  
52 patient is at a doctor’s office for an illness, many felt it was too late to change patient expectations.  
53  
54  
55  
56  
57  
58  
59  
60

1  
2  
3  
4  
5  
6 *Acceptability of physician education* Many participants indicated that physician education would  
7  
8 also be a welcome approach for outpatient antibiotic stewardship. Educational efforts were viewed  
9  
10 as more helpful for physicians compared to other interventions, such as providing feedback on  
11  
12 prescribing practices, which was viewed as more critical of physicians. For example, participants  
13  
14 indicated that training in how to communicate antibiotic prescribing decisions to patients would  
15  
16 be helpful. A few participants mentioned that requiring outpatient physicians to complete  
17  
18 continuing medical education (CME) on antibiotic use – similar to requirements for CME around  
19  
20 opioid prescribing – may be helpful. However, other participants indicated that they would prefer  
21  
22 voluntary rather than mandatory CME.  
23  
24  
25  
26  
27

### 28 *Antibiotic Stewardship – Measuring Antibiotic Prescribing*

29  
30  
31  
32  
33 *Feasibility of measuring antibiotic prescribing* Participants expressed concerns about antibiotic  
34  
35 stewardship activities focused on measuring inappropriate antibiotic use, questioning the  
36  
37 feasibility of assessing prescribing quality while accounting for different patient populations.  
38  
39 Some participants indicated that developing antibiotic use reports would likely require significant  
40  
41 financial and time investments. Many participants argued that antibiotic use measures are unlikely  
42  
43 to capture all of the clinical elements from an office visit to provide the full context behind an  
44  
45 antibiotic prescription, and that setting standards for the quality of antibiotic use would be  
46  
47 difficult. Some questioned who would be qualified to set these standards and how that might  
48  
49 impact the accuracy and fairness of antibiotic use measures.  
50  
51  
52  
53  
54  
55  
56  
57  
58  
59  
60

1  
2  
3 *Belief that physicians will “game the system”* Participants also argued that, if antibiotic use  
4 measures were developed and implemented, other physicians would simply “game the system” to  
5 improve their antibiotic prescribing scores. Many believed that physicians could easily identify  
6 what diagnosis codes they were being measured on and shift coding practices to more antibiotic-  
7 appropriate conditions.  
8  
9  
10  
11  
12  
13

14  
15  
16  
17 *Dissatisfaction with the quality measurement system* Many participants also expressed  
18 dissatisfaction and general distrust of quality measurement systems and reporting processes.  
19 Participants often expressed a sense of feeling over-measured and being blamed for things beyond  
20 their control. Participants argued that quality measures assume that medicine is black and white  
21 and do not account for their need to use clinical judgment when treating patients. Some expressed  
22 concern that any new measure could eventually be turned around and used against them.  
23  
24  
25  
26  
27  
28  
29  
30

31  
32  
33 *Distrust of tracking and reporting systems* Finally, participants highlighted issues that they have  
34 experienced with the inaccuracy of tracking and reporting systems. For example, participants  
35 indicated that they often receive feedback reports that include patients that they have not seen in  
36 years, or feedback reports with clear coding errors. These inaccuracies lead them to generally  
37 dismiss the utility of these reports.  
38  
39  
40  
41  
42  
43  
44  
45

## 46 **Discussion**

47  
48  
49  
50  
51 We conducted focus groups with PCPs to assess their knowledge and attitudes towards antibiotic  
52 resistance, inappropriate antibiotic prescribing, and outpatient antibiotic stewardship approaches.  
53  
54  
55  
56  
57  
58  
59  
60

1  
2  
3 While participants recognized the public health importance of antibiotic resistance and antibiotic  
4 use, they felt these issues were less important compared to other public health priorities in  
5 outpatient care. Most participants felt they were already good antibiotic stewards, but that their  
6 efforts were hindered by patient demand for antibiotics and the prescribing practices of other  
7 physicians. They also remain skeptical about the feasibility and effectiveness of different  
8 stewardship activities. While participants reacted positively to patient and physician education,  
9 many remained unconvinced about the utility of antibiotic use tracking and reporting.  
10  
11  
12  
13  
14  
15  
16  
17  
18  
19  
20

21 Participants' negative attitudes regarding the feasibility of measuring the quality of antibiotic use  
22 in an accurate or fair manner, and their distrust of the quality measurement system in general  
23 factored into participants' perceptions on the impact of antibiotic use measurement as a  
24 stewardship strategy. Some recognized that it could have a beneficial impact on prescribing  
25 decisions – particularly if measurement activities focused on physicians who were high prescribers  
26 or if the measures were provided for self-evaluation. However, others felt that antibiotic use  
27 measures would be ineffective and ripe for micromanagement by external stakeholders, or that the  
28 results would not provide them with enough information to improve their prescribing.  
29  
30  
31  
32  
33  
34  
35  
36  
37  
38  
39  
40  
41

42 Some of our findings are consistent with previous studies. Past research has consistently shown  
43 that physicians consider patient demand and prescribing of other physicians to be primary drivers  
44 of inappropriate antibiotic prescribing.(13-20) Our study highlights that these factors continue to  
45 be a concern for PCPs. Additionally, two interview-based studies of primary care clinicians in the  
46 UK and Europe showed a general recognition that antibiotic resistance is an important issue, but  
47 many were less concerned about resistance in their daily practice.(21, 22) However, one study of  
48  
49  
50  
51  
52  
53  
54  
55  
56  
57  
58  
59  
60



1  
2  
3 primary care clinicians in the U.S. found that their participants expressed considerable concern  
4 about availability of antibiotics in the future as resistance increases.(13) Our study adds to these  
5 findings by placing antibiotic resistance within the broader context of public health issues. Our  
6 participants consistently identified antibiotic resistance as a lower priority for their practice  
7 compared to other health concerns.  
8  
9  
10  
11  
12  
13  
14  
15  
16

17 Regarding antibiotic use measurement, a previous study evaluated pediatrician perceptions of an  
18 intervention that included audit and feedback of antibiotic prescribing practices.(14) Study authors  
19 found high skepticism among their physicians about the quality and accuracy of the feedback  
20 reports, with one physician admitting to “gaming the system” by using bacterial diagnoses to avoid  
21 negative reports. Additional studies have evaluated physician perceptions of the broader quality  
22 measurement system. One study of U.S. physicians in three states found that 71% felt that pediatric  
23 quality reports were effective at improving pediatric care.(23) However, in interviews with  
24 providers in two of these states, authors found that physicians were frustrated with certain aspects  
25 of the quality reports, such as the inclusion of measures that they felt were outside of their  
26 control.(23) A 2009 survey of U.S. physicians on perceptions of Medicare’s Physician Quality  
27 Reporting Initiative (PQRI) found that 50% of physicians participating in PQRI programs believed  
28 it had no impact on quality of care.(24)  
29  
30  
31  
32  
33  
34  
35  
36  
37  
38  
39  
40  
41  
42  
43  
44  
45  
46

47 Many of our findings are consistent with research on self-enhancement bias—that people take full  
48 credit for their success but are quick to dismiss failures as caused by external factors.(25,26) Self-  
49 enhancement is adaptive because it protects against being discouraged or down on one’s self,  
50 preserves a person’s self-image, and keeps them motivated to work and thrive in their life. This  
51  
52  
53  
54  
55  
56  
57  
58  
59  
60

1  
2  
3 may explain findings from our focus groups, including: (1) the physicians' belief that patients'  
4 antibiotic knowledge deficits and other clinicians' behaviors were key drivers of overprescribing,  
5  
6 and (2) their defensive responses when confronted with the potential for reports of their own  
7  
8 prescribing by questioning the validity of the measurement enterprise. These perceptions present  
9  
10 a challenge when addressing inappropriate antibiotic prescribing. Some approaches that have been  
11  
12 successful in reducing antibiotic overprescribing invert the problem of self-enhancement by using  
13  
14 it as a way to encourage or reward appropriate prescribing. These interventions engender  
15  
16 reputational concerns when antibiotics are used or make explicit social comparisons of  
17  
18 performance with others to encourage pursuit of a positive self-image (e.g., the prospect of  
19  
20 becoming a "top performer") through lower prescribing.(27,28)  
21  
22  
23  
24  
25  
26  
27

28 This study has limitations. Because this is a qualitative study with a small sample size, these  
29  
30 findings cannot be generalized to the broader PCP population. Participants were drawn from  
31  
32 physician databases maintained for research purposes. Physicians who were recruited and who  
33  
34 participated in these focus groups may have different or stronger opinions than those who did not.  
35  
36 Finally, this study evaluated physicians who specialized in family medicine, internal medicine, or  
37  
38 pediatrics. We did not include other primary care clinicians, such as nurse practitioners or  
39  
40 physician assistants. Additional research will be needed to assess whether these findings are  
41  
42 applicable to the broader primary care clinician community.  
43  
44  
45  
46  
47  
48

49 In conclusion, the findings from these focus groups show that more work is needed to elevate the  
50  
51 issue of antibiotic resistance and the need for improved prescribing among PCPs. Additionally,  
52  
53 current skepticism among PCPs about the feasibility and accuracy of antibiotic use measurement  
54  
55  
56  
57  
58  
59  
60

1  
2  
3 may create concern around interventions that rely solely on tracking and reporting prescribing. It  
4  
5 will be important to address these perceptions when designing interventions aimed at decreasing  
6  
7 inappropriate antibiotic prescribing in outpatient settings.  
8  
9

10  
11 **Funding Statement:** This research received no specific grant from any funding agency in the  
12 public, commercial, or not-for-profit sectors.  
13

#### 14 **Conflict of Interest**

15  
16  
17 Dr. Linder, Dr. Gerber, and Dr. Doctor all received honoraria for time dedicated to this research  
18 project. Dr. Doctor has received consultant fees from Precision Health Economics and University  
19 of Pennsylvania Health System. Dr. Linder was supported by grants from the National Institute on  
20 Aging (R21AG057400, R21AG057396, R21AG057383), National Institute on Drug Abuse  
21 (R21AG057395), Agency for Healthcare Research and Quality (R01HS024930, R01HS026506),  
22 The Peterson Center on Healthcare, and a contract from the Agency for Healthcare Research and  
23 Quality (HHSP2332015000201).  
24  
25

#### 26 **Contributors' Statement**

27  
28 Ms. Zetts led the development of the study concept and design, participated in the analysis and  
29 interpretation of data, and drafted the manuscript.  
30

31  
32 Ms. Stoesz participated in the analysis and interpretation of data and provided critical revision of  
33 the manuscript.  
34

35  
36 Ms. Garcia provided input in the development of the study concept and design, participated in the  
37 interpretation of data, and provided critical revision of the manuscript.  
38

39  
40 Dr. Doctor provided input in the development of the study concept and design, participated in the  
41 interpretation of data, and provided critical revision of the manuscript.  
42

43  
44 Dr. Gerber provided input in the development of the study concept and design, participated in the  
45 interpretation of data, and provided critical revision of the manuscript.  
46

47  
48 Dr. Linder provided input in the development of the study concept and design, participated in the  
49 interpretation of data, and provided critical revision of the manuscript.  
50

51  
52 Dr. Hyun provided supervision in the development of the study concept and design, participated  
53 in the analysis and interpretation of data, and provided critical revision of the manuscript.  
54  
55  
56  
57  
58  
59  
60

## References

1. Suda KJ, Hicks LA, Roberts RM, Hunkler RJ, Matusiak LM, Schumock GT. Antibiotic Expenditures by Medication, Class, and Health Care Setting in the United States, 2010-2015. *Clin Infect Dis*. 2018;66(2):185-190. doi:10.1093/cid/cix773.
2. Public Health England. English Surveillance Programme for Antimicrobial Utilisation and Resistance (ESPAUR): report 2014. [https://www.gov.uk/government/uploads/system/uploads/attachment\\_data/file/362374/ESPAUR\\_Report\\_2014\\_3.pdf](https://www.gov.uk/government/uploads/system/uploads/attachment_data/file/362374/ESPAUR_Report_2014_3.pdf). Accessed April 18, 2019.
3. Public Health Agency of Sweden, National Veterinary Institute. Consumption of antibiotics and occurrence of antibiotic resistance in Sweden. Swedres-Svarm 2014. Report No.: ISSN 1650-6332. <https://www.folkhalsomyndigheten.se/pagefiles/20281/Swedres-Svarm-2014-14027.pdf>. Accessed April 18, 2019.
4. King LM, Bartoces M, Fleming-Dutra KE, Roberts RM, Hicks LA. Changes in US Outpatient Antibiotic Prescriptions from 2011-2016. *Clin Infect Dis*. 2019. doi:10.1093/cid/ciz225.
5. Centers for Disease Control and Prevention. Outpatient antibiotic prescriptions—United States, 2016. <https://www.cdc.gov/antibiotic-use/community/programs-measurement/state-local-activities/outpatient-antibiotic-prescriptions-US-2016.html>. Accessed April 18, 2019.
6. Fleming-Dutra KE, Hersh AL, Shapiro DJ, et al. Prevalence of inappropriate antibiotic prescriptions among US ambulatory care visits, 2010-2011. *JAMA*. 2016;315(17):1864-1873. doi:10.1001/jama.2016.4151.
7. Hersh AL, Fleming-Dutra KE, Shapiro DJ, Hyun DY, Hicks LA. Frequency of First-line Antibiotic Selection Among US Ambulatory Care Visits for Otitis Media, Sinusitis, and Pharyngitis. *JAMA Intern Med*. 2016;176(12):1870-1872. doi:10.1001/jamainternmed.2016.6625.
8. Chua KP, Fischer MA, Linder JA. Appropriateness of outpatient antibiotic prescribing among privately insured US patients: ICD-10-CM based cross sectional study. *BMJ*. 2019;364:k5092. doi:10.1136/bmj.k5092.
9. Palms DL, Hicks LA, Bartoces M, et al. Comparison of Antibiotic Prescribing in Retail Clinics, Urgent Care Centers, Emergency Departments, and Traditional Ambulatory Care Settings in the United States. *JAMA Intern Med*. 2018;178(9):1267-1269. doi:10.1001/jamainternmed.2018.1632
10. Fischer MA, Mahersi M, Lii J, Linder JA. Invisible threats to improving antibiotic use: non-infection-related and non-visit-based antibiotic prescribing for Medicaid patients. *Health Aff*. 2019; in press.
11. Centers for Disease Control and Prevention. The Core Elements of Outpatient Antibiotic Stewardship. <https://www.cdc.gov/antibiotic-use/community/improving-prescribing/core-elements/core-outpatient-stewardship.html>. Published 2016. Accessed November 11, 2018.
12. Elo S, Kyngäs H. The qualitative content analysis process. *J Adv Nurs*. 2008;62(1):107-115. doi:10.1111/j.1365-2648.2007.04569.x.
13. Sanchez GV, Roberts RM, Albert AP, Johnson DD, Hicks LA. Effects of knowledge, attitudes, and practices of primary care providers on antibiotic selection, United States. *Emerg Infect Dis*. 2014;20(12):2041-2047. doi:10.3201/eid2012.140331.
14. Szymczak JE, Feemster KA, Zaoutis TE, Gerber JS. Pediatrician perceptions of an outpatient antimicrobial stewardship intervention. *Infect Control Hosp Epidemiol*. 2014;35(suppl 3):S69-S78. doi:10.1086/677826.

15. Petursson P. GPs' reasons for "non-pharmacological" prescribing of antibiotics. A phenomenological study. *Scand J Prim Health Care*. 2005;23(2):120-125. doi: 10.1080/02813430510018491.
16. Evans CT, Rogers TJ, Weaver FM, Burns SP. Providers' beliefs and behaviors regarding antibiotic prescribing and antibiotic resistance in persons with spinal cord injury or disorder. *J Spinal Cord Med*. 2011;34(1):16-21. doi:10.1179/107902610X12886261091794.
17. Dempsey PP, Businger AC, Whaley LE, Gagne JJ, Linder JA. Primary care clinicians' perceptions about antibiotic prescribing for acute bronchitis: a qualitative study. *BMC Fam Pract*. 2014;15:194. doi: 10.1186/s12875-014-0194-5.
18. Butler CC, Rollnick S, Pill R, Maggs-Rapport F, Scott N. Understanding the culture of prescribing: qualitative study of general practitioners' and patients' perceptions of antibiotics for sore throats. *BMJ*. 1998;317(7159):637-642. doi: 10.1136/bmj.317.7159.637.
19. May L, Gudger G, Armstrong P, et al. Multisite exploration of clinical decision making for antibiotic use by emergency medicine providers using quantitative and qualitative methods. *Infect Control Hosp Epidemiol*. 2014;35(9):1114-1125. doi:10.1086/677637.
20. Bauchner H, Pelton SI, Klein JO. Parents, physicians, and antibiotic use. *Pediatrics*. 1999;103(2):395-401.
21. Wood F, Phillips C, Brookes-Howell L, et al. Primary care clinicians' perceptions of antibiotic resistance: a multi-country qualitative interview study. *J Antimicrob Chemother*. 2013;68(1):237-243. doi:10.1093/jac/dks338.
22. Simpson SA, Wood F, Butler CC. General practitioners' perception of antimicrobial resistance: a qualitative study. *J Antimicrob Chemother*. 2007;59(2):292-296. doi: 10.1093/jac/dkl467.
23. Zickafoose JS, Ireys HT, Swinburn A, Simpson LA. Primary Care Physicians' Experiences With and Attitudes Toward Pediatric Quality Reporting. *Acad Pediatr*. 2016;16(8):750-759. doi:10.1016/j.acap.2016.07.005.
24. Federman AD, Keyhani S. Physicians' participation in the Physician' Quality Reporting Initiative and their perceptions of its impact on quality of care. *Health Policy*. 2011;102(2-3):229-234. doi:10.1016/j.healthpol.2011.05.003.
25. Brown JD. Evaluations of Self and Others: Self-Enhancement Biases in Social Judgments. *Soc Cogn*. 1986;4(4):353-376. doi: 10.1521/soco.1986.4.4.353.
26. John OP, Robins RW. Accuracy and bias in self-perception: individual differences in self-enhancement and the role of narcissism. *J Pers Soc Psychol*. 1994;66(1):206-219. doi: 10.1037/0022-3514.66.1.206.
27. Meeker D, Linder JA, Fox CR, et al. Effects of Behavioral Interventions on Inappropriate Antibiotic Prescribing Among Primary Care Practices: A Randomized Clinical Trial. *JAMA*. 2016;315(6):562-70. doi:10.1001/jama.2016.0275.
28. Linder JA, Meeker D, Fox CR, et al. Effects of Behavioral Interventions on Inappropriate Antibiotic Prescribing in Primary Care 12 Months After Stopping Interventions. *JAMA*. 2017;318(14):1391-1392. doi:10.1001/jama.2017.11152.

**Table 1. Themes and quotations from primary care physicians regarding antibiotic resistance as a public health issue**

| Themes                                                                                                               | Quotations                                                                                                                                                                                                                                                                                                                                                                                                                                                                                                                                                                                                                                                                                                                                                                                                                                                                                                                                                                                         |
|----------------------------------------------------------------------------------------------------------------------|----------------------------------------------------------------------------------------------------------------------------------------------------------------------------------------------------------------------------------------------------------------------------------------------------------------------------------------------------------------------------------------------------------------------------------------------------------------------------------------------------------------------------------------------------------------------------------------------------------------------------------------------------------------------------------------------------------------------------------------------------------------------------------------------------------------------------------------------------------------------------------------------------------------------------------------------------------------------------------------------------|
| <i>Antibiotic resistance seen as less important than other public health issues faced by primary care physicians</i> | <p>(1) “We are seeing some MRSA. Everybody does. It is just so low on the totem pole compared to the other things that we are seeing. – Birmingham, family medicine/internal medicine physician</p> <p>(2) “It’s important, but in everyday practice I thought that other things were more important.” – Chicago, pediatrician</p>                                                                                                                                                                                                                                                                                                                                                                                                                                                                                                                                                                                                                                                                 |
| <i>Antibiotic resistance is an issue, but not for my patient population</i>                                          | <p>(1) “I thought about antibiotic resistance as more of a problem, not in my practice that much, but in a hospital with a very sick person where they can’t find something because somebody’s resistant.” – Chicago, pediatrician</p> <p>(2) “It’s not like I’m seeing my patients having an issue on a regular basis like these other things are. There’s this threat of this crazy super bug that will take over the world and kill us all, but I’ve never – it doesn’t seem like reality. – Philadelphia, family medicine/internal medicine physician</p> <p>(3) “We’re starting to see it in the community. I think if you had a table full of infectious disease doctors working in intensive care units, you would have different priorities. But in the outpatient, we probably see it less [...] It is a matter of time before we see it more. Who knows, a year, two, three from now, these numbers might be different.” – Philadelphia, family medicine/internal medicine physician</p> |

**Table 2. Themes and quotations from primary care physicians regarding drivers antibiotic prescribing**

| Themes                                                                      | Quotations                                                                                                                                                                                                                                                                                                                                                                                                                                                                                                                                                                                                                                                                                                                                                                                                                                                                     |
|-----------------------------------------------------------------------------|--------------------------------------------------------------------------------------------------------------------------------------------------------------------------------------------------------------------------------------------------------------------------------------------------------------------------------------------------------------------------------------------------------------------------------------------------------------------------------------------------------------------------------------------------------------------------------------------------------------------------------------------------------------------------------------------------------------------------------------------------------------------------------------------------------------------------------------------------------------------------------|
| <i>Externalized responsibility for inappropriate antibiotic prescribing</i> | <p>(1) “I think those of us who have our own practice and control of things probably [...] ‘get it’ more than the hourly non-vested person in your walk-in clinics who are just basically drawing an hourly salary and their whole interest is in just getting rid of somebody.” – Birmingham, family medicine/internal medicine physician</p> <p>(2) “We’re always practicing evidence-based medicine, so it becomes incredibly challenging. With adult medicine, they’ll give out antibiotics over the phone, antibiotics without doing swabs and chest X-rays, things like that, or even seeing the patient.” – Chicago, pediatrician</p> <p>(3) “A lot of us don’t like to prescribe antibiotics, but they go to urgent cares and they go to [...] one-minute clinics and they get prescribed antibiotics.” – Los Angeles, family medicine/internal medicine physician</p> |
| <i>Patient demand as a driving factor</i>                                   | <p>(1) “We’re under pressure all day. You don’t want to get written up, potentially, for being insensitive, or not taking care of them, or physician ratings.” – Birmingham, pediatrician</p> <p>(2) “They come in and it’s a boxing match. You are fighting in that corner with the misconception, preconceived notion and you’re trying to tell them that <math>2 + 2 = 4</math> and they are saying, “No, it’s purple”. – Birmingham, family medicine/internal medicine physician</p> <p>(3) “Sometimes you just like, you know what, I’m beaten down; so, here’s your Z-Pak. See you. Next patient. I’m not going to sit here and argue with somebody for five minutes over why they don’t need it.” – Philadelphia, family medicine/internal medicine physician</p>                                                                                                       |

**Table 3. Themes and quotations from primary care physicians regarding patient and provider education as antibiotic stewardship activities**

| <b>Themes</b>                               | <b>Quotations</b>                                                                                                                                                                                                                                                                                                                                                                                                                                                                                                                                                                                                                                |
|---------------------------------------------|--------------------------------------------------------------------------------------------------------------------------------------------------------------------------------------------------------------------------------------------------------------------------------------------------------------------------------------------------------------------------------------------------------------------------------------------------------------------------------------------------------------------------------------------------------------------------------------------------------------------------------------------------|
| <i>Need for patient education</i>           | <p>(1) “It will not work unless you educate the population. You cannot attack the doctors and curtail what they are doing until you educate patients that your doctor is doing the right thing.” – Birmingham, family medicine/internal medicine physician</p> <p>(2) “I think it’s more education. I think you could probably do more with a commercial than you can with anything else.” – Chicago, pediatrician</p>                                                                                                                                                                                                                           |
| <i>Acceptability of physician education</i> | <p>(1) “Parents are going to ask. They don’t know what’s right or wrong. They’re not medically trained. It’s the physicians that need more education about not prescribing.” – Chicago, pediatrician</p> <p>(2) “I think the best education strategy we could get and maybe there could be a study done is how, what is the best way to communicate to patients that antibiotic overprescribing and resistance is a problem and that rings true to them, that we can tell them this and they’re going to understand that and accept the fact that it didn’t lead to antibiotics.” – Los Angeles, family medicine/internal medicine physician</p> |



**Table 4. Themes and quotations from primary care physicians regarding antibiotic use measurement as an antibiotic stewardship activity**

|                                                                   |                                                                                                                                                                                                                                                                                                                                                                                                                                                                                                                                                                                                                                                                                                                                                                                                                                                                                   |
|-------------------------------------------------------------------|-----------------------------------------------------------------------------------------------------------------------------------------------------------------------------------------------------------------------------------------------------------------------------------------------------------------------------------------------------------------------------------------------------------------------------------------------------------------------------------------------------------------------------------------------------------------------------------------------------------------------------------------------------------------------------------------------------------------------------------------------------------------------------------------------------------------------------------------------------------------------------------|
| <p><i>Feasibility of measuring antibiotic prescribing</i></p>     | <p>(1) “Like I said, you’ll get patients who were seen within hours by 2 different people, and one gives the antibiotic and the other one doesn’t. It’s not necessarily that the person who doesn’t give it is always right, and the other one’s always wrong. It’s too subjective.” – Chicago, pediatrician</p> <p>(2) “There’s more thought process into the physician having to, there’s a reason basically why a physician chooses or not chooses to, the management specifically. So, until they actually come and look at our, the history, the physical, and overall clinical management, they really will not know why we prescribed the way we did it.” – Los Angeles, family medicine/internal medicine physician</p>                                                                                                                                                   |
| <p><i>Belief that physicians will “game the system”</i></p>       | <p>(1) “As soon as you start having measurements like that, you’re going to have a lot more diagnoses of walking pneumonia or pneumonia.” – Los Angeles, family medicine/internal medicine physician</p> <p>(2) “People don’t put down accurate diagnoses, and then when you have something like this, then everyone is going to start gaming the system. ‘I’m not going to put down diagnosis of bronchitis. No, I’m going to put sinusitis.’ Even through it’s bronchitis, I can give you the antibiotic and not get dinged for it.” – Philadelphia, family medicine/internal medicine physician</p>                                                                                                                                                                                                                                                                            |
| <p><i>Dissatisfaction with the quality measurement system</i></p> | <p>(1) “These days we’re all getting measured on everything. Every time we click a button on the EMR whether it’s diabetes, cholesterol, blood pressure, antibiotic prescribing, no matter what it is someone’s measuring it. Someone’s telling us what we should be doing. I think, I’ll speak for myself; physicians are starting to get tired of being told what to do.” – Philadelphia, family medicine/internal medicine physician</p> <p>(2) “That’s going to fall into a P for P program. A payment for performance which is the insurance company’s way of paying doctors less money.” – Los Angeles, pediatrician</p> <p>(3) “We’ve discovered that they don’t work very well, and then, almost always if there’s an incentive for doing something, there’s going to be a punishment for not doing it. There’s never just the incentive.” – Birmingham, pediatrician</p> |
| <p><i>Distrust of tracking and reporting systems</i></p>          | <p>(1) “For example, I vaccinate every kid that comes to see me with Menactra [...] [Insurance company] recently said that I did not get 23 kids, but when I go to the state registry, every single one of those kids got their Menactra, before the age of 13. Their data collection practices are questionable and manipulable, and I don’t trust it.” – Birmingham, pediatrician</p> <p>(2) “The quality of the data seems always so poor [...] I have patients that I’ve never seen that are on my list, I had a patient that was dead for 2 years that was on my list. So the quality of the data collection and how you’re going to do that is so important.” – Los Angeles, family medicine/internal medicine physician</p>                                                                                                                                                |

## Supplementary Data

### Antibiotic Stewardship Moderator's Guide

*Modified format for manuscript submission*

#### 1. Introduction

- a. Background: mirrors, taps
- b. Introduction of moderator, participants: name, years in practice, practice size, practice ownership (physician vs. hospital-owned), personal ownership status (i.e., employee vs. full/part owner)

#### 2. Perceived Importance of Antibiotic Resistance as a Public Health Issue

- a. As physicians, you confront a myriad of public health issues that impact you and your patient care daily. I want to discuss some of those issues, so I can understand where your areas of greatest concerns are focused.
- b. Exercise #1

#### **Exercise #1**

Moderator will hand out Sheet A with the listing the following topics:

- Overweight and obesity
- Antibiotic resistance
- Misinformation about childhood vaccines (pediatricians only)
- Opioid abuse
- Diabetes
- Patient non-compliance with drug regimens
- Smoking and tobacco use

#### Questions

1. On your sheet, would you please rank the public health issue from most important to least important? Put a 1 next to the most important, 2 for the next most important, etc. to the least important of these topics.
2. Moderator goes around the room to get the scores, does a quick tally, and determines where antibiotic resistance falls within the list of public health issues.
3. Overall, most of you have put antibiotic resistance as X in the list. Tell me why you believe it is important. What are your concerns about antibiotic resistance in the near term, say in the next 2-3 years? What about the next 10 years? Why isn't it higher on the list? Do you think that in 10 years it will be higher on the list?

- c. What do you hear from colleagues and fellow physicians about antibiotic use and antibiotic resistance? Is it a subject of conversation when physicians get together? How much of an issue is it for you in your practice?

#### 3. Attitudes and Perceptions of Antibiotics

- a. When you are deciding whether or not to prescribe an antibiotic for a patient, what are some of the factors you consider? (e.g., confidence in diagnosis [viral vs. bacterial infection], side effects associated with antibiotic use, AE risks such as C. diff, public health concerns such as antibiotic resistance)
  - i. When patients present with ambiguous symptoms (i.e., ones that could be associated with bacterial or viral infections), do you see prescribing antibiotics for these patients as the safer option than doing nothing?
  - ii. How often do adverse events or side effects associated with antibiotic use override the benefit of prescribing the antibiotic?
  - iii. When those arise, what are your options for the patient?
- b. Do you talk to your patients about the potential adverse events before you decide to prescribe?
  - i. Is it more often the patient, or yourself who is concerned about adverse events?
- c. How often in the past two months have you spoken to patients about the appropriate use of antibiotics, efficacy, resistance?
- d. Have you denied anyone antibiotics in the past two months who wanted them?
  - i. Could you walk me through one of those conversations? For instance, if I am your patient, how would you talk to me about this?
  - ii. What motivates this discussion?
  - iii. How often does the issue of antibiotic overuse, or antibiotic resistance come up in these discussions?
  - iv. How long, on average, does this type of discussion take? How much pushback do you receive from patients?

#### 4. Antibiotic Stewardship Definition

##### a. Exercise #3

#### **Exercise #3**

Please write down on your pad, what antibiotic stewardship means to you. Even if it's not a term you're familiar with, just jot down a sentence about what you believe it means.

Moderator will go around the room and have each participant read aloud their definition, if they have one. Moderator will then provide the following definition (verbally and in writing):

“Activities that aim to ensure that antibiotics are used only when indicated and, when needed, that the most appropriate antibiotic is prescribed at the right dose and duration of therapy.”

Question: Do you have any thoughts on that?

##### b. Exercise #4

#### **Exercise #4**

Moderator will hand out Sheet B

1  
2  
3  
4  
5  
6  
7  
8  
9  
10  
11  
12  
13  
14  
15  
16  
17  
18  
19  
20  
21  
22  
23  
24  
25  
26  
27  
28  
29  
30  
31  
32  
33  
34  
35  
36  
37  
38  
39  
40  
41  
42  
43  
44  
45  
46  
47  
48  
49  
50  
51  
52  
53  
54  
55  
56  
57  
58  
59  
60

Questions:

1. Do these data match with your thoughts about antibiotic resistance?
2. What matches what you believe? What is different?
3. Do these points make sense to you as the basic tenets of antibiotic stewardship? Do you think there is anything that shouldn't be these? Anything that is missing?

5. Elements of Antibiotic Stewardship (15 minutes)

a. Exercise #5

**Exercise #5**

Moderator will hand out modified versions of pages 16-24 of the Centers for Disease Control and Prevention's Core Elements of Outpatient Antibiotic Stewardship (<https://www.cdc.gov/antibiotic-use/community/improving-prescribing/core-elements/core-outpatient-stewardship.html>).

Questions:

1. I'm going to hand out some pages from the Elements of Antibiotic Stewardship. I know this is quite a bit to go through. If you will please read through this – focus on the bolded sentence and just scan the text below it. As you are reading, circle the phrases or sentences that attract you to the activity, that increase your interest in participating. If you would also cross out any phrases or sentences that you think would present a problem for you, be obstacles or would decrease your interest in the program.
2. For each element, moderator will ask for (1) Overall reaction; (2) What areas did you like – what was circled; (3) What areas did you think were obstacles or that you disliked?

6. Current/Past Stewardship or Quality Improvement Activities (15 minutes)

- a. Are you doing any kind of stewardship or quality improvement activities in your practice currently related to antibiotic prescribing or treatment, or any other disease area quality improvement activities?
  - i. Describe those to me.
  - ii. If no antibiotic related QA activities – probe for other areas of QA activities. In descriptions, include things like data collection, analysis, interpretation, personnel used, outside consulting used, design and implementation of activities, outcomes, cost and funding.
- b. In your practice, is there dedicated or protected time to perform quality improvement activities? This is for any area, not just antibiotics.
- c. Is there any dedicated expertise on staff for quality improvement activities? (probe if needed: like a data analyst)
- d. Is there any dedicated funding for quality improvement activities?
- e. What is your motivation for implementing quality improvement activities?

7. Tools for Adoption of Antibiotic Stewardship (15 minutes)

## a. Exercise #6

**Exercise #6**

Moderator will hand out Sheet C

Questions:

1. On this sheet I have listed a number of the issues we have discussed. I'd like you to think about your own practice and for each of the items, check whether you have access to each potential tool. If you do have access to a tool, please indicated whether you currently use this tool to support antibiotic stewardship activities and make a few notes as to why you do or don't. If you do not have access to a tool, please indicate the level of burden it would be to develop this tool for your practice.
2. Moderator will go around the room and determine the top two or three tools to discuss.
3. For each: What makes this tool such as big burden? What are some ideas you have that might help with this? Do you think it would be a serious impediment to implementing antibiotic stewardship?

8. Policies/Tools to Encourage the Adoption of Antibiotic Stewardship (15 minutes)

## a. Exercise #7

**Exercise #7**

Moderator will hand out Sheet D

Questions:

1. There are a number of potential resources to support your efforts in the appropriate use of antibiotics. I'm going to hand out a list that I'd like you to read. Next to each item in the list is a rating scale of 1 to 5. Please check the box for each resource that describes how motivating each of these is for you. 1 means not at all useful. 5 means very useful. You can use any number in between. When you're done, we'll discuss it.
2. Moderator will collect the ratings and run a quick tally. Discussion will then start with the statement that is most motivating and work down from there.
3. Statement X has the greatest number of you giving it a high score. Those of you that gave it a high score, tell me what about X is the most useful. Are there any problem with it? (Moderator will then continue on for each of the 8 remaining statements.)
4. Is there anything that isn't on this list that you have seen utilized for other quality improvement programs that you think might be effective here?

- 1  
2  
3 b. Realistically, without external aid/requirements, what is the likelihood of your adopting  
4 voluntary antibiotic stewardship activities? (defined as having the elements discussed  
5 previously: data tracking and reporting, development and implementation of improvement  
6 activities, education/training of providers and staff, etc.)  
7  
8 c. Do patient satisfaction scores influence your decision-making around prescribing  
9 antibiotics? What kind and how much of an impact do they have?  
10  
11 d. If you wanted to implement antibiotic stewardship activities in your practice, or just  
12 improve your antibiotic prescribing, what do you think would be helpful to you?  
13 i. Toolkits on how to implement antibiotic stewardship interventions?  
14 ii. Feedback on antibiotic prescribing patterns in your area/practice?  
15 iii. Incentives from payers?  
16 iv. Other?  
17

18 9. Quality Measures for Appropriate Antibiotic Use (10 minutes)  
19

- 20 a. Our last subject today is quality measures. How familiar would you say you are with the  
21 Healthcare Effectiveness Data and Information Set (HEDIS) published by the National  
22 Committee for Quality Assurance (NCQA).  
23 i. For antibiotics, other disease areas?  
24 ii. Do you report HEDIS measures related to antibiotic use as part of your quality  
25 reporting?  
26 iii. Do you believe that these measures appropriately capture your antibiotic prescribing  
27 practices? Is the HEDIS measure accurate for your practice? (e.g., Bronchitis (adults)  
28 and upper respiratory infections (children)) If the participants indicate they do not  
29 think these measures accurately capture their prescribing, ask what would be needed  
30 for them to trust these data?  
31  
32 b. At your practice, are there direct/individual financial incentives for you – i.e., bonuses –  
33 tied to your performance on quality measures (antibiotics or otherwise)? In your opinion,  
34 do they work?  
35  
36 c. If antibiotic use quality measures were among the measures you can choose from to report  
37 to public (CMS) or private health plans as part of quality reporting requirements, how likely  
38 is it that you will select antibiotic quality measures vs. other quality measures?  
39  
40

41 10. Thank and end group  
42

43 **Sheet A**  
44

45

|                                                                 | Ranking 1-6<br>1 = most important<br>6 = least important |
|-----------------------------------------------------------------|----------------------------------------------------------|
| A. Overweight and Obesity                                       |                                                          |
| B. Opioid Abuse                                                 |                                                          |
| C. Antibiotic Resistance                                        |                                                          |
| D. Misinformation About Childhood Vaccines (pediatricians only) |                                                          |
| E. Diabetes                                                     |                                                          |

46  
47  
48  
49  
50  
51  
52  
53  
54  
55  
56  
57  
58  
59  
60

|                                              |  |
|----------------------------------------------|--|
| F. Patient Non-Compliance with Drug Regimens |  |
| G. Smoking and Tobacco Use                   |  |

### Sheet B

According to the CDC, antibiotic resistance is among the greatest public health threats today.

- Leading to an estimated 12 million infections and 23,000 deaths per year in the US.

The most important modifiable risk factor for antibiotic resistance is inappropriate prescribing of antibiotics.

- Approximately half of outpatient prescribing in humans might be inappropriate including:
  - Antibiotic selection
  - Dosing or duration
  - Unnecessary antibiotic prescribing
- Estimates are that at least 30% of outpatient antibiotic prescriptions in the US are unnecessary.

Antibiotic stewardship is the effort

- To measure antibiotic prescribing
- To improve antibiotic prescribing by clinicians and use by patients so that antibiotics are only prescribed and used when needed
- To minimize misdiagnoses or delayed diagnoses leading to underuse of antibiotics
- To ensure that the right drug, dose, and duration are selected when an antibiotic is needed

### Sheet C

| Potential tools available to use antibiotics more effectively  | Currently have access to this | If you have access, are you currently using this tool to support antibiotic stewardship efforts? Why/why not? | If you do not have access, how much of a burden would it be to develop this type of tool for your practice?            |
|----------------------------------------------------------------|-------------------------------|---------------------------------------------------------------------------------------------------------------|------------------------------------------------------------------------------------------------------------------------|
| 1. Timely, Accurate Feedback Reports on Antibiotic Prescribing |                               |                                                                                                               | <input type="checkbox"/> Not a burden<br><input type="checkbox"/> Some burden<br><input type="checkbox"/> Large burden |

|                                                                                                                    |  |  |                                                                                                                        |
|--------------------------------------------------------------------------------------------------------------------|--|--|------------------------------------------------------------------------------------------------------------------------|
| 2. Information on antibiotic adverse effects seen in your patients                                                 |  |  | <input type="checkbox"/> Not a burden<br><input type="checkbox"/> Some burden<br><input type="checkbox"/> Large burden |
| 3. Reports from electronic health records on antibiotic prescribing practices.                                     |  |  | <input type="checkbox"/> Not a burden<br><input type="checkbox"/> Some burden<br><input type="checkbox"/> Large burden |
| 4. Clinical decision support tools for antibiotic prescribing/ diagnosis aids that leads to antibiotic prescribing |  |  | <input type="checkbox"/> Not a burden<br><input type="checkbox"/> Some burden<br><input type="checkbox"/> Large burden |
| 5. Patient triage system                                                                                           |  |  | <input type="checkbox"/> Not a burden<br><input type="checkbox"/> Some burden<br><input type="checkbox"/> Large burden |
| 6. Access to experts in infectious diseases, pharmacy, quality improvement practices                               |  |  | <input type="checkbox"/> Not a burden<br><input type="checkbox"/> Some burden<br><input type="checkbox"/> Large burden |
| 7. Access to physician education/ training materials on antibiotic prescribing                                     |  |  | <input type="checkbox"/> Not a burden<br><input type="checkbox"/> Some burden<br><input type="checkbox"/> Large burden |
| 8. Access to materials for patient education on appropriate use of antibiotics                                     |  |  | <input type="checkbox"/> Not a burden<br><input type="checkbox"/> Some burden<br><input type="checkbox"/> Large burden |

**Sheet D**

| Potential feedback loops on antibiotic use                                                                                                                                                                      | 1<br>Not at all<br>useful | 2 | 3 | 4 | 5<br>Very<br>useful |
|-----------------------------------------------------------------------------------------------------------------------------------------------------------------------------------------------------------------|---------------------------|---|---|---|---------------------|
| 1. If you received a letter from state department of health or health plan notifying your that you or your practice is a “high prescriber” of antibiotics when compared to other providers in your state/region |                           |   |   |   |                     |
| 2. If private health plans create a stand-alone quality incentive program for antibiotic stewardship                                                                                                            |                           |   |   |   |                     |



|                                                                                                                                                                                                         |  |  |  |  |  |
|---------------------------------------------------------------------------------------------------------------------------------------------------------------------------------------------------------|--|--|--|--|--|
| 3. If private health plans include antibiotic stewardship as a “menu item” for a quality incentive program                                                                                              |  |  |  |  |  |
| 4. If your state publicly recognizes practices/individuals that have demonstrated most appropriate antibiotic prescribing                                                                               |  |  |  |  |  |
| 5. If your state publicly publishes results of quality measures for appropriate antibiotic use for all practice locations                                                                               |  |  |  |  |  |
| 6. If your state department of health publishes aggregate data on the volume of outpatient antibiotic prescribing in your state                                                                         |  |  |  |  |  |
| 7. If your state publicly reports “high prescribing” practices                                                                                                                                          |  |  |  |  |  |
| 8. If you received a report card from state department of health or health plans that measure the rates of antibiotic adverse events for your patients compared to other providers in your state/region |  |  |  |  |  |
| 9. If you received a report card from state department of health or health plans on quality measures for antibiotics when compared to other providers in your state/region                              |  |  |  |  |  |

# BMJ Open

## Primary Care Physicians' Attitudes and Perceptions toward Antibiotic Resistance and Outpatient Antibiotic Stewardship: A Qualitative Study

|                                 |                                                                                                                                                                                                                                                                                                                                                                                                                                                    |
|---------------------------------|----------------------------------------------------------------------------------------------------------------------------------------------------------------------------------------------------------------------------------------------------------------------------------------------------------------------------------------------------------------------------------------------------------------------------------------------------|
| Journal:                        | <i>BMJ Open</i>                                                                                                                                                                                                                                                                                                                                                                                                                                    |
| Manuscript ID                   | bmjopen-2019-034983.R1                                                                                                                                                                                                                                                                                                                                                                                                                             |
| Article Type:                   | Original research                                                                                                                                                                                                                                                                                                                                                                                                                                  |
| Date Submitted by the Author:   | 13-Jan-2020                                                                                                                                                                                                                                                                                                                                                                                                                                        |
| Complete List of Authors:       | Zetts, Rachel; PEW Charitable Trusts<br>Stoesz, Andrea; PEW Charitable Trusts<br>Garcia, Andrea; American Medical Association<br>Doctor, Jason; University of Southern California Sol Price School of Public Policy<br>Gerber, Jeffrey S.; Children's Hospital of Philadelphia<br>Linder, Jeffrey; Northwestern University Feinberg School of Medicine, Division of General Internal Medicine and Geriatrics<br>Hyun, David; PEW Charitable Trusts |
| <b>Primary Subject Heading</b>: | Public health                                                                                                                                                                                                                                                                                                                                                                                                                                      |
| Secondary Subject Heading:      | Infectious diseases, Qualitative research, General practice / Family practice                                                                                                                                                                                                                                                                                                                                                                      |
| Keywords:                       | Quality in health care < HEALTH SERVICES ADMINISTRATION & MANAGEMENT, INFECTIOUS DISEASES, PRIMARY CARE, PUBLIC HEALTH, QUALITATIVE RESEARCH                                                                                                                                                                                                                                                                                                       |
|                                 |                                                                                                                                                                                                                                                                                                                                                                                                                                                    |

SCHOLARONE™  
Manuscripts



I, the Submitting Author has the right to grant and does grant on behalf of all authors of the Work (as defined in the below author licence), an exclusive licence and/or a non-exclusive licence for contributions from authors who are: i) UK Crown employees; ii) where BMJ has agreed a CC-BY licence shall apply, and/or iii) in accordance with the terms applicable for US Federal Government officers or employees acting as part of their official duties; on a worldwide, perpetual, irrevocable, royalty-free basis to BMJ Publishing Group Ltd ("BMJ") its licensees and where the relevant Journal is co-owned by BMJ to the co-owners of the Journal, to publish the Work in this journal and any other BMJ products and to exploit all rights, as set out in our [licence](#).

The Submitting Author accepts and understands that any supply made under these terms is made by BMJ to the Submitting Author unless you are acting as an employee on behalf of your employer or a postgraduate student of an affiliated institution which is paying any applicable article publishing charge ("APC") for Open Access articles. Where the Submitting Author wishes to make the Work available on an Open Access basis (and intends to pay the relevant APC), the terms of reuse of such Open Access shall be governed by a Creative Commons licence – details of these licences and which [Creative Commons](#) licence will apply to this Work are set out in our licence referred to above.

Other than as permitted in any relevant BMJ Author's Self Archiving Policies, I confirm this Work has not been accepted for publication elsewhere, is not being considered for publication elsewhere and does not duplicate material already published. I confirm all authors consent to publication of this Work and authorise the granting of this licence.

1  
2  
3 **Title:** Primary Care Physicians' Attitudes and Perceptions toward Antibiotic Resistance and  
4 Outpatient Antibiotic Stewardship: A Qualitative Study  
5

6 **Authors:** Rachel M. Zetts, MPH<sup>1</sup>, Andrea Stoesz, MPH<sup>1</sup>, Andrea M. Garcia, JD, MPH<sup>2</sup>, Jason N.  
7 Doctor, PhD<sup>3</sup>, Jeffrey S. Gerber, MD, PhD<sup>4</sup>, Jeffrey A. Linder, MD, MPH<sup>5</sup>, David Y. Hyun, MD<sup>1</sup>  
8  
9

10 **Affiliations:** <sup>1</sup>The Pew Charitable Trusts, Washington, DC, USA  
11 <sup>2</sup>American Medical Association, Chicago, USA  
12 <sup>3</sup>Department of Health Policy and Management, Sol Price School of Public Policy,  
13 University of Southern California, Los Angeles, USA  
14 <sup>4</sup>Division of Infectious Diseases, Children's Hospital of Philadelphia, Philadelphia,  
15 USA  
16 <sup>5</sup>Division of General Internal Medicine and Geriatrics, Northwestern University  
17 Feinberg School of Medicine, Chicago, USA  
18  
19

20 **Address correspondence to:** Ms. R.M. Zetts, Officer, Antibiotic Resistance Project, The Pew  
21 Charitable Trusts, 901 E Street, NW, Washington, DC, 20004, USA, 202-540-6557,  
22 [rzetts@pewtrusts.org](mailto:rzetts@pewtrusts.org)  
23  
24

25 **Abstract Word Count:** 285  
26

27 **Article Word Count:** 3,934  
28

29 **Number of Tables:** 4  
30

31 **Keywords:** antibiotic resistance, antibiotics, antimicrobial stewardship, primary care, qualitative  
32 research  
33  
34  
35  
36  
37  
38  
39  
40  
41  
42  
43  
44  
45  
46  
47  
48  
49  
50  
51  
52  
53  
54  
55  
56  
57  
58  
59  
60

**Abstract:**

**Objectives:** At least 30% of outpatient antibiotic prescriptions are unnecessary. Outpatient antibiotic stewardship is needed to improve prescribing and address the threat of antibiotic resistance. A better understanding of primary care physicians' (PCPs) attitudes towards antibiotic prescribing and outpatient antibiotic stewardship is needed to identify barriers to stewardship implementation and help tailor stewardship strategies. The aim of this study was to assess PCPs' current attitudes towards antibiotic resistance, inappropriate antibiotic prescribing, and the feasibility of outpatient stewardship efforts.

**Design:** Eight focus groups were conducted with PCPs in 4 U.S. cities: Philadelphia, Birmingham, Chicago, and Los Angeles – one with family medicine/internal medicine physicians and one with pediatricians in each city. An independent moderator conducted each focus group using a moderator guide. Focus groups were audio-recorded, transcribed, and coded for major themes using deductive and inductive content analysis methods.

**Results:** Twenty-six family medicine/internal medicine physicians and 26 pediatricians participated. Participants acknowledged that resistance is an important public health issue, but not as important as other pressing problems (e.g., obesity, opioids). Many considered resistance to be more of a hospital issue. While participants recognized inappropriate prescribing as a problem in outpatient settings, many felt that the key drivers were non-primary care settings (e.g., urgent care clinics, retail clinics) and patient demand. Participants reacted positively to stewardship efforts aimed at educating patients and clinicians. They questioned the validity of antibiotic prescribing metrics. This skepticism was due to a number of factors, including the feasibility of capturing prescribing quality, a belief that physicians will “game the system” to improve their measures, and dissatisfaction and distrust of quality measurement in general.

1  
2  
3 **Conclusions:** Stakeholders will need to consider physician attitudes and beliefs about antibiotic  
4  
5 stewardship when implementing interventions aimed at improving prescribing.  
6  
7  
8  
9

### 10 **Strengths and limitations of this study**

- 12 ➤ This study presents new data on U.S.-based primary care physicians' attitudes towards  
13 antibiotic resistance, inappropriate antibiotic prescribing, and outpatient antibiotic  
14 stewardship approaches.  
15  
16  
17  
18
- 19 ➤ Eight focus groups with internal medicine physicians, family medicine physicians, and  
20 pediatricians were held in four geographically-dispersed U.S. cities, which allowed for a  
21 wide-range of viewpoints to be represented in the dataset.  
22  
23  
24  
25
- 26 ➤ The focus groups did not include some types of clinicians that provide primary care in the  
27 U.S. (e.g., nurse practitioners, physician assistants).  
28  
29
- 30 ➤ Although physicians from across the U.S. were included in this study, the small sample  
31 size limits the generalizability of these findings.  
32  
33  
34  
35  
36  
37  
38  
39  
40  
41  
42  
43  
44  
45  
46  
47  
48  
49  
50  
51  
52  
53  
54  
55  
56  
57  
58  
59  
60

## Introduction

Antibiotic resistance poses a growing threat to public health and antibiotic use is a primary driver of the development of resistant bacteria. In the United States, the majority of antibiotics used in humans are prescribed in outpatient healthcare settings.[1] Considering the volume of antibiotics prescribed and data from other countries, ambulatory antibiotic prescribing likely accounts for 80-90% of all antibiotic prescribing.[2,3]

There were 270.2 million outpatient antibiotic prescriptions dispensed in 2016.[4] While this represents a 5% decrease since 2011, prescribing rates have been relatively stable from 2014-2016.[4] Previous studies have found that a significant proportion of outpatient antibiotic prescriptions are inappropriate.[5-9] Many of these inappropriate prescriptions were for acute respiratory conditions that often do not require antibiotics.[5,7,8]

In order to improve antibiotic prescribing in primary care offices and other outpatient healthcare settings, the Centers for Disease Control and Prevention (CDC) published core elements of outpatient antibiotic stewardship, highlighting steps that stakeholders can take in support of stewardship efforts.[10] However, additional work is needed to ensure outpatient stewardship efforts are expanded nationwide. A better understanding of physicians' attitudes towards antibiotic prescribing and their perceptions on the feasibility and impact of stewardship interventions would identify barriers to stewardship implementation in U.S. ambulatory settings and would allow stakeholders to better tailor strategies to improve prescribing.

1  
2  
3 Previous studies have shown that physicians consider patient demand and prescribing of other  
4 physicians to be primary drivers of inappropriate antibiotic prescribing.[11-24] In order to  
5  
6 counteract these drivers of inappropriate prescribing, physicians have highlighted a need for  
7  
8 improved public education around antibiotic resistance and the need for appropriate  
9  
10 prescribing.[20-23,25] Additionally, two interview-based studies of primary care clinicians in the  
11  
12 UK and Europe showed a general recognition that antibiotic resistance is an important issue, but  
13  
14 many were less concerned about resistance in their daily practice.[26,27] A systematic review of  
15  
16 studies from different countries found a similar dynamic.[25]  
17  
18  
19  
20  
21  
22  
23

24 Expanding upon this research to gain a better understanding of current attitudes about antibiotic  
25  
26 prescribing and the perceived impact of different antibiotic stewardship approaches among U.S.  
27  
28 outpatient physicians is needed. This is especially true for primary care physicians (PCPs) given  
29  
30 that they account for the largest proportion of outpatient antibiotic prescriptions (38%) in the  
31  
32 United States.[28]  
33  
34  
35  
36  
37

38 In the United States, primary care services are often provided by family medicine physicians,  
39  
40 internists, and pediatricians.[29] The provision of these services can be fragmented. Many patients  
41  
42 do not receive extended primary care services and after-hours care from their usual primary care  
43  
44 offices.[30] Additionally, PCPs in the U.S. receive payment for their services from a range of  
45  
46 commercial and public payers,[29] all of which frequently measure the quality of care to determine  
47  
48 reimbursement levels. All of these factors have the potential to influence PCPs' views on antibiotic  
49  
50 prescribing and approaches to improving antibiotic use in outpatient setting.  
51  
52  
53  
54  
55  
56  
57  
58  
59  
60



1  
2  
3 In order to assess these attitudes and perceptions and inform strategies for antibiotic stewardship  
4 tailored to U.S. outpatient settings, we conducted a series of semi-structured focus groups among  
5  
6 PCPs in the United States.  
7  
8  
9  
10

## 11 **Methods**

### 12 *Study Design*

13  
14  
15  
16  
17 We conducted eight focus groups in November and December of 2017 with PCPs in four U.S.  
18 cities – Philadelphia, PA; Birmingham, AL; Chicago, IL; and Los Angeles, CA. Focus groups  
19 were chosen for this study to allow for open discussion amongst participants and to allow for  
20 different opinions and debate. This allows both for the identification of areas where there is  
21 dissension and broad consensus during the analysis process, and adds further complexity to the  
22 themes.  
23  
24  
25  
26  
27  
28  
29  
30  
31  
32  
33  
34  
35  
36  
37

38 The four cities were selected to represent each of the four U.S. Census regions in order to account  
39 for any potential differences in attitudes based on geographic region. Research has shown a clear  
40 difference in overall outpatient antibiotic prescribing rates by geographic region in the U.S., with  
41 individuals in Southern states prescribed antibiotics at higher rates than those in any other part of  
42 the country.[4,28] For example, in 2017 the antibiotic prescribing rate in West Virginia (the state  
43 with the highest rate) was more than double that of Alaska (the state with the lowest rate).[28]  
44  
45  
46  
47  
48  
49  
50  
51 Additionally, many primary care physicians in the U.S. specialize in family medicine, internal  
52  
53  
54  
55  
56  
57  
58  
59  
60

1  
2  
3 medicine, or pediatrics.<sup>(29)</sup> As such, two focus groups were conducted in each city – one with  
4 family medicine and internal medicine physicians and one with pediatricians.  
5  
6  
7  
8  
9

10 A screening questionnaire was developed to recruit participants. Inclusion criteria included self-  
11 report of board certification in pediatrics, family medicine, or internal medicine; being a full-time  
12 physician primarily practicing in an outpatient office setting; spending  $\geq 50\%$  of medical practice  
13 time in direct patient care; and fluency in English. Participants were excluded if they reported  
14 being  $> 65$  years-old; board-certified in a subspecialty outside of primary care; or an employee or  
15 paid consultant of any of the following organizations: a pharmaceutical, medical device, or  
16 biotechnology company, an advertising or healthcare marketing company, or a governmental or  
17 regulatory agency.  
18  
19  
20  
21  
22  
23  
24  
25  
26  
27  
28  
29

30 Study participants were recruited by M3 Global Research, a medical market research firm.  
31 Participants were initially recruited from a panel of healthcare professionals maintained by M3.  
32 For three cities – Chicago, Birmingham, and Los Angeles – additional participants were recruited  
33 from physician panels maintained by local partners to ensure adequate participation. Individuals  
34 located within a 30-mile radius of each focus group facility were contacted by telephone or online  
35 and screened for participation in this study. Any participant recruited online received a follow-up  
36 call from M3 to confirm their eligibility.  
37  
38  
39  
40  
41  
42  
43  
44  
45  
46  
47  
48

49 Each focus group lasted between 1.5 and 2 hours and was moderated by the same independent  
50 moderator with experience in qualitative research. Prior to each focus group, participants received  
51  
52  
53  
54  
55  
56  
57  
58  
59  
60

1  
2  
3 an informed consent form to review and sign. All participants signed the informed consent form.  
4  
5 Each participant received \$400 to compensate for their time.  
6  
7  
8  
9

10 The study protocol was reviewed for ethical considerations and deemed exempt by the Chesapeake  
11 IRB (now known as Advarra). The Standards for Reporting Qualitative Research reporting  
12 guidelines were used in the reporting of study findings (see supplementary file #1).[31]  
13  
14  
15  
16  
17  
18

### 19 *Data Collection and Analysis*

20  
21  
22  
23

24 The study team and the external moderator developed a semi-structured moderator guide (see  
25 supplementary file #2). This guide aimed to draw out issues identified based on previous research  
26 – such as perceptions of antibiotic resistance and drivers of inappropriate prescribing, including  
27 patient demand – as well as explore new areas, such as the perceived impact of different  
28 stewardship strategies. The guide began by asking participants to rank a number of public health  
29 issues in terms of importance in their daily practice. These issues included excess body weight and  
30 obesity, antibiotic resistance, misinformation about childhood vaccines (pediatricians only), opioid  
31 abuse, diabetes, patient non-compliance with drug regimens, and smoking/tobacco use.  
32  
33  
34  
35  
36  
37  
38  
39  
40  
41  
42  
43

44 The guide then asked questions aimed at understanding the physicians' attitudes and perceptions  
45 around antibiotic use and stewardship, including factors that influence their antibiotic prescribing  
46 decisions and if/how they communicate with patients about these decisions. They were also given  
47 handouts that defined and provided examples of the CDC's Core Elements of Outpatient Antibiotic  
48  
49  
50  
51  
52  
53  
54  
55  
56  
57  
58  
59  
60

1  
2  
3 Stewardship.[10] These handouts were used to gauge perceptions on the feasibility and impact of  
4  
5 the core elements and associated activities.  
6  
7  
8  
9

10 Finally, participants were asked for feedback on activities that encourage antibiotic stewardship  
11  
12 implementation and resource availability to do so. Respondents provided opinions on the  
13  
14 feasibility and effectiveness of example policies and activities that could be implemented by  
15  
16 healthcare stakeholders to encourage stewardship implementation. To assess resource availability,  
17  
18 participants were asked to provide feedback on current access to certain tools to support antibiotic  
19  
20 stewardship efforts, such as feedback reports on antibiotic prescribing practices or access to patient  
21  
22 education materials and, if not, how much of a burden it would be to obtain access.  
23  
24  
25  
26  
27

28 All focus groups were audio and video-recorded, transcribed (using the audio recording), and the  
29  
30 transcripts were coded for major themes in NVivo 11 (QSR International). Common themes were  
31  
32 identified by three study authors (RZ, AS, DH), using both deductive and inductive content  
33  
34 analysis methods.[32,33] We applied the following steps for analyzing the transcripts. First,  
35  
36 researchers (RZ, DH) familiarized themselves with the data by observing all eight focus groups.  
37  
38 Next, an initial list of themes was developed based on (1) a review of past studies on the topic of  
39  
40 antibiotic resistance and stewardship in outpatient settings [11-18,34,35] and (2) the data  
41  
42 familiarization process. These themes were independently applied to the transcripts and coded by  
43  
44 two authors (RZ, AS) and reviewed by another author (DH). During this process, new themes were  
45  
46 identified through further review of the transcripts and some of the initial themes were modified.  
47  
48 Any disagreement in coding was discussed until consensus was met. Coding was considered  
49  
50 complete once theoretical saturation was reached and no additional themes could be identified.[33]  
51  
52  
53  
54  
55  
56  
57  
58  
59  
60

### *Patient and Public Involvement*

This research was done without patient involvement. Patients were not invited to comment on the study design and were not consulted to develop patient relevant outcomes or interpret the results. Patients were not invited to contribute to the writing or editing of this document for readability or accuracy.

### **Results**

A total of 52 PCPs – 26 family medicine and internal medicine physicians and 26 pediatricians – accepted the invitation and participated in the focus groups. No demographic information was collected for these participants.

A number of common themes were identified across these focus groups that illustrated attitudes on the following topics: (1) antibiotic resistance as a public health issue, (2) drivers of antibiotic prescribing, (3) the acceptability of antibiotic stewardship interventions – patient and physician education, and (4) acceptability of performance reporting. Themes within each of these areas are highlighted below, along with areas of disagreement among participants where appropriate.

#### *Antibiotic Resistance as a Public Health Issue*

The initial discussions within each focus group centered on what participants thought about antibiotic resistance as a public health issue. Two themes were seen across focus groups –

1  
2  
3 antibiotic resistance was seen as less of a priority than other public health issues faced by  
4 participants and antibiotic resistance was considered an issue for their patient population (Table  
5  
6  
7  
8 1).

### 9 10 11 12 *Antibiotic resistance seen as less important than other public health issues*

13  
14 A common theme among focus group participants was the perception of antibiotic resistance being  
15 less important in their daily practice when compared with other public health issues they  
16 commonly faced, such as obesity, diabetes, and opioid misuse.  
17  
18  
19  
20  
21  
22  
23

### 24 *Antibiotic resistance is an issue, but not for my patient population*

25  
26 While many participants acknowledged that antibiotic resistance is a concern, many did not see it  
27 as an issue that impacted their patients or their daily practice. Instead, most participants considered  
28 antibiotic resistance as something affecting sicker, hospitalized patients. In contrast, some  
29 participants acknowledged that they have seen an increase in resistant infections in their patients  
30 with urinary tract infections or skin infections. However, these participants still classified resistance  
31 as an issue largely impacting inpatient medicine.  
32  
33  
34  
35  
36  
37  
38  
39  
40  
41

### 42 ***Drivers of Antibiotic Prescribing***

43  
44  
45  
46  
47 Participants in all focus groups also discussed what they thought was driving outpatient antibiotic  
48 prescribing. Two themes emerged: (1) participants argued that other physicians were the ones  
49 driving inappropriate prescribing, and, (2) patient demand for antibiotics continues to be an issue  
50 in primary care (Table 2).  
51  
52  
53  
54  
55  
56  
57  
58  
59  
60

1  
2  
3  
4  
5  
6 *Attribution of inappropriate antibiotic prescribing to others*

7  
8 Participants indicated that they believed inappropriate outpatient antibiotic prescribing is largely  
9  
10 driven by clinicians other than themselves, namely those practicing in urgent care offices and retail  
11  
12 clinics. This contributed to the feeling that resisting patient demand for antibiotics is futile, as  
13  
14 patients can simply see another clinician and get what they want. Participants also said that  
15  
16 patients' past experiences of receiving antibiotics from another clinician reinforced patient  
17  
18 expectations for antibiotics for the same complaint. This, in their mind, strengthens patient resolve  
19  
20 to demand antibiotics.  
21  
22

23  
24  
25  
26 *Patient demand as a driving factor*

27  
28 When discussing drivers of antibiotic prescribing habits, a common theme was the pressure  
29  
30 participants said they experience from patients who the prescribers perceive to expect antibiotics  
31  
32 even when not medically indicated. Participants often returned to this theme throughout the focus  
33  
34 group discussions. Participants contended that patients often feel entitled to leave a visit with a  
35  
36 material treatment – often an antibiotic - after spending time and money at a doctor's office.  
37  
38 Participants argued that patient pressure is compounded by the use of patient satisfaction scores  
39  
40 when grading physician performance. They expressed concern that, if they refused to prescribe an  
41  
42 antibiotic for a patient who expected one, that the patient might write a negative review and/or  
43  
44 score the physician poorly.  
45  
46  
47  
48  
49  
50

51  
52 However, it is important to note that some participants indicated that the impact of patient  
53  
54 expectations for antibiotics on their prescribing decisions can vary. For example, some participants  
55  
56  
57  
58  
59  
60

1  
2  
3 indicated that they may be more willing to push back against prescribing an antibiotic if they have  
4 a long-standing relationship with a patient. This was more common among pediatricians as many  
5 of them indicated they have many opportunities to interact with patients and their parents during  
6 well child visits, making it easier for them to discuss why an antibiotic is or is not needed with  
7 parents.  
8  
9  
10  
11  
12  
13  
14  
15  
16

### ***Acceptability of Antibiotic Stewardship Interventions – Patient and Physician Education***

17  
18  
19  
20

21 On the topic of antibiotic stewardship efforts focused on patient and physician education,  
22 participants primarily indicated support for these activities (Table 3).  
23  
24  
25  
26  
27

#### *Need for patient education*

28  
29  
30

31 Consistent with the perception of patient demand for antibiotics generating concern, participants  
32 emphasized that, in order for them to be able to effectively do their jobs, their patients need to be  
33 educated about when antibiotics are and are not appropriate and why judicious antibiotic use is  
34 critical to combating antibiotic resistance. Participants suggested several approaches for educating  
35 the public, including written education materials in different languages, educational videos for  
36 waiting rooms, and direct-to-consumer advertisements. Finally, many physicians emphasized the  
37 need to provide education in advance of a patient visit. By the time a patient is at a doctor's office  
38 for an illness, many felt it was too late to change patient expectations.  
39  
40  
41  
42  
43  
44  
45  
46  
47  
48  
49  
50

#### *Acceptability of physician education*

51  
52  
53  
54  
55  
56  
57  
58  
59  
60



1  
2  
3 Many participants indicated that physician education would also be a welcome approach for  
4 outpatient antibiotic stewardship. Participants described educational efforts as more helpful for  
5 physicians compared to other interventions, such as providing feedback on prescribing practices,  
6 which was viewed as more critical of physicians. For example, participants indicated that training  
7 in how to communicate antibiotic prescribing decisions to patients would be helpful. One area of  
8 disagreement emerged around whether this education should be mandatory or voluntary. A few  
9 participants mentioned that requiring outpatient physicians to complete continuing medical  
10 education (CME) on antibiotic use – similar to requirements for CME around opioid prescribing  
11 – may be helpful. However, other participants indicated that they would prefer voluntary rather  
12 than mandatory CME.  
13  
14  
15  
16  
17  
18  
19  
20  
21  
22  
23  
24  
25  
26  
27

### 28 ***Acceptability of Performance Reporting***

29  
30  
31  
32  
33 When presented with examples of stewardship efforts aimed at measuring and providing feedback  
34 on antibiotic prescribing practices, physicians were less supportive compared to educational  
35 efforts. A number of themes emerged in this area – both themes specific to antibiotic prescribing  
36 measurement, as well as themes regarding quality measurement efforts more broadly (Table 4).  
37  
38  
39  
40  
41  
42  
43  
44

### 45 ***Feasibility of measuring antibiotic prescribing***

46  
47 Participants expressed concerns about antibiotic stewardship activities focused on measuring  
48 inappropriate antibiotic use, questioning the feasibility of assessing prescribing quality while  
49 accounting for different patient populations. Some participants indicated that developing antibiotic  
50 use reports would likely require significant financial and time investments. Many participants  
51  
52  
53  
54  
55  
56  
57  
58  
59  
60

1  
2  
3 argued that antibiotic use measures are unlikely to capture all of the clinical elements from an  
4 office visit to provide the full context behind an antibiotic prescription, and that setting standards  
5 for the quality of antibiotic use would be difficult. Some questioned who would be qualified to set  
6 these standards and how that might impact the accuracy and fairness of antibiotic use measures.  
7  
8  
9  
10  
11  
12

### 13 14 *Belief that physicians will “game the system”*

15  
16 Participants also argued that, if antibiotic use measures were developed and implemented, other  
17 physicians would simply use the rules put in place to manipulate the desired outcome (i.e., “game  
18 the system”) to improve their antibiotic prescribing scores. Some participants indicated that  
19 physicians could easily identify what diagnosis codes they were being measured on and shift  
20 coding practices to more antibiotic-appropriate conditions.  
21  
22  
23  
24  
25  
26  
27  
28  
29

### 30 31 *Dissatisfaction with the quality measurement system*

32  
33 Many participants also expressed dissatisfaction and general distrust of quality measurement  
34 systems and reporting processes. Participants expressed a sense of feeling over-measured and  
35 being blamed for things beyond their control. Participants argued that quality measures assume  
36 that medicine is black and white and do not account for their need to use clinical judgment when  
37 treating patients. Some expressed concern that any new measure could eventually be turned around  
38 and used against them. Examples mentioned in different focus groups included using quality  
39 measures as a way to reimburse physicians at a lower level or a reason to fire a physician.  
40  
41  
42  
43  
44  
45  
46  
47  
48  
49

### 50 51 *Distrust of tracking and reporting systems*

1  
2  
3 Finally, participants described issues that they have experienced with the inaccuracy of tracking  
4 and reporting systems. For example, participants indicated that they often receive feedback reports  
5 that include patients that they have not seen in years, or feedback reports with clear coding errors.  
6  
7  
8 These inaccuracies lead them to generally dismiss the utility of these reports.  
9  
10  
11  
12  
13

## 14 **Discussion**

15  
16  
17  
18  
19 We conducted focus groups with PCPs to assess their knowledge and attitudes towards antibiotic  
20 resistance, inappropriate antibiotic prescribing, and outpatient antibiotic stewardship approaches.  
21  
22 While participants recognized the public health importance of antibiotic resistance and antibiotic  
23 use, they felt these issues were less important compared to other public health priorities in  
24 outpatient care. This finding echoes past research,[25-27] and adds further insight by placing  
25 antibiotic resistance within the broader context of public health issues encountered in primary care.  
26  
27 Our participants consistently identified antibiotic resistance as a lower priority for their practice  
28 compared to other health concerns. This is consistent with what has been shown in hospital-based  
29 studies, with one study identifying a lack of recognition of antibiotic resistance as an imminent  
30 threat as a barrier to stewardship.[36]  
31  
32  
33  
34  
35  
36  
37  
38  
39  
40  
41  
42  
43

44 Additionally, most study participants felt they were already good antibiotic stewards, but that their  
45 efforts were hindered by patient demand for antibiotics and the prescribing practices of other  
46 physicians. These findings are consistent with previous research on perceptions of drivers of  
47 outpatient antibiotic prescribing.[11-24] In particular, the perception of patient demand as a  
48 driving force behind inappropriate prescribing practices continues to be a consistent finding across  
49  
50  
51  
52  
53  
54  
55  
56  
57  
58  
59  
60

1  
2  
3 studies both in the U.S. and other countries. Similar perceptions have also been documented among  
4  
5 inpatient physicians who believe that prescribers outside of hospitals are primarily responsible for  
6  
7 antibiotic overuse and antibiotic resistance, underscoring the value for individual feedback on  
8  
9 prescribing patterns to help these physicians recognize the need for antibiotic stewardship in their  
10  
11 practice.[37] This indicates a continued need for stewardship efforts to address these concerns  
12  
13 moving forward.  
14  
15

16  
17  
18  
19 Along those lines, participants in our study reacted positively to education-focused stewardship  
20  
21 activities – particularly those activities aimed at educating the general public. Participants were  
22  
23 also supportive of education targeting physicians, such as trainings on how to best communicate  
24  
25 antibiotic prescribing decisions with patients. Additionally findings from inpatient studies also  
26  
27 suggest treatment guidelines can be an impactful educational tool for changing prescribing  
28  
29 behaviors.[38,39]  
30  
31

32  
33  
34  
35 In contrast to educational efforts, our study participants remained unconvinced about the utility of  
36  
37 antibiotic use tracking and reporting as a stewardship strategy. Participants' negative attitudes  
38  
39 regarding the feasibility of measuring the quality of antibiotic use in an accurate or fair manner,  
40  
41 and their distrust of the quality measurement system in the U.S. in general factored into  
42  
43 participants' perceptions on the impact of antibiotic use measurement. A previous study evaluating  
44  
45 pediatrician perceptions of an intervention that included audit and feedback of antibiotic  
46  
47 prescribing practices found high skepticism among physicians about the quality and accuracy of  
48  
49 the feedback reports.[12] Additional studies have evaluated physician perceptions of the broader  
50  
51 quality measurement system. One study of U.S. physicians in three states found that 71% felt that  
52  
53  
54  
55  
56  
57  
58  
59  
60

1  
2  
3 pediatric quality reports were effective at improving pediatric care.[40] However, in interviews  
4  
5 with providers in two of these states, authors found that physicians were frustrated with certain  
6  
7 aspects of the quality reports, such as the inclusion of measures that they felt were outside of their  
8  
9 control.[40] A 2009 survey of U.S. physicians on perceptions of Medicare's Physician Quality  
10  
11 Reporting Initiative (PQRI) found that 50% of physicians participating in PQRI programs believed  
12  
13 it had no impact on quality of care.[41]  
14  
15

16  
17  
18  
19 Many of our findings are consistent with research on self-enhancement bias—that people take full  
20  
21 credit for their success but are quick to dismiss failures as caused by external factors.[42,43] Self-  
22  
23 enhancement is adaptive because it protects against being discouraged or down on one's self,  
24  
25 preserves a person's self-image, and keeps them motivated to work and thrive in their life. This  
26  
27 may explain findings from our focus groups, including: (1) the physicians' belief that patients'  
28  
29 antibiotic knowledge deficits and other clinicians' behaviors were key drivers of overprescribing,  
30  
31 and (2) their defensive responses when confronted with the potential for reports of their own  
32  
33 prescribing by questioning the validity of the measurement enterprise. These perceptions present  
34  
35 a challenge when addressing inappropriate antibiotic prescribing. Some approaches that have been  
36  
37 successful in reducing antibiotic overprescribing invert the problem of self-enhancement by using  
38  
39 it as a way to encourage or reward appropriate prescribing. These interventions engender  
40  
41 reputational concerns when antibiotics are used or make explicit social comparisons of  
42  
43 performance with others to encourage pursuit of a positive self-image (e.g., the prospect of  
44  
45 becoming a "top performer") through lower prescribing.[44,45]  
46  
47  
48  
49  
50  
51  
52  
53  
54  
55  
56  
57  
58  
59  
60

1  
2  
3 This study provides important insight into current attitudes of primary care physicians in the  
4 United States on issues related to antibiotic resistance, inappropriate antibiotic prescribing, and  
5 antibiotic stewardship implementation. Enhanced understanding of perceptions amongst these  
6 providers is critical as healthcare stakeholders work to expand stewardship activities into primary  
7 care settings. Two of the four core elements for outpatient antibiotic stewardship are tracking and  
8 reporting antibiotic prescribing practices, and the provision of education and access to expertise  
9 on antibiotic prescribing.[10] While our study shows support from PCPs for educational initiatives,  
10 more work will be needed to address PCP concerns related to tracking and reporting antibiotic use.  
11 Healthcare stakeholders will need to work to build trust among the PCP community around  
12 antibiotic prescribing feedback, and will need to identify ways to make the feedback provided to  
13 physicians actionable to help ensure impact.  
14  
15  
16  
17  
18  
19  
20  
21  
22  
23  
24  
25  
26  
27  
28  
29  
30

31 Another important barrier to expanded stewardship implementation identified by this study is a  
32 continued lack of prioritization of this issue amongst PCPs. Healthcare stakeholders – including  
33 public health authorities, health plans, and health systems – will need to identify ways to  
34 incentivize stewardship uptake in primary care practices in the U.S.  
35  
36  
37  
38  
39  
40  
41

42 By conducting focus groups in cities across the U.S. and with internists, family medicine  
43 physicians, and pediatricians, we were able to gather data from a wide-range of perspectives. The  
44 consistent themes identified throughout the focus groups suggest that barriers to stewardship  
45 implementation may be similar across the United States.  
46  
47  
48  
49  
50  
51  
52  
53  
54  
55  
56  
57  
58  
59  
60

1  
2  
3 This study also has limitations. Because this is a qualitative study with a small sample size, these  
4 findings cannot be generalized to the broader PCP population. Participants were drawn from  
5 physician databases maintained for research purposes. Physicians who were recruited and who  
6 participated in these focus groups may have different or stronger opinions than those who did not.  
7  
8 Finally, this study evaluated physicians who specialized in family medicine, internal medicine, or  
9 pediatrics. We did not include other primary care clinicians, such as nurse practitioners or  
10 physician assistants. Additional research will be needed to assess whether these findings are  
11 applicable to the broader primary care clinician community.  
12  
13  
14  
15  
16  
17  
18  
19  
20  
21  
22  
23

24 In conclusion, the findings from these focus groups show that more work is needed to elevate the  
25 issue of antibiotic resistance and the need for improved prescribing among PCPs. Additionally,  
26 current skepticism among PCPs about the feasibility and accuracy of antibiotic use measurement  
27 may create concern around interventions that rely solely on tracking and reporting prescribing. It  
28 will be important to address these perceptions when designing interventions aimed at decreasing  
29 inappropriate antibiotic prescribing in outpatient settings.  
30  
31  
32  
33  
34  
35  
36  
37  
38

39 **Funding Statement:** This research received no specific grant from any funding agency in the  
40 public, commercial, or not-for-profit sectors.  
41

#### 42 **Conflict of Interest**

43

44 Dr. Linder, Dr. Gerber, and Dr. Doctor all received honoraria for time dedicated to this research  
45 project. Dr. Doctor has received consultant fees from Precision Health Economics and University  
46 of Pennsylvania Health System. Dr. Doctor was supported by grants from the National Institutes  
47 of on Aging (R21AG057395, R21AG057400, R21AG057396, R21AG057383, P30AG024968,  
48 R33AG057395), the National Institute on Drug Abuse (R01 DA046226), the National Institute  
49 of Arthrist and Musculoskeletal Conditions (R01 AR073486), the Agency for Healthcare  
50 Research and Quality (R01 HS026506) and the Patient-Centered Outcome Research Institute  
51 (CDRN-1306-04864). Dr. Linder was supported by grants from the National Institute on Aging  
52 (R21AG057400, R21AG057396, R21AG057383, R21AG057395), Agency for Healthcare  
53  
54  
55  
56  
57  
58  
59  
60

1  
2  
3 Research and Quality (R01HS024930, R01HS026506), The Peterson Center on Healthcare, and  
4 a contract from the Agency for Healthcare Research and Quality (HHSP2332015000201).  
5

### 6 **Contributors' Statement**

7  
8  
9 Ms. Zetts led the development of the study concept and design, participated in the analysis and  
10 interpretation of data, and drafted the manuscript.  
11

12 Ms. Stoesz participated in the analysis and interpretation of data and provided critical revision of  
13 the manuscript.  
14

15 Ms. Garcia provided input in the development of the study concept and design, participated in the  
16 interpretation of data, and provided critical revision of the manuscript.  
17

18 Dr. Doctor provided input in the development of the study concept and design, participated in the  
19 interpretation of data, and provided critical revision of the manuscript.  
20

21 Dr. Gerber provided input in the development of the study concept and design, participated in the  
22 interpretation of data, and provided critical revision of the manuscript.  
23

24 Dr. Linder provided input in the development of the study concept and design, participated in the  
25 interpretation of data, and provided critical revision of the manuscript.  
26

27 Dr. Hyun provided supervision in the development of the study concept and design, participated  
28 in the analysis and interpretation of data, and provided critical revision of the manuscript.  
29

30 **Data sharing statement:** No additional data beyond what is presented in the manuscript is  
31 available.  
32



## References

1. Suda KJ, Hicks LA, Roberts RM, Hunkler RJ, Matusiak LM, Schumock GT. Antibiotic Expenditures by Medication, Class, and Health Care Setting in the United States, 2010-2015. *Clin Infect Dis* 2018;66(2):185-190. doi:10.1093/cid/cix773.
2. Public Health England. English Surveillance Programme for Antimicrobial Utilisation and Resistance (ESPAUR): report 2014. [https://www.gov.uk/government/uploads/system/uploads/attachment\\_data/file/362374/ESPAUR\\_Report\\_2014\\_3.pdf](https://www.gov.uk/government/uploads/system/uploads/attachment_data/file/362374/ESPAUR_Report_2014_3.pdf) (accessed 18 April 2019).
3. Public Health Agency of Sweden, National Veterinary Institute. Consumption of antibiotics and occurrence of antibiotic resistance in Sweden. Swedres-Svarm 2014. Report No.: ISSN 1650-6332. <https://www.folkhalsomyndigheten.se/pagefiles/20281/Swedres-Svarm-2014-14027.pdf> (accessed 18 April 2019).
4. King LM, Bartoces M, Fleming-Dutra KE, Roberts RM, Hicks LA. Changes in US Outpatient Antibiotic Prescriptions from 2011-2016. *Clin Infect Dis* 2019. doi:10.1093/cid/ciz225.
5. Fleming-Dutra KE, Hersh AL, Shapiro DJ, et al. Prevalence of inappropriate antibiotic prescriptions among US ambulatory care visits, 2010-2011. *JAMA* 2016;315(17):1864-1873. doi:10.1001/jama.2016.4151.
6. Hersh AL, Fleming-Dutra KE, Shapiro DJ, Hyun DY, Hicks LA. Frequency of First-line Antibiotic Selection Among US Ambulatory Care Visits for Otitis Media, Sinusitis, and Pharyngitis. *JAMA Intern Med* 2016;176(12):1870-1872. doi:10.1001/jamainternmed.2016.6625.
7. Chua KP, Fischer MA, Linder JA. Appropriateness of outpatient antibiotic prescribing among privately insured US patients: ICD-10-CM based cross sectional study. *BMJ* 2019;364:k5092. doi:10.1136/bmj.k5092.
8. Palms DL, Hicks LA, Bartoces M, et al. Comparison of Antibiotic Prescribing in Retail Clinics, Urgent Care Centers, Emergency Departments, and Traditional Ambulatory Care Settings in the United States. *JAMA Intern Med* 2018;178(9):1267-1269. doi:10.1001/jamainternmed.2018.1632
9. Fischer MA, Mahersi M, Lii J, Linder JA. Invisible threats to improving antibiotic use: non-infection-related and non-visit-based antibiotic prescribing for Medicaid patients. *Health Aff* 2019;in press.
10. Centers for Disease Control and Prevention. The Core Elements of Outpatient Antibiotic Stewardship. <https://www.cdc.gov/antibiotic-use/community/improving-prescribing/core-elements/core-outpatient-stewardship.html>. Published 2016 (accessed 11 November 2018).
11. Sanchez GV, Roberts RM, Albert AP, Johnson DD, Hicks LA. Effects of knowledge, attitudes, and practices of primary care providers on antibiotic selection, United States. *Emerg Infect Dis* 2014;20(12):2041-2047. doi:10.3201/eid2012.140331.
12. Szymczak JE, Feemster KA, Zaoutis TE, Gerber JS. Pediatrician perceptions of an outpatient antimicrobial stewardship intervention. *Infect Control Hosp Epidemiol* 2014;35(suppl 3):S69-S78. doi:10.1086/677826.
13. Petursson P. GPs' reasons for "non-pharmacological" prescribing of antibiotics. A phenomenological study. *Scand J Prim Health Care* 2005;23(2):120-125. doi:10.1080/02813430510018491.

14. Evans CT, Rogers TJ, Weaver FM, Burns SP. Providers' beliefs and behaviors regarding antibiotic prescribing and antibiotic resistance in persons with spinal cord injury or disorder. *J Spinal Cord Med* 2011;34(1):16-21. doi:10.1179/107902610X12886261091794.
15. Dempsey PP, Businger AC, Whaley LE, Gagne JJ, Linder JA. Primary care clinicians' perceptions about antibiotic prescribing for acute bronchitis: a qualitative study. *BMC Fam Pract* 2014;15:194. doi: 10.1186/s12875-014-0194-5.
16. Butler CC, Rollnick S, Pill R, Maggs-Rapport F, Scott N. Understanding the culture of prescribing: qualitative study of general practitioners' and patients' perceptions of antibiotics for sore throats. *BMJ* 1998;317(7159):637-642. doi: 10.1136/bmj.317.7159.637.
17. May L, Gudger G, Armstrong P, et al. Multisite exploration of clinical decision making for antibiotic use by emergency medicine providers using quantitative and qualitative methods. *Infect Control Hosp Epidemiol* 2014;35(9):1114-1125. doi:10.1086/677637.
18. Bauchner H, Pelton SI, Klein JO. Parents, physicians, and antibiotic use. *Pediatrics* 1999;103(2):395-401.
19. Yates TD, David ME, Taylor YJ, et al. Not a magic pill: a qualitative exploration of provider perspectives on antibiotic prescribing in the outpatient setting. *BMC Fam Pract* 2018;19(1):96. doi: 10.1186/s12875-018-0788-4.
20. van der Zande MM, Dembinsky M, Aresi G, van Staa TP. General practitioners' accounts of negotiating antibiotic prescribing decisions with patients: a qualitative study on what influences antibiotic prescribing in low, medium and high prescribing practices. *BMC Fam Pract* 2019;20(1):172. doi: 10.1186/s12875-019-1065-x.
21. O'Doherty J, Leader LFW, O'Regan A, Dunne C, Puthooppambal SJ, O'Connor R. Over prescribing of antibiotics for acute respiratory tract infections; a qualitative study to explore Irish general practitioners' perspectives. *BMC Fam Pract* 2019;20(1):27. doi: 10.1186/s12875-019-0917-8.
22. Fletcher-Lartey S, Yee M, Gaarslev C, Khan R. Why do general practitioners prescribe antibiotics for upper respiratory tract infections to meet patient expectations: a mixed methods study. *BMJ Open* 2016;6(10):e012244. doi: 10.1136/bmjopen-2016-012244.
23. Rose J, Crosbie M, Stewart A. A qualitative literature review exploring the drivers influencing over-prescribing by GPs in primary care and recommendations to reduce unnecessary prescribing. *Perspect Public Health* 2019. [https://doi: 10.1177/1757913919879183](https://doi.org/10.1177/1757913919879183) (accessed 10 January 2020).
24. Sunde M, Nygaard MM, Høye S. General practitioners' attitudes towards municipal initiatives to improve antibiotic prescribing – a mixed-methods study. *Antibiotics (Basel)* 2019;8(3). doi: 10.3390/antibiotics8030120.
25. McCullough AR, Rathbone J, Parekh S, Hoffmann TC, Del Mar CB. Not in my backyard: a systematic review of clinicians' knowledge and beliefs about antibiotic resistance. *J Antimicrob Chemother* 2015;70(9):2465-2473. doi: 10.1093/jac/dkv164.
26. Wood F, Phillips C, Brookes-Howell L, et al. Primary care clinicians' perceptions of antibiotic resistance: a multi-country qualitative interview study. *J Antimicrob Chemother* 2013;68(1):237-243. doi:10.1093/jac/dks338.
27. Simpson SA, Wood F, Butler CC. General practitioners' perception of antimicrobial resistance: a qualitative study. *J Antimicrob Chemother* 2007;59(2):292-296. doi: 10.1093/jac/dkl467.

28. Centers for Disease Control and Prevention. Outpatient antibiotic prescriptions – United States, 2017. <https://www.cdc.gov/antibiotic-use/community/programs-measurement/state-local-activities/outpatient-antibiotic-prescriptions-US-2017.html> (accessed 10 January 2020).
29. Petterson S, McNellis R, Klink K, Meyers D, Bazemore A. The State of Primary Care in the United States: A Chartbook of Facts and Statistics. January 2018. <http://graham-center.org/content/dam/rgc/documents/publications-reports/reports/PrimaryCareChartbook.pdf> (accessed 10 January 2020).
30. Doty MM, Tikkanen R, Shah A, Schneider EC. Primary Care Physicians' Role in Coordinating Medical and Health-Related Social Needs in Eleven Countries. *Health Aff (Millwood)* 2020;39(1). <https://doi.org/10.1377/hlthaff.2019.01088> (accessed 10 January 2020).
31. O'Brian BC, Harris IB, Beckman TJ, Reed DA, Cook DA. Standards for reporting qualitative research: a synthesis of recommendations. *Acad Med* 2014;89(9):1245-1251.
32. Elo S, Kyngäs H. The qualitative content analysis process. *J Adv Nurs* 2008;62(1):107-115. doi:10.1111/j.1365-2648.2007.04569.x.
33. Bradley EH, Curry LA, Devers KJ. Qualitative data analysis for health services research: developing taxonomy, themes, and theory. *Health Serv Res* 2007;42(4):1758-72. doi:10.1111/j.1475-6773.2006.00684.x.
34. de Bont EG, Peetoom KK, Moser A, Francis NA, Dinant GJ, Cals JW. Childhood fever: a qualitative study on GPs' experiences during out-of-hours care. *Fam Pract* 2015;32(4):449-55. doi:10.1093/fampra/cmz029.
35. Teixeira Rodrigues A, Roque F, Falcão A, Figueiras A, Herdeiro MT. Understanding physician antibiotic prescribing behavior: a systematic review of qualitative studies. *Int J Antimicrob Agents* 2013;41(3):203-12. doi:10.1016/j.ijantimicag.2012.09.003.
36. Björkman I, Berg J, Röing M, Erntell M, Lundborg CS. Perceptions among Swedish hospital physicians on prescribing of antibiotics and antibiotic resistance. *Qual Saf Health Care* 2010;19(6):e8. doi:10.1136/qshc.2008.029199.
37. Krockow EM, Colman AM, Chattoe-Brown E, et al. Balancing the risks to individual and society: a systematic review and synthesis of qualitative research on antibiotic prescribing behavior in hospitals. *J Hosp Infect* 2019;101(4):428-439. doi:10.1016/j.jhin.2018.08.007.
38. Feiring E, Walter AB. Antimicrobial stewardship: a qualitative study of the development of national guidelines for antibiotic use in hospitals. *BMC Health Serv Res* 2017;17(1):747. doi:10.1186/s12913-017-2683-4.
39. Skodvin B, Aase K, Charani E, Holmes A, Smith I. An antimicrobial stewardship program initiative: a qualitative study on prescribing practices among hospital doctors. *Antimicrob Resist Infect Control* 2015;4:24. doi:10.1186/s13756-015-0065-4.
40. Zickafoose JS, Ireys HT, Swinburn A, Simpson LA. Primary Care Physicians' Experiences With and Attitudes Toward Pediatric Quality Reporting. *Acad Pediatr* 2016;16(8):750-759. doi:10.1016/j.acap.2016.07.005.
41. Federman AD, Keyhani S. Physicians' participation in the Physician' Quality Reporting Initiative and their perceptions of its impact on quality of care. *Health Policy* 2011;102(2-3):229-234. doi:10.1016/j.healthpol.2011.05.003.
42. Brown JD. Evaluations of Self and Others: Self-Enhancement Biases in Social Judgments. *Soc Cogn* 1986;4(4):353-376. doi:10.1521/soco.1986.4.4.353.
43. John OP, Robins RW. Accuracy and bias in self-perception: individual differences in self-enhancement and the role of narcissism. *J Pers Soc Psychol* 1994;66(1):206-219. doi:10.1037/0022-3514.66.1.206.

- 1  
2  
3 44. Meeker D, Linder JA, Fox CR, et al. Effects of Behavioral Interventions on Inappropriate  
4 Antibiotic Prescribing Among Primary Care Practices: A Randomized Clinical Trial. *JAMA*  
5 2016;315(6):562-70. doi:10.1001/jama.2016.0275.  
6  
7 45. Linder JA, Meeker D, Fox CR, et al. Effects of Behavioral Interventions on Inappropriate  
8 Antibiotic Prescribing in Primary Care 12 Months After Stopping Interventions. *JAMA*  
9 2017;318(14):1391-1392. doi:10.1001/jama.2017.11152.  
10  
11  
12  
13  
14  
15  
16  
17  
18  
19  
20  
21  
22  
23  
24  
25  
26  
27  
28  
29  
30  
31  
32  
33  
34  
35  
36  
37  
38  
39  
40  
41  
42  
43  
44  
45  
46  
47  
48  
49  
50  
51  
52  
53  
54  
55  
56  
57  
58  
59  
60

For peer review only

**Table 1. Themes and quotations from primary care physicians regarding antibiotic resistance as a public health issue**

| Themes                                                                                                               | Quotations                                                                                                                                                                                                                                                                                                                                                                                                                                                                                                                                                                                                                                                                                                                                                                                                                                                                                                                                                                                         |
|----------------------------------------------------------------------------------------------------------------------|----------------------------------------------------------------------------------------------------------------------------------------------------------------------------------------------------------------------------------------------------------------------------------------------------------------------------------------------------------------------------------------------------------------------------------------------------------------------------------------------------------------------------------------------------------------------------------------------------------------------------------------------------------------------------------------------------------------------------------------------------------------------------------------------------------------------------------------------------------------------------------------------------------------------------------------------------------------------------------------------------|
| <i>Antibiotic resistance seen as less important than other public health issues faced by primary care physicians</i> | <p>(1) “We are seeing some MRSA. Everybody does. It is just so low on the totem pole compared to the other things that we are seeing. – Birmingham, family medicine/internal medicine physician</p> <p>(2) “It’s important, but in everyday practice I thought that other things were more important.” – Chicago, pediatrician</p>                                                                                                                                                                                                                                                                                                                                                                                                                                                                                                                                                                                                                                                                 |
| <i>Antibiotic resistance is an issue, but not for my patient population</i>                                          | <p>(1) “I thought about antibiotic resistance as more of a problem, not in my practice that much, but in a hospital with a very sick person where they can’t find something because somebody’s resistant.” – Chicago, pediatrician</p> <p>(2) “It’s not like I’m seeing my patients having an issue on a regular basis like these other things are. There’s this threat of this crazy super bug that will take over the world and kill us all, but I’ve never – it doesn’t seem like reality. – Philadelphia, family medicine/internal medicine physician</p> <p>(3) “We’re starting to see it in the community. I think if you had a table full of infectious disease doctors working in intensive care units, you would have different priorities. But in the outpatient, we probably see it less [...] It is a matter of time before we see it more. Who knows, a year, two, three from now, these numbers might be different.” – Philadelphia, family medicine/internal medicine physician</p> |

**Table 2. Themes and quotations from primary care physicians regarding drivers antibiotic prescribing**

| Themes                                                               | Quotations                                                                                                                                                                                                                                                                                                                                                                                                                                                                                                                                                                                                                                                                                                                                                                                                                                                                     |
|----------------------------------------------------------------------|--------------------------------------------------------------------------------------------------------------------------------------------------------------------------------------------------------------------------------------------------------------------------------------------------------------------------------------------------------------------------------------------------------------------------------------------------------------------------------------------------------------------------------------------------------------------------------------------------------------------------------------------------------------------------------------------------------------------------------------------------------------------------------------------------------------------------------------------------------------------------------|
| <i>Attribution of inappropriate antibiotic prescribing to others</i> | <p>(1) “I think those of us who have our own practice and control of things probably [...] ‘get it’ more than the hourly non-vested person in your walk-in clinics who are just basically drawing an hourly salary and their whole interest is in just getting rid of somebody.” – Birmingham, family medicine/internal medicine physician</p> <p>(2) “We’re always practicing evidence-based medicine, so it becomes incredibly challenging. With adult medicine, they’ll give out antibiotics over the phone, antibiotics without doing swabs and chest X-rays, things like that, or even seeing the patient.” – Chicago, pediatrician</p> <p>(3) “A lot of us don’t like to prescribe antibiotics, but they go to urgent cares and they go to [...] one-minute clinics and they get prescribed antibiotics.” – Los Angeles, family medicine/internal medicine physician</p> |
| <i>Patient demand as a driving factor</i>                            | <p>(1) “We’re under pressure all day. You don’t want to get written up, potentially, for being insensitive, or not taking care of them, or physician ratings.” – Birmingham, pediatrician</p> <p>(2) “They come in and it’s a boxing match. You are fighting in that corner with the misconception, preconceived notion and you’re trying to tell them that 2 + 2 = 4 and they are saying, “No, it’s purple”. – Birmingham, family medicine/internal medicine physician</p> <p>(3) “Sometimes you just like, you know what, I’m beaten down; so, here’s your Z-Pak. See you. Next patient. I’m not going to sit here and argue with somebody for five minutes over why they don’t need it.” – Philadelphia, family medicine/internal medicine physician</p>                                                                                                                    |

**Table 3. Themes and quotations from primary care physicians regarding patient and physician education as antibiotic stewardship activities**

| Themes                                      | Quotations                                                                                                                                                                                                                                                                                                                                                                                                                                                                                                                                                                                                                                       |
|---------------------------------------------|--------------------------------------------------------------------------------------------------------------------------------------------------------------------------------------------------------------------------------------------------------------------------------------------------------------------------------------------------------------------------------------------------------------------------------------------------------------------------------------------------------------------------------------------------------------------------------------------------------------------------------------------------|
| <i>Need for patient education</i>           | <p>(1) “It will not work unless you educate the population. You cannot attack the doctors and curtail what they are doing until you educate patients that your doctor is doing the right thing.” – Birmingham, family medicine/internal medicine physician</p> <p>(2) “I think it’s more education. I think you could probably do more with a commercial than you can with anything else.” – Chicago, pediatrician</p>                                                                                                                                                                                                                           |
| <i>Acceptability of physician education</i> | <p>(1) “Parents are going to ask. They don’t know what’s right or wrong. They’re not medically trained. It’s the physicians that need more education about not prescribing.” – Chicago, pediatrician</p> <p>(2) “I think the best education strategy we could get and maybe there could be a study done is how, what is the best way to communicate to patients that antibiotic overprescribing and resistance is a problem and that rings true to them, that we can tell them this and they’re going to understand that and accept the fact that it didn’t lead to antibiotics.” – Los Angeles, family medicine/internal medicine physician</p> |

**Table 4. Themes and quotations from primary care physicians regarding the acceptability of performance reporting**

|                                                                   |                                                                                                                                                                                                                                                                                                                                                                                                                                                                                                                                                                                                                                                                                                                                                                                                                                                                                   |
|-------------------------------------------------------------------|-----------------------------------------------------------------------------------------------------------------------------------------------------------------------------------------------------------------------------------------------------------------------------------------------------------------------------------------------------------------------------------------------------------------------------------------------------------------------------------------------------------------------------------------------------------------------------------------------------------------------------------------------------------------------------------------------------------------------------------------------------------------------------------------------------------------------------------------------------------------------------------|
| <p><i>Feasibility of measuring antibiotic prescribing</i></p>     | <p>(1) “Like I said, you’ll get patients who were seen within hours by 2 different people, and one gives the antibiotic and the other one doesn’t. It’s not necessarily that the person who doesn’t give it is always right, and the other one’s always wrong. It’s too subjective.” – Chicago, pediatrician</p> <p>(2) “There’s more thought process into the physician having to, there’s a reason basically why a physician chooses or not chooses to, the management specifically. So, until they actually come and look at our, the history, the physical, and overall clinical management, they really will not know why we prescribed the way we did it.” – Los Angeles, family medicine/internal medicine physician</p>                                                                                                                                                   |
| <p><i>Belief that physicians will “game the system”</i></p>       | <p>(1) “As soon as you start having measurements like that, you’re going to have a lot more diagnoses of walking pneumonia or pneumonia.” – Los Angeles, family medicine/internal medicine physician</p> <p>(2) “People don’t put down accurate diagnoses, and then when you have something like this, then everyone is going to start gaming the system. ‘I’m not going to put down diagnosis of bronchitis. No, I’m going to put sinusitis.’ Even through it’s bronchitis, I can give you the antibiotic and not get dinged for it.” – Philadelphia, family medicine/internal medicine physician</p>                                                                                                                                                                                                                                                                            |
| <p><i>Dissatisfaction with the quality measurement system</i></p> | <p>(1) “These days we’re all getting measured on everything. Every time we click a button on the EMR whether it’s diabetes, cholesterol, blood pressure, antibiotic prescribing, no matter what it is someone’s measuring it. Someone’s telling us what we should be doing. I think, I’ll speak for myself; physicians are starting to get tired of being told what to do.” – Philadelphia, family medicine/internal medicine physician</p> <p>(2) “That’s going to fall into a P for P program. A payment for performance which is the insurance company’s way of paying doctors less money.” – Los Angeles, pediatrician</p> <p>(3) “We’ve discovered that they don’t work very well, and then, almost always if there’s an incentive for doing something, there’s going to be a punishment for not doing it. There’s never just the incentive.” – Birmingham, pediatrician</p> |
| <p><i>Distrust of tracking and reporting systems</i></p>          | <p>(1) “For example, I vaccinate every kid that comes to see me with Menactra [...] [Insurance company] recently said that I did not get 23 kids, but when I go to the state registry, every single one of those kids got their Menactra, before the age of 13. Their data collection practices are questionable and manipulable, and I don’t trust it.” – Birmingham, pediatrician</p>                                                                                                                                                                                                                                                                                                                                                                                                                                                                                           |



1  
2  
3  
4  
5  
6  
7  
8  
9  
10  
11  
12  
13  
14  
15  
16  
17  
18  
19  
20  
21  
22  
23  
24  
25  
26  
27  
28  
29  
30  
31  
32  
33  
34  
35  
36  
37  
38  
39  
40  
41  
42  
43  
44  
45  
46  
47  
48  
49  
50  
51  
52  
53  
54  
55  
56  
57  
58  
59  
60

|  |                                                                                                                                                                                                                                                                                                                                     |
|--|-------------------------------------------------------------------------------------------------------------------------------------------------------------------------------------------------------------------------------------------------------------------------------------------------------------------------------------|
|  | (2) “The quality of the data seems always so poor [...] I have patients that I’ve never seen that are on my list, I had a patient that was dead for 2 years that was on my list. So the quality of the data collection and how you’re going to do that is so important.” – Los Angeles, family medicine/internal medicine physician |
|--|-------------------------------------------------------------------------------------------------------------------------------------------------------------------------------------------------------------------------------------------------------------------------------------------------------------------------------------|

For peer review only

# Reporting checklist for qualitative study.

Based on the SRQR guidelines.

## Instructions to authors

Complete this checklist by entering the page numbers from your manuscript where readers will find each of the items listed below.

Your article may not currently address all the items on the checklist. Please modify your text to include the missing information. If you are certain that an item does not apply, please write "n/a" and provide a short explanation.

Upload your completed checklist as an extra file when you submit to a journal.

In your methods section, say that you used the SRQR reporting guidelines, and cite them as:

O'Brien BC, Harris IB, Beckman TJ, Reed DA, Cook DA. Standards for reporting qualitative research: a synthesis of recommendations. *Acad Med.* 2014;89(9):1245-1251.

|                     | Reporting Item                                                                                                                                                                                                                                          | Page Number |
|---------------------|---------------------------------------------------------------------------------------------------------------------------------------------------------------------------------------------------------------------------------------------------------|-------------|
| <b>Title</b>        |                                                                                                                                                                                                                                                         |             |
|                     | <a href="#">#1</a> Concise description of the nature and topic of the study identifying the study as qualitative or indicating the approach (e.g. ethnography, grounded theory) or data collection methods (e.g. interview, focus group) is recommended | 1           |
| <b>Abstract</b>     |                                                                                                                                                                                                                                                         |             |
|                     | <a href="#">#2</a> Summary of the key elements of the study using the abstract format of the intended publication; typically includes background, purpose, methods, results and conclusions                                                             | 2-3         |
| <b>Introduction</b> |                                                                                                                                                                                                                                                         |             |
| Problem formulation | <a href="#">#3</a> Description and significance of the problem / phenomenon studied: review of relevant theory and empirical work; problem statement                                                                                                    | 4-6         |

|    |                           |                     |                                                           |         |
|----|---------------------------|---------------------|-----------------------------------------------------------|---------|
| 1  | Purpose or research       | <a href="#">#4</a>  | Purpose of the study and specific objectives or           | 6       |
| 2  | question                  |                     | questions                                                 |         |
| 3  |                           |                     |                                                           |         |
| 4  | <b>Methods</b>            |                     |                                                           |         |
| 5  |                           |                     |                                                           |         |
| 6  |                           |                     |                                                           |         |
| 7  | Qualitative approach and  | <a href="#">#5</a>  | Qualitative approach (e.g. ethnography, grounded          | 6-7, 20 |
| 8  | research paradigm         |                     | theory, case study, phenomenology, narrative              |         |
| 9  |                           |                     | research) and guiding theory if appropriate; identifying  |         |
| 10 |                           |                     | the research paradigm (e.g. postpositivist,               |         |
| 11 |                           |                     | constructivist / interpretivist) is also recommended;     |         |
| 12 |                           |                     | rationale. The rationale should briefly discuss the       |         |
| 13 |                           |                     | justification for choosing that theory, approach,         |         |
| 14 |                           |                     | method or technique rather than other options             |         |
| 15 |                           |                     | available; the assumptions and limitations implicit in    |         |
| 16 |                           |                     | those choices and how those choices influence study       |         |
| 17 |                           |                     | conclusions and transferability. As appropriate the       |         |
| 18 |                           |                     | rationale for several items might be discussed            |         |
| 19 |                           |                     | together.                                                 |         |
| 20 |                           |                     |                                                           |         |
| 21 |                           |                     |                                                           |         |
| 22 |                           |                     |                                                           |         |
| 23 |                           |                     |                                                           |         |
| 24 |                           |                     |                                                           |         |
| 25 |                           |                     |                                                           |         |
| 26 |                           |                     |                                                           |         |
| 27 | Researcher                | <a href="#">#6</a>  | Researchers' characteristics that may influence the       | 7       |
| 28 | characteristics and       |                     | research, including personal attributes, qualifications / |         |
| 29 | reflexivity               |                     | experience, relationship with participants,               |         |
| 30 |                           |                     | assumptions and / or presuppositions; potential or        |         |
| 31 |                           |                     | actual interaction between researchers'                   |         |
| 32 |                           |                     | characteristics and the research questions, approach,     |         |
| 33 |                           |                     | methods, results and / or transferability                 |         |
| 34 |                           |                     |                                                           |         |
| 35 |                           |                     |                                                           |         |
| 36 |                           |                     |                                                           |         |
| 37 |                           |                     |                                                           |         |
| 38 |                           |                     |                                                           |         |
| 39 | Context                   | <a href="#">#7</a>  | Setting / site and salient contextual factors; rationale  | 6-7     |
| 40 |                           |                     |                                                           |         |
| 41 | Sampling strategy         | <a href="#">#8</a>  | How and why research participants, documents, or          | 6-7     |
| 42 |                           |                     | events were selected; criteria for deciding when no       |         |
| 43 |                           |                     | further sampling was necessary (e.g. sampling             |         |
| 44 |                           |                     | saturation); rationale                                    |         |
| 45 |                           |                     |                                                           |         |
| 46 |                           |                     |                                                           |         |
| 47 |                           |                     |                                                           |         |
| 48 | Ethical issues pertaining | <a href="#">#9</a>  | Documentation of approval by an appropriate ethics        | 8       |
| 49 | to human subjects         |                     | review board and participant consent, or explanation      |         |
| 50 |                           |                     | for lack thereof; other confidentiality and data security |         |
| 51 |                           |                     | issues                                                    |         |
| 52 |                           |                     |                                                           |         |
| 53 |                           |                     |                                                           |         |
| 54 |                           |                     |                                                           |         |
| 55 | Data collection methods   | <a href="#">#10</a> | Types of data collected; details of data collection       | 8-9     |
| 56 |                           |                     | procedures including (as appropriate) start and stop      |         |
| 57 |                           |                     | dates of data collection and analysis, iterative          |         |
| 58 |                           |                     |                                                           |         |
| 59 |                           |                     |                                                           |         |
| 60 |                           |                     |                                                           |         |

|    |                              |                                                                           |       |
|----|------------------------------|---------------------------------------------------------------------------|-------|
| 1  |                              | process, triangulation of sources / methods, and                          |       |
| 2  |                              | modification of procedures in response to evolving                        |       |
| 3  |                              | study findings; rationale                                                 |       |
| 4  |                              |                                                                           |       |
| 5  | Data collection              | <a href="#">#11</a> Description of instruments (e.g. interview guides,    | 8-9   |
| 6  | instruments and              | questionnaires) and devices (e.g. audio recorders)                        |       |
| 7  | technologies                 | used for data collection; if / how the instruments(s)                     |       |
| 8  |                              | changed over the course of the study                                      |       |
| 9  |                              |                                                                           |       |
| 10 |                              |                                                                           |       |
| 11 | Units of study               | <a href="#">#12</a> Number and relevant characteristics of participants,  | 7, 10 |
| 12 |                              | documents, or events included in the study; level of                      |       |
| 13 |                              | participation (could be reported in results)                              |       |
| 14 |                              |                                                                           |       |
| 15 | Data processing              | <a href="#">#13</a> Methods for processing data prior to and during       | 9     |
| 16 |                              | analysis, including transcription, data entry, data                       |       |
| 17 |                              | management and security, verification of data                             |       |
| 18 |                              | integrity, data coding, and anonymisation /                               |       |
| 19 |                              | deidentification of excerpts                                              |       |
| 20 |                              |                                                                           |       |
| 21 | Data analysis                | <a href="#">#14</a> Process by which inferences, themes, etc. were        | 9     |
| 22 |                              | identified and developed, including the researchers                       |       |
| 23 |                              | involved in data analysis; usually references a specific                  |       |
| 24 |                              | paradigm or approach; rationale                                           |       |
| 25 |                              |                                                                           |       |
| 26 | Techniques to enhance        | <a href="#">#15</a> Techniques to enhance trustworthiness and credibility | 9     |
| 27 | trustworthiness              | of data analysis (e.g. member checking, audit trail,                      |       |
| 28 |                              | triangulation); rationale                                                 |       |
| 29 |                              |                                                                           |       |
| 30 |                              |                                                                           |       |
| 31 |                              |                                                                           |       |
| 32 |                              |                                                                           |       |
| 33 | <b>Results/findings</b>      |                                                                           |       |
| 34 |                              |                                                                           |       |
| 35 | Syntheses and                | <a href="#">#16</a> Main findings (e.g. interpretations, inferences, and  | 10-16 |
| 36 | interpretation               | themes); might include development of a theory or                         |       |
| 37 |                              | model, or integration with prior research or theory                       |       |
| 38 |                              |                                                                           |       |
| 39 | Links to empirical data      | <a href="#">#17</a> Evidence (e.g. quotes, field notes, text excerpts,    | 26-30 |
| 40 |                              | photographs) to substantiate analytic findings                            |       |
| 41 |                              |                                                                           |       |
| 42 |                              |                                                                           |       |
| 43 |                              |                                                                           |       |
| 44 |                              |                                                                           |       |
| 45 | <b>Discussion</b>            |                                                                           |       |
| 46 |                              |                                                                           |       |
| 47 | Intergration with prior      | <a href="#">#18</a> Short summary of main findings; explanation of how    | 16-18 |
| 48 | work, implications,          | findings and conclusions connect to, support,                             |       |
| 49 | transferability and          | elaborate on, or challenge conclusions of earlier                         |       |
| 50 | contribution(s) to the field | scholarship; discussion of scope of application /                         |       |
| 51 |                              |                                                                           |       |
| 52 |                              |                                                                           |       |
| 53 |                              |                                                                           |       |
| 54 |                              |                                                                           |       |
| 55 |                              |                                                                           |       |
| 56 |                              |                                                                           |       |
| 57 |                              |                                                                           |       |
| 58 |                              |                                                                           |       |
| 59 |                              |                                                                           |       |
| 60 |                              |                                                                           |       |

generalizability; identification of unique contributions(s) to scholarship in a discipline or field

|    |                       |                     |                                                                                                                      |
|----|-----------------------|---------------------|----------------------------------------------------------------------------------------------------------------------|
| 1  |                       |                     |                                                                                                                      |
| 2  |                       |                     |                                                                                                                      |
| 3  |                       |                     |                                                                                                                      |
| 4  | Limitations           | <a href="#">#19</a> | Trustworthiness and limitations of findings 19-20                                                                    |
| 5  |                       |                     |                                                                                                                      |
| 6  | <b>Other</b>          |                     |                                                                                                                      |
| 7  |                       |                     |                                                                                                                      |
| 8  |                       |                     |                                                                                                                      |
| 9  | Conflicts of interest | <a href="#">#20</a> | Potential sources of influence of perceived influence on study conduct and conclusions; how these were managed 20-21 |
| 10 |                       |                     |                                                                                                                      |
| 11 |                       |                     |                                                                                                                      |
| 12 |                       |                     |                                                                                                                      |
| 13 |                       |                     |                                                                                                                      |
| 14 | Funding               | <a href="#">#21</a> | Sources of funding and other support; role of funders in data collection, interpretation and reporting 20            |
| 15 |                       |                     |                                                                                                                      |
| 16 |                       |                     |                                                                                                                      |
| 17 |                       |                     |                                                                                                                      |

18 None The SRQR checklist is distributed with permission of Wolters Kluwer © 2014 by the Association  
 19 of American Medical Colleges. This checklist can be completed online using  
 20 <https://www.goodreports.org/>, a tool made by the [EQUATOR Network](#) in collaboration with  
 21 [Penelope.ai](#)  
 22  
 23  
 24  
 25  
 26  
 27  
 28  
 29  
 30  
 31  
 32  
 33  
 34  
 35  
 36  
 37  
 38  
 39  
 40  
 41  
 42  
 43  
 44  
 45  
 46  
 47  
 48  
 49  
 50  
 51  
 52  
 53  
 54  
 55  
 56  
 57  
 58  
 59  
 60

## Supplementary File #2

### Antibiotic Stewardship Moderator's Guide

*Modified format for manuscript submission*

#### 1. Introduction

- a. Background: mirrors, taps
- b. Introduction of moderator, participants: name, years in practice, practice size, practice ownership (physician vs. hospital-owned), personal ownership status (i.e., employee vs. full/part owner)

#### 2. Perceived Importance of Antibiotic Resistance as a Public Health Issue

- a. As physicians, you confront a myriad of public health issues that impact you and your patient care daily. I want to discuss some of those issues, so I can understand where your areas of greatest concerns are focused.
- b. Exercise #1

#### **Exercise #1**

Moderator will hand out Sheet A with the listing the following topics:

- Overweight and obesity
- Antibiotic resistance
- Misinformation about childhood vaccines (pediatricians only)
- Opioid abuse
- Diabetes
- Patient non-compliance with drug regimens
- Smoking and tobacco use

#### Questions

1. On your sheet, would you please rank the public health issue from most important to least important? Put a 1 next to the most important, 2 for the next most important, etc. to the least important of these topics.
2. Moderator goes around the room to get the scores, does a quick tally, and determines where antibiotic resistance falls within the list of public health issues.
3. Overall, most of you have put antibiotic resistance as X in the list. Tell me why you believe it is important. What are your concerns about antibiotic resistance in the near term, say in the next 2-3 years? What about the next 10 years? Why isn't it higher on the list? Do you think that in 10 years it will be higher on the list?

- c. What do you hear from colleagues and fellow physicians about antibiotic use and antibiotic resistance? Is it a subject of conversation when physicians get together? How much of an issue is it for you in your practice?

#### 3. Attitudes and Perceptions of Antibiotics

- 1
  - 2
  - 3
  - 4
  - 5
  - 6
  - 7
  - 8
  - 9
  - 10
  - 11
  - 12
  - 13
  - 14
  - 15
  - 16
  - 17
  - 18
  - 19
  - 20
  - 21
  - 22
  - 23
  - 24
  - 25
  - 26
  - 27
  - 28
  - 29
  - 30
  - 31
  - 32
  - 33
  - 34
  - 35
  - 36
  - 37
  - 38
  - 39
  - 40
  - 41
  - 42
  - 43
  - 44
  - 45
  - 46
  - 47
  - 48
  - 49
  - 50
  - 51
  - 52
  - 53
  - 54
  - 55
  - 56
  - 57
  - 58
  - 59
  - 60
- a. When you are deciding whether or not to prescribe an antibiotic for a patient, what are some of the factors you consider? (e.g., confidence in diagnosis [viral vs. bacterial infection], side effects associated with antibiotic use, AE risks such as C. diff, public health concerns such as antibiotic resistance)
    - i. When patients present with ambiguous symptoms (i.e., ones that could be associated with bacterial or viral infections), do you see prescribing antibiotics for these patients as the safer option than doing nothing?
    - ii. How often do adverse events or side effects associated with antibiotic use override the benefit of prescribing the antibiotic?
    - iii. When those arise, what are your options for the patient?
  - b. Do you talk to your patients about the potential adverse events before you decide to prescribe?
    - i. Is it more often the patient, or yourself who is concerned about adverse events?
  - c. How often in the past two months have you spoken to patients about the appropriate use of antibiotics, efficacy, resistance?
  - d. Have you denied anyone antibiotics in the past two months who wanted them?
    - i. Could you walk me through one of those conversations? For instance, if I am your patient, how would you talk to me about this?
    - ii. What motivates this discussion?
    - iii. How often does the issue of antibiotic overuse, or antibiotic resistance come up in these discussions?
    - iv. How long, on average, does this type of discussion take? How much pushback do you receive from patients?

#### 4. Antibiotic Stewardship Definition

##### a. Exercise #3

#### **Exercise #3**

Please write down on your pad, what antibiotic stewardship means to you. Even if it's not a term you're familiar with, just jot down a sentence about what you believe it means.

Moderator will go around the room and have each participant read aloud their definition, if they have one. Moderator will then provide the following definition (verbally and in writing):

“Activities that aim to ensure that antibiotics are used only when indicated and, when needed, that the most appropriate antibiotic is prescribed at the right dose and duration of therapy.”

Question: Do you have any thoughts on that?

##### b. Exercise #4

#### **Exercise #4**

Moderator will hand out Sheet B

Questions:

1. Do these data match with your thoughts about antibiotic resistance?
2. What matches what you believe? What is different?
3. Do these points make sense to you as the basic tenets of antibiotic stewardship? Do you think there is anything that shouldn't be these? Anything that is missing?

5. Elements of Antibiotic Stewardship (15 minutes)

a. Exercise #5

**Exercise #5**

Moderator will hand out modified versions of pages 16-24 of the Centers for Disease Control and Prevention's Core Elements of Outpatient Antibiotic Stewardship (<https://www.cdc.gov/antibiotic-use/community/improving-prescribing/core-elements/core-outpatient-stewardship.html>).

Questions:

1. I'm going to hand out some pages from the Elements of Antibiotic Stewardship. I know this is quite a bit to go through. If you will please read through this – focus on the bolded sentence and just scan the text below it. As you are reading, circle the phrases or sentences that attract you to the activity, that increase your interest in participating. If you would also cross out any phrases or sentences that you think would present a problem for you, be obstacles or would decrease your interest in the program.
2. For each element, moderator will ask for (1) Overall reaction; (2) What areas did you like – what was circled; (3) What areas did you think were obstacles or that you disliked?

6. Current/Past Stewardship or Quality Improvement Activities (15 minutes)

- a. Are you doing any kind of stewardship or quality improvement activities in your practice currently related to antibiotic prescribing or treatment, or any other disease area quality improvement activities?
  - i. Describe those to me.
  - ii. If no antibiotic related QA activities – probe for other areas of QA activities. In descriptions, include things like data collection, analysis, interpretation, personnel used, outside consulting used, design and implementation of activities, outcomes, cost and funding.
- b. In your practice, is there dedicated or protected time to perform quality improvement activities? This is for any area, not just antibiotics.
- c. Is there any dedicated expertise on staff for quality improvement activities? (probe if needed: like a data analyst)
- d. Is there any dedicated funding for quality improvement activities?
- e. What is your motivation for implementing quality improvement activities?



7. Tools for Adoption of Antibiotic Stewardship (15 minutes)

## a. Exercise #6

**Exercise #6**

Moderator will hand out Sheet C

## Questions:

1. On this sheet I have listed a number of the issues we have discussed. I'd like you to think about your own practice and for each of the items, check whether you have access to each potential tool. If you do have access to a tool, please indicated whether you currently use this tool to support antibiotic stewardship activities and make a few notes as to why you do or don't. If you do not have access to a tool, please indicate the level of burden it would be to develop this tool for your practice.
2. Moderator will go around the room and determine the top two or three tools to discuss.
3. For each: What makes this tool such as big burden? What are some ideas you have that might help with this? Do you think it would be a serious impediment to implementing antibiotic stewardship?

8. Policies/Tools to Encourage the Adoption of Antibiotic Stewardship (15 minutes)

## a. Exercise #7

**Exercise #7**

Moderator will hand out Sheet D

## Questions:

1. There are a number of potential resources to support your efforts in the appropriate use of antibiotics. I'm going to hand out a list that I'd like you to read. Next to each item in the list is a rating scale of 1 to 5. Please check the box for each resource that describes how motivating each of these is for you. 1 means not at all useful. 5 means very useful. You can use any number in between. When you're done, we'll discuss it.
2. Moderator will collect the ratings and run a quick tally. Discussion will then start with the statement that is most motivating and work down from there.
3. Statement X has the greatest number of you giving it a high score. Those of you that gave it a high score, tell me what about X is the most useful. Are there any problem with it? (Moderator will then continue on for each of the 8 remaining statements.)
4. Is there anything that isn't on this list that you have seen utilized for other quality improvement programs that you think might be effective here?

- 1  
2  
3 b. Realistically, without external aid/requirements, what is the likelihood of your adopting  
4 voluntary antibiotic stewardship activities? (defined as having the elements discussed  
5 previously: data tracking and reporting, development and implementation of improvement  
6 activities, education/training of providers and staff, etc.)  
7  
8 c. Do patient satisfaction scores influence your decision-making around prescribing  
9 antibiotics? What kind and how much of an impact do they have?  
10  
11 d. If you wanted to implement antibiotic stewardship activities in your practice, or just  
12 improve your antibiotic prescribing, what do you think would be helpful to you?  
13 i. Toolkits on how to implement antibiotic stewardship interventions?  
14 ii. Feedback on antibiotic prescribing patterns in your area/practice?  
15 iii. Incentives from payers?  
16 iv. Other?  
17

18 9. Quality Measures for Appropriate Antibiotic Use (10 minutes)  
19

- 20 a. Our last subject today is quality measures. How familiar would you say you are with the  
21 Healthcare Effectiveness Data and Information Set (HEDIS) published by the National  
22 Committee for Quality Assurance (NCQA).  
23 i. For antibiotics, other disease areas?  
24 ii. Do you report HEDIS measures related to antibiotic use as part of your quality  
25 reporting?  
26 iii. Do you believe that these measures appropriately capture your antibiotic prescribing  
27 practices? Is the HEDIS measure accurate for your practice? (e.g., Bronchitis (adults)  
28 and upper respiratory infections (children)) If the participants indicate they do not  
29 think these measures accurately capture their prescribing, ask what would be needed  
30 for them to trust these data?  
31  
32 b. At your practice, are there direct/individual financial incentives for you – i.e., bonuses –  
33 tied to your performance on quality measures (antibiotics or otherwise)? In your opinion,  
34 do they work?  
35  
36 c. If antibiotic use quality measures were among the measures you can choose from to report  
37 to public (CMS) or private health plans as part of quality reporting requirements, how likely  
38 is it that you will select antibiotic quality measures vs. other quality measures?  
39  
40

41 10. Thank and end group  
42

43 **Sheet A**  
44

45

|                                                                    |                                                          |
|--------------------------------------------------------------------|----------------------------------------------------------|
|                                                                    | Ranking 1-6<br>1 = most important<br>6 = least important |
| A. Overweight and Obesity                                          |                                                          |
| B. Opioid Abuse                                                    |                                                          |
| C. Antibiotic Resistance                                           |                                                          |
| D. Misinformation About Childhood<br>Vaccines (pediatricians only) |                                                          |
| E. Diabetes                                                        |                                                          |

46  
47  
48  
49  
50  
51  
52  
53  
54  
55  
56  
57  
58  
59  
60

|                                              |  |
|----------------------------------------------|--|
| F. Patient Non-Compliance with Drug Regimens |  |
| G. Smoking and Tobacco Use                   |  |

### Sheet B

According to the CDC, antibiotic resistance is among the greatest public health threats today.

- Leading to an estimated 12 million infections and 23,000 deaths per year in the US.

The most important modifiable risk factor for antibiotic resistance is inappropriate prescribing of antibiotics.

- Approximately half of outpatient prescribing in humans might be inappropriate including:
  - Antibiotic selection
  - Dosing or duration
  - Unnecessary antibiotic prescribing
- Estimates are that at least 30% of outpatient antibiotic prescriptions in the US are unnecessary.

Antibiotic stewardship is the effort

- To measure antibiotic prescribing
- To improve antibiotic prescribing by clinicians and use by patients so that antibiotics are only prescribed and used when needed
- To minimize misdiagnoses or delayed diagnoses leading to underuse of antibiotics
- To ensure that the right drug, dose, and duration are selected when an antibiotic is needed

### Sheet C

| Potential tools available to use antibiotics more effectively  | Currently have access to this | If you have access, are you currently using this tool to support antibiotic stewardship efforts? Why/why not? | If you do not have access, how much of a burden would it be to develop this type of tool for your practice?            |
|----------------------------------------------------------------|-------------------------------|---------------------------------------------------------------------------------------------------------------|------------------------------------------------------------------------------------------------------------------------|
| 1. Timely, Accurate Feedback Reports on Antibiotic Prescribing |                               |                                                                                                               | <input type="checkbox"/> Not a burden<br><input type="checkbox"/> Some burden<br><input type="checkbox"/> Large burden |

|                                                                                                                    |  |  |                                                                                                                        |
|--------------------------------------------------------------------------------------------------------------------|--|--|------------------------------------------------------------------------------------------------------------------------|
| 2. Information on antibiotic adverse effects seen in your patients                                                 |  |  | <input type="checkbox"/> Not a burden<br><input type="checkbox"/> Some burden<br><input type="checkbox"/> Large burden |
| 3. Reports from electronic health records on antibiotic prescribing practices.                                     |  |  | <input type="checkbox"/> Not a burden<br><input type="checkbox"/> Some burden<br><input type="checkbox"/> Large burden |
| 4. Clinical decision support tools for antibiotic prescribing/ diagnosis aids that leads to antibiotic prescribing |  |  | <input type="checkbox"/> Not a burden<br><input type="checkbox"/> Some burden<br><input type="checkbox"/> Large burden |
| 5. Patient triage system                                                                                           |  |  | <input type="checkbox"/> Not a burden<br><input type="checkbox"/> Some burden<br><input type="checkbox"/> Large burden |
| 6. Access to experts in infectious diseases, pharmacy, quality improvement practices                               |  |  | <input type="checkbox"/> Not a burden<br><input type="checkbox"/> Some burden<br><input type="checkbox"/> Large burden |
| 7. Access to physician education/ training materials on antibiotic prescribing                                     |  |  | <input type="checkbox"/> Not a burden<br><input type="checkbox"/> Some burden<br><input type="checkbox"/> Large burden |
| 8. Access to materials for patient education on appropriate use of antibiotics                                     |  |  | <input type="checkbox"/> Not a burden<br><input type="checkbox"/> Some burden<br><input type="checkbox"/> Large burden |

**Sheet D**

| Potential feedback loops on antibiotic use                                                                                                                                                                      | 1<br>Not at all useful | 2 | 3 | 4 | 5<br>Very useful |
|-----------------------------------------------------------------------------------------------------------------------------------------------------------------------------------------------------------------|------------------------|---|---|---|------------------|
| 1. If you received a letter from state department of health or health plan notifying your that you or your practice is a “high prescriber” of antibiotics when compared to other providers in your state/region |                        |   |   |   |                  |
| 2. If private health plans create a stand-alone quality incentive program for antibiotic stewardship                                                                                                            |                        |   |   |   |                  |

|                                                                                                                                                                                                         |  |  |  |  |  |
|---------------------------------------------------------------------------------------------------------------------------------------------------------------------------------------------------------|--|--|--|--|--|
| 3. If private health plans include antibiotic stewardship as a “menu item” for a quality incentive program                                                                                              |  |  |  |  |  |
| 4. If your state publicly recognizes practices/individuals that have demonstrated most appropriate antibiotic prescribing                                                                               |  |  |  |  |  |
| 5. If your state publicly publishes results of quality measures for appropriate antibiotic use for all practice locations                                                                               |  |  |  |  |  |
| 6. If your state department of health publishes aggregate data on the volume of outpatient antibiotic prescribing in your state                                                                         |  |  |  |  |  |
| 7. If your state publicly reports “high prescribing” practices                                                                                                                                          |  |  |  |  |  |
| 8. If you received a report card from state department of health or health plans that measure the rates of antibiotic adverse events for your patients compared to other providers in your state/region |  |  |  |  |  |
| 9. If you received a report card from state department of health or health plans on quality measures for antibiotics when compared to other providers in your state/region                              |  |  |  |  |  |

# BMJ Open

## Primary Care Physicians' Attitudes and Perceptions toward Antibiotic Resistance and Outpatient Antibiotic Stewardship in the United States: A Qualitative Study

|                                 |                                                                                                                                                                                                                                                                                                                                                                                                                                                    |
|---------------------------------|----------------------------------------------------------------------------------------------------------------------------------------------------------------------------------------------------------------------------------------------------------------------------------------------------------------------------------------------------------------------------------------------------------------------------------------------------|
| Journal:                        | <i>BMJ Open</i>                                                                                                                                                                                                                                                                                                                                                                                                                                    |
| Manuscript ID                   | bmjopen-2019-034983.R2                                                                                                                                                                                                                                                                                                                                                                                                                             |
| Article Type:                   | Original research                                                                                                                                                                                                                                                                                                                                                                                                                                  |
| Date Submitted by the Author:   | 01-May-2020                                                                                                                                                                                                                                                                                                                                                                                                                                        |
| Complete List of Authors:       | Zetts, Rachel; PEW Charitable Trusts<br>Stoesz, Andrea; PEW Charitable Trusts<br>Garcia, Andrea; American Medical Association<br>Doctor, Jason; University of Southern California Sol Price School of Public Policy<br>Gerber, Jeffrey S.; Children's Hospital of Philadelphia<br>Linder, Jeffrey; Northwestern University Feinberg School of Medicine, Division of General Internal Medicine and Geriatrics<br>Hyun, David; PEW Charitable Trusts |
| <b>Primary Subject Heading</b>: | Public health                                                                                                                                                                                                                                                                                                                                                                                                                                      |
| Secondary Subject Heading:      | Infectious diseases, Qualitative research, General practice / Family practice                                                                                                                                                                                                                                                                                                                                                                      |
| Keywords:                       | Quality in health care < HEALTH SERVICES ADMINISTRATION & MANAGEMENT, INFECTIOUS DISEASES, PRIMARY CARE, PUBLIC HEALTH, QUALITATIVE RESEARCH                                                                                                                                                                                                                                                                                                       |
|                                 |                                                                                                                                                                                                                                                                                                                                                                                                                                                    |

SCHOLARONE™  
Manuscripts

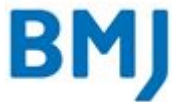

I, the Submitting Author has the right to grant and does grant on behalf of all authors of the Work (as defined in the below author licence), an exclusive licence and/or a non-exclusive licence for contributions from authors who are: i) UK Crown employees; ii) where BMJ has agreed a CC-BY licence shall apply, and/or iii) in accordance with the terms applicable for US Federal Government officers or employees acting as part of their official duties; on a worldwide, perpetual, irrevocable, royalty-free basis to BMJ Publishing Group Ltd ("BMJ") its licensees and where the relevant Journal is co-owned by BMJ to the co-owners of the Journal, to publish the Work in this journal and any other BMJ products and to exploit all rights, as set out in our [licence](#).

The Submitting Author accepts and understands that any supply made under these terms is made by BMJ to the Submitting Author unless you are acting as an employee on behalf of your employer or a postgraduate student of an affiliated institution which is paying any applicable article publishing charge ("APC") for Open Access articles. Where the Submitting Author wishes to make the Work available on an Open Access basis (and intends to pay the relevant APC), the terms of reuse of such Open Access shall be governed by a Creative Commons licence – details of these licences and which [Creative Commons](#) licence will apply to this Work are set out in our licence referred to above.

Other than as permitted in any relevant BMJ Author's Self Archiving Policies, I confirm this Work has not been accepted for publication elsewhere, is not being considered for publication elsewhere and does not duplicate material already published. I confirm all authors consent to publication of this Work and authorise the granting of this licence.

1  
2  
3 **Title:** Primary Care Physicians' Attitudes and Perceptions toward Antibiotic Resistance and  
4 Outpatient Antibiotic Stewardship in the United States: A Qualitative Study  
5

6 **Authors:** Rachel M. Zetts, MPH<sup>1</sup>, Andrea Stoesz, MPH<sup>1</sup>, Andrea M. Garcia, JD, MPH<sup>2</sup>, Jason  
7 N. Doctor, PhD<sup>3</sup>, Jeffrey S. Gerber, MD, PhD<sup>4</sup>, Jeffrey A. Linder, MD, MPH<sup>5</sup>, David Y. Hyun,  
8 MD<sup>1</sup>  
9

10  
11 **Affiliations:** <sup>1</sup>The Pew Charitable Trusts, Washington, DC, USA  
12 <sup>2</sup>American Medical Association, Chicago, USA  
13 <sup>3</sup>Department of Health Policy and Management, Sol Price School of Public  
14 Policy, University of Southern California, Los Angeles, USA  
15 <sup>4</sup>Division of Infectious Diseases, Children's Hospital of Philadelphia,  
16 Philadelphia, USA  
17 <sup>5</sup>Division of General Internal Medicine and Geriatrics, Northwestern University  
18 Feinberg School of Medicine, Chicago, USA  
19  
20

21 **Address correspondence to:** Ms. R.M. Zetts, Officer, Antibiotic Resistance Project, The Pew  
22 Charitable Trusts, 901 E Street, NW, Washington, DC, 20004, USA, 202-540-6557,  
23 [rzetts@pewtrusts.org](mailto:rzetts@pewtrusts.org)  
24  
25

26 **Abstract Word Count:** 298  
27

28 **Article Word Count:** 4,236  
29

30 **Number of Tables:** 4  
31

32  
33 **Keywords:** antibiotic resistance, antibiotics, antimicrobial stewardship, primary care, qualitative  
34 research  
35  
36  
37  
38  
39  
40  
41  
42  
43  
44  
45  
46  
47  
48  
49  
50  
51  
52  
53  
54  
55  
56  
57  
58  
59  
60



**Abstract:**

**Objectives:** At least 30% of outpatient antibiotic prescriptions are unnecessary. Outpatient antibiotic stewardship is needed to improve prescribing and address the threat of antibiotic resistance. A better understanding of primary care physicians' (PCPs) attitudes towards antibiotic prescribing and outpatient antibiotic stewardship is needed to identify barriers to stewardship implementation and help tailor stewardship strategies. The aim of this study was to assess PCPs' current attitudes towards antibiotic resistance, inappropriate antibiotic prescribing, and the feasibility of outpatient stewardship efforts.

**Design:** Eight focus groups with PCPs were conducted by an independent moderator using a moderator guide. Focus groups were audio-recorded, transcribed, and coded for major themes using deductive and inductive content analysis methods.

**Setting:** Focus groups were conducted in 4 U.S. cities: Philadelphia, Birmingham, Chicago, and Los Angeles.

**Participants:** Two focus groups were conducted in each city – one with family medicine and internal medicine physicians and one with pediatricians. A total of 26 family medicine/internal medicine physicians and 26 pediatricians participated.

**Results:** Participants acknowledged that resistance is an important public health issue, but not as important as other pressing problems (e.g., obesity, opioids). Many considered resistance to be more of a hospital issue. While participants recognized inappropriate prescribing as a problem in outpatient settings, many felt that the key drivers were non-primary care settings (e.g., urgent care clinics, retail clinics) and patient demand. Participants reacted positively to stewardship efforts aimed at educating patients and clinicians. They questioned the validity of antibiotic prescribing metrics. This skepticism was due to a number of factors, including the feasibility of

1  
2  
3 capturing prescribing quality, a belief that physicians will “game the system” to improve their  
4  
5 measures, and dissatisfaction and distrust of quality measurement in general.  
6

7 **Conclusions:** Stakeholders will need to consider physician attitudes and beliefs about antibiotic  
8  
9 stewardship when implementing interventions aimed at improving prescribing.  
10  
11

### 12 13 14 **Strengths and limitations of this study**

- 15  
16  
17 ➤ This study presents new data on U.S.-based primary care physicians’ attitudes towards  
18  
19 antibiotic resistance, inappropriate antibiotic prescribing, and outpatient antibiotic  
20  
21 stewardship approaches.  
22
- 23  
24 ➤ Eight focus groups with internal medicine physicians, family medicine physicians, and  
25  
26 pediatricians were held in four geographically-dispersed U.S. cities, which allowed for a  
27  
28 wide-range of viewpoints to be represented in the dataset.  
29
- 30  
31 ➤ The focus groups did not include some types of clinicians that provide primary care in the  
32  
33 U.S. (e.g., nurse practitioners, physician assistants).  
34
- 35  
36 ➤ Although physicians from across the U.S. were included in this study, the small sample  
37  
38 size limits the generalizability of these findings.  
39  
40  
41  
42  
43  
44  
45  
46  
47  
48  
49  
50  
51  
52  
53  
54  
55  
56  
57  
58  
59  
60

## Introduction

Antibiotic resistance poses a growing threat to public health and antibiotic use is a primary driver of the development of resistant bacteria. In the United States, the majority of antibiotics used in humans are prescribed in outpatient healthcare settings.[1] Considering the volume of antibiotics prescribed and data from other countries, ambulatory antibiotic prescribing likely accounts for 80-90% of all antibiotic prescribing.[2,3]

There were 270.2 million outpatient antibiotic prescriptions dispensed in 2016.[4] While this represents a 5% decrease since 2011, prescribing rates have been relatively stable from 2014-2016.[4] Previous studies have found that a significant proportion of outpatient antibiotic prescriptions are inappropriate.[5-9] Many of these inappropriate prescriptions were for acute respiratory conditions that often do not require antibiotics.[5,7,8]

In order to improve antibiotic prescribing in primary care offices and other outpatient healthcare settings, the Centers for Disease Control and Prevention (CDC) published core elements of outpatient antibiotic stewardship, highlighting steps that stakeholders can take in support of stewardship efforts.[10] However, additional work is needed to ensure outpatient stewardship efforts are expanded nationwide. A better understanding of physicians' attitudes towards antibiotic prescribing and their perceptions on the feasibility and impact of stewardship interventions would identify barriers to stewardship implementation in U.S. ambulatory settings and would allow stakeholders to better tailor strategies to improve prescribing.

1  
2  
3 Previous research has evaluated what drives inappropriate antibiotic prescribing in healthcare  
4 settings. These studies, although evaluating physician populations in differing countries, have  
5 found some consistent themes. Many studies, including those from the U.S and Europe, have  
6 shown that physicians consider patient demand and prescribing of other physicians to be primary  
7 drivers of inappropriate antibiotic prescribing.[11-25] In order to counteract these drivers of  
8 inappropriate prescribing, physicians have highlighted a need for improved public education  
9 around antibiotic resistance and the need for appropriate prescribing.[20-23,26] Additionally,  
10 studies from U.S. and European countries have shown that physician time constraints, fear of  
11 undertreating patients due to diagnostic uncertainty, and certain clinical factors are also seen as  
12 drivers of inappropriate prescribing.[11-13,15-17,19-21,23,24,27,28]  
13  
14  
15  
16  
17  
18  
19  
20  
21  
22  
23  
24  
25  
26  
27

28 Studies have also found that physicians do not necessarily see the impact of antibiotic resistance  
29 in their daily practice. Two interview-based studies of primary care clinicians in the UK and  
30 Europe showed a general recognition that antibiotic resistance is an important issue, but many  
31 were less concerned about resistance in their daily practice.[29,30] A systematic review of  
32 studies from different countries found a similar dynamic.[26] However, a U.S.-based qualitative  
33 study did find that, while physicians did not commonly mention antibiotic resistance as a factor  
34 when making prescribing decisions, some did express concerns about the availability of  
35 antibiotics in the future.[11]  
36  
37  
38  
39  
40  
41  
42  
43  
44  
45  
46  
47  
48

49 Expanding upon this research to gain a better understanding of current attitudes about antibiotic  
50 prescribing and the perceived impact of different antibiotic stewardship approaches among U.S.  
51 outpatient physicians is needed. This is especially true for primary care physicians (PCPs) given  
52  
53  
54  
55  
56  
57  
58  
59  
60

1  
2  
3 that they account for the largest proportion of outpatient antibiotic prescriptions (38%) in the  
4  
5 United States.[31]  
6  
7  
8  
9

10 In the United States, primary care services are often provided by family medicine physicians,  
11  
12 internists, and pediatricians.[32] The provision of these services can be fragmented. Many  
13  
14 patients do not receive extended primary care services and after-hours care from their usual  
15  
16 primary care offices.[33] Additionally, PCPs in the U.S. receive payment for their services from  
17  
18 a range of commercial and public payers,[32] all of which frequently measure the quality of care  
19  
20 to determine reimbursement levels. All of these factors have the potential to influence U.S.  
21  
22 PCPs' views on antibiotic prescribing and approaches to improving antibiotic use in outpatient  
23  
24 settings.  
25  
26  
27  
28  
29  
30

31 In order to assess these attitudes and perceptions and inform strategies for antibiotic stewardship  
32  
33 tailored to U.S. outpatient settings, we conducted a series of semi-structured focus groups among  
34  
35 PCPs in the United States.  
36  
37  
38  
39

## 40 **Methods**

### 41 *Study Design*

42  
43  
44  
45 We conducted eight focus groups in November and December of 2017 with PCPs in four U.S.  
46  
47 cities – Philadelphia, PA; Birmingham, AL; Chicago, IL; and Los Angeles, CA. Focus groups  
48  
49 were chosen for this study to allow for open discussion amongst participants and to allow for  
50  
51  
52  
53  
54  
55  
56  
57  
58  
59  
60

1  
2  
3 different opinions and debate. This allows both for the identification of areas where there is  
4  
5 dissension and broad consensus during the analysis process, and adds further complexity to the  
6  
7 themes.  
8  
9

10  
11  
12 The four cities were selected to represent each of the four U.S. Census regions in order to  
13  
14 account for any potential differences in attitudes based on geographic region. Research has  
15  
16 shown a clear difference in overall outpatient antibiotic prescribing rates by geographic region in  
17  
18 the U.S., with individuals in Southern states prescribed antibiotics at higher rates than those in  
19  
20 any other part of the country.[4,31] For example, in 2017 the antibiotic prescribing rate in West  
21  
22 Virginia (the state with the highest rate) was more than double that of Alaska (the state with the  
23  
24 lowest rate).[31] Additionally, many primary care physicians in the U.S. specialize in family  
25  
26 medicine, internal medicine, or pediatrics.[32] As such, two focus groups were conducted in  
27  
28 each city – one with family medicine and internal medicine physicians and one with  
29  
30 pediatricians.  
31  
32  
33  
34  
35  
36  
37

38 A screening questionnaire was developed to recruit participants. Inclusion criteria included self-  
39  
40 report of board certification in pediatrics, family medicine, or internal medicine; being a full-  
41  
42 time physician primarily practicing in an outpatient office setting; spending  $\geq 50\%$  of medical  
43  
44 practice time in direct patient care; and fluency in English. Participants were excluded if they  
45  
46 reported being  $> 65$  years-old; board-certified in a subspecialty outside of primary care; or an  
47  
48 employee or paid consultant of any of the following organizations: a pharmaceutical, medical  
49  
50 device, or biotechnology company, an advertising or healthcare marketing company, or a  
51  
52 governmental or regulatory agency.  
53  
54  
55  
56  
57  
58  
59  
60

1  
2  
3  
4  
5 Study participants were recruited by M3 Global Research, a medical market research firm.  
6  
7 Participants were initially recruited from a panel of healthcare professionals maintained by M3.  
8  
9 For three cities – Chicago, Birmingham, and Los Angeles – additional participants were  
10  
11 recruited from physician panels maintained by local partners to ensure adequate participation.  
12  
13 Individuals located within a 30-mile radius of each focus group facility were contacted by  
14  
15 telephone or online and screened for participation in this study. Any participant recruited online  
16  
17 received a follow-up call from M3 to confirm their eligibility.  
18  
19  
20  
21  
22  
23

24 Each focus group lasted between 1.5 and 2 hours and was moderated by the same independent  
25  
26 moderator with experience in qualitative research. Prior to each focus group, participants  
27  
28 received an informed consent form to review and sign. All participants signed the informed  
29  
30 consent form. Each participant received \$400 to compensate for their time.  
31  
32  
33  
34

35 The study protocol was reviewed for ethical considerations and deemed exempt by the  
36  
37 Chesapeake IRB (now known as Advarra). The Standards for Reporting Qualitative Research  
38  
39 reporting guidelines were used in the reporting of study findings (see supplementary file #1).[34]  
40  
41  
42  
43

#### 44 *Data Collection and Analysis*

45  
46  
47  
48

49 The study team and the external moderator developed a semi-structured moderator guide (see  
50  
51 supplementary file #2). This guide aimed to draw out issues identified based on previous  
52  
53 research – such as perceptions of antibiotic resistance and drivers of inappropriate prescribing,  
54  
55  
56  
57  
58  
59  
60

1  
2  
3 including patient demand – as well as explore new areas, such as the perceived impact of  
4 different stewardship strategies. The guide began by asking participants to rank a number of  
5 public health issues in terms of importance in their daily practice. These issues included excess  
6 body weight and obesity, antibiotic resistance, misinformation about childhood vaccines  
7 (pediatricians only), opioid abuse, diabetes, patient non-compliance with drug regimens, and  
8 smoking/tobacco use.  
9

10  
11  
12 The guide then asked questions aimed at understanding the physicians' attitudes and perceptions  
13 around antibiotic use and stewardship, including factors that influence their antibiotic prescribing  
14 decisions and if/how they communicate with patients about these decisions. They were also  
15 given handouts that defined and provided examples of the CDC's Core Elements of Outpatient  
16 Antibiotic Stewardship.[10] These handouts were used to gauge perceptions on the feasibility  
17 and impact of the core elements and associated activities.  
18  
19

20  
21  
22 Finally, participants were asked for feedback on activities that encourage antibiotic stewardship  
23 implementation and resource availability to do so. Respondents provided opinions on the  
24 feasibility and effectiveness of example policies and activities that could be implemented by  
25 healthcare stakeholders to encourage stewardship implementation. To assess resource  
26 availability, participants were asked to provide feedback on current access to certain tools to  
27 support antibiotic stewardship efforts, such as feedback reports on antibiotic prescribing  
28 practices or access to patient education materials and, if not, how much of a burden it would be  
29 to obtain access.  
30  
31  
32  
33  
34  
35  
36  
37  
38  
39  
40  
41  
42  
43  
44  
45  
46  
47  
48  
49  
50  
51  
52  
53  
54  
55  
56  
57  
58  
59  
60



1  
2  
3 All focus groups were audio and video-recorded, transcribed (using the audio recording), and the  
4 transcripts were coded for major themes in NVivo 11 (QSR International). Common themes  
5 were identified by three study authors (RZ, AS, DH), using both deductive and inductive content  
6 analysis methods.[35,36] We applied the following steps for analyzing the transcripts. First,  
7 reesearchers (RZ, DH) familiarized themselves with the data by observing all eight focus groups.  
8 Next, an initial list of themes was developed based on (1) a review of past studies on the topic of  
9 antibiotic resistance and stewardship in outpatient settings [11-18,37,38] and (2) the data  
10 familiarization process. These themes were independently applied to the transcripts and coded by  
11 two authors (RZ, AS) and reviewed by another author (DH). During this process, new themes  
12 were identified through further review of the transcripts and some of the initial themes were  
13 modified. Any disagreement in coding was discussed until consensus was met. Coding was  
14 considered complete once theoretical saturation was reached and no additional themes could be  
15 identified.[36]

### 35 *Patient and Public Involvement*

36 This research was done without patient involvement. Patients were not invited to comment on  
37 the study design and were not consulted to develop patient relevant outcomes or interpret the  
38 results. Patients were not invited to contribute to the writing or editing of this document for  
39 readability or accuracy.

## 49 **Results**

1  
2  
3 A total of 52 PCPs – 26 family medicine and internal medicine physicians and 26 pediatricians –  
4  
5 accepted the invitation and participated in the focus groups. No demographic information was  
6  
7 collected for these participants.  
8  
9

10  
11  
12 A number of common themes were identified across these focus groups that illustrated attitudes  
13  
14 on the following topics: (1) antibiotic resistance as a public health issue, (2) drivers of antibiotic  
15  
16 prescribing, (3) the acceptability of antibiotic stewardship interventions – patient and physician  
17  
18 education, and (4) acceptability of performance reporting. Themes within each of these areas are  
19  
20 highlighted below, along with areas of disagreement among participants where appropriate.  
21  
22  
23

### 24 25 26 *Antibiotic Resistance as a Public Health Issue*

27

28  
29  
30  
31 The initial discussions within each focus group centered on what participants thought about  
32  
33 antibiotic resistance as a public health issue. Two themes were seen across focus groups –  
34  
35 antibiotic resistance was seen as less of a priority than other public health issues faced by  
36  
37 participants and antibiotic resistance was considered an issue for their patient population (Table  
38  
39 1).  
40  
41  
42  
43

### 44 45 *Antibiotic resistance seen as less important than other public health issues*

46

47 A common theme among focus group participants was the perception of antibiotic resistance  
48  
49 being less important in their daily practice when compared with other public health issues they  
50  
51 commonly faced, such as obesity, diabetes, and opioid misuse.  
52  
53  
54  
55  
56  
57  
58  
59  
60

1  
2  
3 *Antibiotic resistance is an issue, but not for my patient population*  
4

5 While many participants acknowledged that antibiotic resistance is a concern, many did not see it  
6 as an issue that impacted their patients or their daily practice. Instead, most participants  
7 considered antibiotic resistance as something affecting sicker, hospitalized patients. In contrast,  
8 some participants acknowledged that they have seen an increase in resistant infections in their  
9 patients with urinary tract infections or skin infections. However, these participants still classified  
10 resistance as an issue largely impacting inpatient medicine.  
11  
12  
13  
14  
15  
16  
17  
18  
19  
20

21 ***Drivers of Antibiotic Prescribing***  
22  
23  
24  
25

26 Participants in all focus groups also discussed what they thought was driving outpatient  
27 antibiotic prescribing. Two themes emerged: (1) participants argued that other physicians were  
28 the ones driving inappropriate prescribing, and, (2) patient demand for antibiotics continues to  
29 be an issue in primary care (Table 2).  
30  
31  
32  
33  
34  
35  
36  
37

38 *Attribution of inappropriate antibiotic prescribing to others*  
39

40 Participants indicated that they believed inappropriate outpatient antibiotic prescribing is largely  
41 driven by clinicians other than themselves, namely those practicing in urgent care offices and  
42 retail clinics. This contributed to the feeling that resisting patient demand for antibiotics is futile,  
43 as patients can simply see another clinician and get what they want. Participants also said that  
44 patients' past experiences of receiving antibiotics from another clinician reinforced patient  
45 expectations for antibiotics for the same complaint. This, in their mind, strengthens patient  
46 resolve to demand antibiotics.  
47  
48  
49  
50  
51  
52  
53  
54  
55  
56  
57  
58  
59  
60

1  
2  
3  
4  
5 *Patient demand as a driving factor*  
6

7  
8 When discussing drivers of antibiotic prescribing habits, a common theme was the pressure  
9  
10 participants said they experience from patients who the prescribers perceive to expect antibiotics  
11  
12 even when not medically indicated. Participants often returned to this theme throughout the focus  
13  
14 group discussions. Participants contended that patients often feel entitled to leave a visit with a  
15  
16 material treatment – often an antibiotic - after spending time and money at a doctor’s office.  
17  
18 Participants argued that patient pressure is compounded by the use of patient satisfaction scores  
19  
20 when grading physician performance. They expressed concern that, if they refused to prescribe  
21  
22 an antibiotic for a patient who expected one, that the patient might write a negative review and/or  
23  
24 score the physician poorly.  
25  
26  
27  
28  
29

30  
31 However, it is important to note that some participants indicated that the impact of patient  
32  
33 expectations for antibiotics on their prescribing decisions can vary. For example, some  
34  
35 participants indicated that they may be more willing to push back against prescribing an  
36  
37 antibiotic if they have a long-standing relationship with a patient. This was more common among  
38  
39 pediatricians as many of them indicated they have many opportunities to interact with patients  
40  
41 and their parents during well child visits, making it easier for them to discuss why an antibiotic is  
42  
43 or is not needed with parents.  
44  
45  
46  
47  
48

49 ***Acceptability of Antibiotic Stewardship Interventions – Patient and Physician Education***  
50  
51  
52  
53  
54  
55  
56  
57  
58  
59  
60

1  
2  
3 On the topic of antibiotic stewardship efforts focused on patient and physician education,  
4 participants primarily indicated support for these activities (Table 3).  
5  
6  
7  
8  
9

### 10 *Need for patient education*

11  
12 Consistent with the perception of patient demand for antibiotics generating concern, participants  
13 emphasized that, in order for them to be able to effectively do their jobs, their patients need to be  
14 educated about when antibiotics are and are not appropriate and why judicious antibiotic use is  
15 critical to combating antibiotic resistance. Participants suggested several approaches for  
16 educating the public, including written education materials in different languages, educational  
17 videos for waiting rooms, and direct-to-consumer advertisements. Finally, many physicians  
18 emphasized the need to provide education in advance of a patient visit. By the time a patient is at  
19 a doctor's office for an illness, many felt it was too late to change patient expectations.  
20  
21  
22  
23  
24  
25  
26  
27  
28  
29  
30  
31  
32

### 33 *Acceptability of physician education*

34  
35 Many participants indicated that physician education would also be a welcome approach for  
36 outpatient antibiotic stewardship. Participants described educational efforts as more helpful for  
37 physicians compared to other interventions, such as providing feedback on prescribing practices,  
38 which was viewed as more critical of physicians. For example, participants indicated that  
39 training in how to communicate antibiotic prescribing decisions to patients would be helpful.  
40  
41  
42  
43  
44  
45  
46  
47 One area of disagreement emerged around whether this education should be mandatory or  
48 voluntary. A few participants mentioned that requiring outpatient physicians to complete  
49 continuing medical education (CME) on antibiotic use – similar to requirements for CME around  
50  
51  
52  
53  
54  
55  
56  
57  
58  
59  
60

1  
2  
3 opioid prescribing – may be helpful. However, other participants indicated that they would prefer  
4  
5 voluntary rather than mandatory CME.  
6  
7  
8  
9

### 10 *Acceptability of Performance Reporting*

11  
12  
13

14  
15 When presented with examples of stewardship efforts aimed at measuring and providing  
16  
17 feedback on antibiotic prescribing practices, physicians were less supportive compared to  
18  
19 educational efforts. A number of themes emerged in this area – both themes specific to antibiotic  
20  
21 prescribing measurement, as well as themes regarding quality measurement efforts more broadly  
22  
23 (Table 4).  
24  
25  
26  
27

### 28 *Feasibility of measuring antibiotic prescribing*

29  
30

31 Participants expressed concerns about antibiotic stewardship activities focused on measuring  
32  
33 inappropriate antibiotic use, questioning the feasibility of assessing prescribing quality while  
34  
35 accounting for different patient populations. Some participants indicated that developing  
36  
37 antibiotic use reports would likely require significant financial and time investments. Many  
38  
39 participants argued that antibiotic use measures are unlikely to capture all of the clinical elements  
40  
41 from an office visit to provide the full context behind an antibiotic prescription, and that setting  
42  
43 standards for the quality of antibiotic use would be difficult. Some questioned who would be  
44  
45 qualified to set these standards and how that might impact the accuracy and fairness of antibiotic  
46  
47 use measures.  
48  
49  
50  
51  
52

### 53 *Belief that physicians will “game the system”*

54  
55  
56  
57  
58  
59  
60

1  
2  
3 Participants also argued that, if antibiotic use measures were developed and implemented, other  
4 physicians would simply use the rules put in place to manipulate the desired outcome (i.e.,  
5 “game the system”) to improve their antibiotic prescribing scores. Some participants indicated  
6 that physicians could easily identify what diagnosis codes they were being measured on and shift  
7 coding practices to more antibiotic-appropriate conditions.  
8  
9  
10  
11  
12  
13  
14  
15  
16

### 17 *Dissatisfaction with the quality measurement system*

18  
19 Many participants also expressed dissatisfaction and general distrust of quality measurement  
20 systems and reporting processes. Participants expressed a sense of feeling over-measured and  
21 being blamed for things beyond their control. Participants argued that quality measures assume  
22 that medicine is black and white and do not account for their need to use clinical judgment when  
23 treating patients. Some expressed concern that any new measure could eventually be turned  
24 around and used against them. Examples mentioned in different focus groups included using  
25 quality measures as a way to reimburse physicians at a lower level or a reason to fire a physician.  
26  
27  
28  
29  
30  
31  
32  
33  
34  
35  
36  
37

### 38 *Distrust of tracking and reporting systems*

39  
40 Finally, participants described issues that they have experienced with the inaccuracy of tracking  
41 and reporting systems. For example, participants indicated that they often receive feedback  
42 reports that include patients that they have not seen in years, or feedback reports with clear  
43 coding errors. These inaccuracies lead them to generally dismiss the utility of these reports.  
44  
45  
46  
47  
48  
49  
50

## 51 **Discussion**

1  
2  
3 We conducted focus groups with PCPs to assess their knowledge and attitudes towards antibiotic  
4 resistance, inappropriate antibiotic prescribing, and outpatient antibiotic stewardship approaches.  
5  
6 While participants recognized the public health importance of antibiotic resistance and antibiotic  
7 use, they felt these issues were less important compared to other public health priorities in  
8 outpatient care. This finding echoes past research,[26,29,30] and adds further insight by placing  
9 antibiotic resistance within the broader context of public health issues encountered in primary  
10 care. Our participants consistently identified antibiotic resistance as a lower priority for their  
11 practice compared to other health concerns. This is consistent with what has been shown in  
12 hospital-based studies, with one Swedish study identifying a lack of recognition of antibiotic  
13 resistance as an imminent threat as a barrier to stewardship.[39]  
14  
15  
16  
17  
18  
19  
20  
21  
22  
23  
24  
25  
26  
27

28 Additionally, most study participants felt they were already good antibiotic stewards, but that  
29 their efforts were hindered by patient demand for antibiotics and the prescribing practices of  
30 other physicians. These findings are consistent with previous research on perceptions of drivers  
31 of outpatient antibiotic prescribing.[11-25] In particular, the perception of patient demand as a  
32 driving force behind inappropriate prescribing practices continues to be a consistent finding  
33 across studies both in the U.S. and other countries. Similar perceptions have also been  
34 documented among inpatient physicians who believe that prescribers outside of hospitals are  
35 primarily responsible for antibiotic overuse and antibiotic resistance, underscoring the value for  
36 individual feedback on prescribing patterns to help these physicians recognize the need for  
37 antibiotic stewardship in their practice.[40] This indicates a continued need for stewardship  
38 efforts to address these concerns moving forward.  
39  
40  
41  
42  
43  
44  
45  
46  
47  
48  
49  
50  
51  
52  
53  
54  
55  
56  
57  
58  
59  
60



1  
2  
3 Along those lines, participants in our study reacted positively to education-focused stewardship  
4 activities – particularly those activities aimed at educating the general public. Participants were  
5 also supportive of education targeting physicians, such as trainings on how to best communicate  
6 antibiotic prescribing decisions with patients. Previous studies from both Europe and the U.S.  
7 have shown physicians are receptive to educational efforts – ranging from national media  
8 campaigns to educating children in schools about antibiotics.[15,16,21,26] Additionally findings  
9 from inpatient studies also suggest treatment guidelines can be an impactful educational tool for  
10 changing prescribing behaviors.[41,42]  
11  
12  
13  
14  
15  
16  
17  
18  
19  
20  
21  
22  
23

24 In contrast to educational efforts, our study participants remained unconvinced about the utility  
25 of antibiotic use tracking and reporting as a stewardship strategy. Participants' negative attitudes  
26 regarding the feasibility of measuring the quality of antibiotic use in an accurate or fair manner,  
27 and their distrust of the quality measurement system in the U.S. in general factored into  
28 participants' perceptions on the impact of antibiotic use measurement. A previous U.S. study  
29 evaluating pediatrician perceptions of an intervention that included audit and feedback of  
30 antibiotic prescribing practices found high skepticism among physicians about the quality and  
31 accuracy of the feedback reports.[12] However, while physicians remain hesitant about the  
32 approach of tracking and reporting antibiotic use, studies from the U.S. and U.K. have shown  
33 that this stewardship approach is effective at reducing inappropriate prescribing.[43-47]  
34  
35  
36  
37  
38  
39  
40  
41  
42  
43  
44  
45  
46  
47  
48

49 Additional studies have evaluated physician perceptions of broader quality measurement  
50 systems. One study of U.S. physicians in three states found that 71% felt that pediatric quality  
51 reports were effective at improving pediatric care.[48] However, in interviews with providers in  
52  
53  
54  
55  
56  
57  
58  
59  
60

1  
2  
3 two of these states, authors found that physicians were frustrated with certain aspects of the  
4 quality reports, such as the inclusion of measures that they felt were outside of their control.[48]  
5  
6 A 2009 survey of U.S. physicians on perceptions of Medicare's Physician Quality Reporting  
7 Initiative (PQRI) found that 50% of physicians participating in PQRI programs believed it had  
8 no impact on quality of care.[49] By comparison, qualitative studies in the U.K. have shown that  
9 the national pay-for-performance program has been mostly well received by the general  
10 practitioners.[50,51] However, some concerns remain over reduced clinical autonomy,  
11 perceptions of micromanagement, and skepticism of the validity of certain quality indicators.  
12 While these studies demonstrate that negative perceptions remain around financial incentive  
13 mechanisms, another study did find that how antibiotic use incentives are framed could be  
14 impactful – specifically framing these efforts as addressing harms to patients.[52]  
15  
16  
17  
18  
19  
20  
21  
22  
23  
24  
25  
26  
27  
28  
29  
30

31 Many of our findings are consistent with research on self-enhancement bias—that people take  
32 full credit for their success but are quick to dismiss failures as caused by external factors.[53,54]  
33 Self-enhancement is adaptive because it protects against being discouraged or down on one's  
34 self, preserves a person's self-image, and keeps them motivated to work and thrive in their life.  
35 This may explain findings from our focus groups, including: (1) the physicians' belief that  
36 patients' antibiotic knowledge deficits and other clinicians' behaviors were key drivers of  
37 overprescribing, and (2) their defensive responses when confronted with the potential for reports  
38 of their own prescribing by questioning the validity of the measurement enterprise. These  
39 perceptions present a challenge when addressing inappropriate antibiotic prescribing. Some  
40 approaches that have been successful in reducing antibiotic overprescribing invert the problem of  
41 self-enhancement by using it as a way to encourage or reward appropriate prescribing. These  
42  
43  
44  
45  
46  
47  
48  
49  
50  
51  
52  
53  
54  
55  
56  
57  
58  
59  
60

1  
2  
3 interventions engender reputational concerns when antibiotics are used or make explicit social  
4 comparisons of performance with others to encourage pursuit of a positive self-image (e.g., the  
5 prospect of becoming a “top performer”) through lower prescribing.[55,56]  
6  
7  
8  
9

10  
11  
12 This study provides important insight into current attitudes of primary care physicians in the  
13 United States on issues related to antibiotic resistance, inappropriate antibiotic prescribing, and  
14 antibiotic stewardship implementation. Enhanced understanding of perceptions amongst these  
15 providers is critical as healthcare stakeholders work to expand stewardship activities into primary  
16 care settings. Two of the four core elements for outpatient antibiotic stewardship are tracking and  
17 reporting antibiotic prescribing practices, and the provision of education and access to expertise  
18 on antibiotic prescribing.[10] While our study shows support from PCPs for educational  
19 initiatives, more work will be needed to address PCP concerns related to tracking and reporting  
20 antibiotic use. Healthcare stakeholders will need to work to build trust among the PCP  
21 community around antibiotic prescribing feedback, and will need to identify ways to make the  
22 feedback provided to physicians actionable to help ensure impact.  
23  
24  
25  
26  
27  
28  
29  
30  
31  
32  
33  
34  
35  
36  
37  
38  
39

40 Another important barrier to expanded stewardship implementation identified by this study is a  
41 continued lack of prioritization of this issue amongst PCPs. Healthcare stakeholders – including  
42 public health authorities, health plans, and health systems – will need to identify ways to  
43 incentivize stewardship uptake in primary care practices in the U.S.  
44  
45  
46  
47  
48  
49  
50

51 By conducting focus groups in cities across the U.S. and with internists, family medicine  
52 physicians, and pediatricians, we were able to gather data from a wide-range of perspectives. The  
53  
54  
55  
56  
57

1  
2  
3 consistent themes identified throughout the focus groups suggest that barriers to stewardship  
4 implementation may be similar across the United States.  
5  
6  
7  
8  
9

10 This study also has limitations. Because this is a qualitative study with a small sample size, these  
11 findings cannot be generalized to the broader U.S. PCP population or to general practitioners in  
12 other countries. Participants were drawn from physician databases maintained for research  
13 purposes. Physicians who were recruited and who participated in these focus groups may have  
14 different or stronger opinions than those who did not. Additionally, as we recruited physicians  
15 from cities in each of the four U.S. Census regions, it is possible that views and perceptions of  
16 PCPs from rural practices were underrepresented in this study. Finally, this study evaluated  
17 physicians who specialized in family medicine, internal medicine, or pediatrics. We did not  
18 include other primary care clinicians, such as nurse practitioners or physician assistants.  
19 Additional research will be needed to assess whether these findings are applicable to the broader  
20 primary care clinician community.  
21  
22  
23  
24  
25  
26  
27  
28  
29  
30  
31  
32  
33  
34  
35  
36  
37

38 In conclusion, the findings from these focus groups show that more work is needed to elevate the  
39 issue of antibiotic resistance and the need for improved prescribing among PCPs in the U.S.  
40 Additionally, current skepticism among PCPs about the feasibility and accuracy of antibiotic use  
41 measurement may create concern around interventions that rely solely on tracking and reporting  
42 prescribing. It will be important to address these perceptions when designing interventions aimed  
43 at decreasing inappropriate antibiotic prescribing in outpatient settings.  
44  
45  
46  
47  
48  
49  
50  
51

52 **Funding Statement:** This research received no specific grant from any funding agency in the  
53 public, commercial, or not-for-profit sectors.  
54  
55  
56  
57  
58  
59  
60

### Conflict of Interest

Dr. Linder, Dr. Gerber, and Dr. Doctor all received honoraria for time dedicated to this research project. Dr. Doctor has received consultant fees from Precision Health Economics and University of Pennsylvania Health System. Dr. Doctor was supported by grants from the National Institutes of on Aging (R21AG057395, R21AG057400, R21AG057396, R21AG057383, P30AG024968, R33AG057395), the National Institute on Drug Abuse (R01 DA046226), the National Institute of Arthrist and Musculoskeletal Conditions (R01 AR073486), the Agency for Healthcare Research and Quality (R01 HS026506) and the Patient-Centered Outcome Research Institute (CDRN-1306-04864). Dr. Linder was supported by grants from the National Institute on Aging (R21AG057400, R21AG057396, R21AG057383, R21AG057395), Agency for Healthcare Research and Quality (R01HS024930, R01HS026506), The Peterson Center on Healthcare, and a contract from the Agency for Healthcare Research and Quality (HHSP2332015000201).

### Contributors' Statement

Ms. Zetts led the development of the study concept and design, participated in the analysis and interpretation of data, and drafted the manuscript.

Ms. Stoesz participated in the analysis and interpretation of data and provided critical revision of the manuscript.

Ms. Garcia provided input in the development of the study concept and design, participated in the interpretation of data, and provided critical revision of the manuscript.

Dr. Doctor provided input in the development of the study concept and design, participated in the interpretation of data, and provided critical revision of the manuscript.

Dr. Gerber provided input in the development of the study concept and design, participated in the interpretation of data, and provided critical revision of the manuscript.

Dr. Linder provided input in the development of the study concept and design, participated in the interpretation of data, and provided critical revision of the manuscript.

Dr. Hyun provided supervision in the development of the study concept and design, participated in the analysis and interpretation of data, and provided critical revision of the manuscript.

**Data sharing statement:** No additional data beyond what is presented in the manuscript is available.

## References

1. Suda KJ, Hicks LA, Roberts RM, Hunkler RJ, Matusiak LM, Schumock GT. Antibiotic Expenditures by Medication, Class, and Health Care Setting in the United States, 2010-2015. *Clin Infect Dis* 2018;66(2):185-190. doi:10.1093/cid/cix773.
2. Public Health England. English Surveillance Programme for Antimicrobial Utilisation and Resistance (ESPAUR): report 2014. [https://www.gov.uk/government/uploads/system/uploads/attachment\\_data/file/362374/ESPAUR\\_Report\\_2014\\_3.pdf](https://www.gov.uk/government/uploads/system/uploads/attachment_data/file/362374/ESPAUR_Report_2014_3.pdf) (accessed 18 April 2019).
3. Public Health Agency of Sweden, National Veterinary Institute. Consumption of antibiotics and occurrence of antibiotic resistance in Sweden. Swedres-Svarm 2014. Report No.: ISSN 1650-6332. <https://www.folkhalsomyndigheten.se/pagefiles/20281/Swedres-Svarm-2014-14027.pdf> (accessed 18 April 2019).
4. King LM, Bartoces M, Fleming-Dutra KE, Roberts RM, Hicks LA. Changes in US Outpatient Antibiotic Prescriptions from 2011-2016. *Clin Infect Dis* 2019. doi:10.1093/cid/ciz225.
5. Fleming-Dutra KE, Hersh AL, Shapiro DJ, et al. Prevalence of inappropriate antibiotic prescriptions among US ambulatory care visits, 2010-2011. *JAMA* 2016;315(17):1864-1873. doi:10.1001/jama.2016.4151.
6. Hersh AL, Fleming-Dutra KE, Shapiro DJ, Hyun DY, Hicks LA. Frequency of First-line Antibiotic Selection Among US Ambulatory Care Visits for Otitis Media, Sinusitis, and Pharyngitis. *JAMA Intern Med* 2016;176(12):1870-1872. doi:10.1001/jamainternmed.2016.6625.
7. Chua KP, Fischer MA, Linder JA. Appropriateness of outpatient antibiotic prescribing among privately insured US patients: ICD-10-CM based cross sectional study. *BMJ* 2019;364:k5092. doi:10.1136/bmj.k5092.
8. Palms DL, Hicks LA, Bartoces M, et al. Comparison of Antibiotic Prescribing in Retail Clinics, Urgent Care Centers, Emergency Departments, and Traditional Ambulatory Care Settings in the United States. *JAMA Intern Med* 2018;178(9):1267-1269. doi:10.1001/jamainternmed.2018.1632
9. Fischer MA, Mahersi M, Lii J, Linder JA. Invisible threats to improving antibiotic use: non-infection-related and non-visit-based antibiotic prescribing for Medicaid patients. *Health Aff* 2019;in press.
10. Centers for Disease Control and Prevention. The Core Elements of Outpatient Antibiotic Stewardship. <https://www.cdc.gov/antibiotic-use/community/improving-prescribing/core-elements/core-outpatient-stewardship.html>. Published 2016 (accessed 11 November 2018).
11. Sanchez GV, Roberts RM, Albert AP, Johnson DD, Hicks LA. Effects of knowledge, attitudes, and practices of primary care providers on antibiotic selection, United States. *Emerg Infect Dis* 2014;20(12):2041-2047. doi:10.3201/eid2012.140331.
12. Szymczak JE, Feemster KA, Zaoutis TE, Gerber JS. Pediatrician perceptions of an outpatient antimicrobial stewardship intervention. *Infect Control Hosp Epidemiol* 2014;35(suppl 3):S69-S78. doi:10.1086/677826.
13. Petursson P. GPs' reasons for "non-pharmacological" prescribing of antibiotics. A phenomenological study. *Scand J Prim Health Care* 2005;23(2):120-125. doi:10.1080/02813430510018491.

14. Evans CT, Rogers TJ, Weaver FM, Burns SP. Providers' beliefs and behaviors regarding antibiotic prescribing and antibiotic resistance in persons with spinal cord injury or disorder. *J Spinal Cord Med* 2011;34(1):16-21. doi:10.1179/107902610X12886261091794.
15. Dempsey PP, Businger AC, Whaley LE, Gagne JJ, Linder JA. Primary care clinicians' perceptions about antibiotic prescribing for acute bronchitis: a qualitative study. *BMC Fam Pract* 2014;15:194. doi: 10.1186/s12875-014-0194-5.
16. Butler CC, Rollnick S, Pill R, Maggs-Rapport F, Scott N. Understanding the culture of prescribing: qualitative study of general practitioners' and patients' perceptions of antibiotics for sore throats. *BMJ* 1998;317(7159):637-642. doi: 10.1136/bmj.317.7159.637.
17. May L, Gudger G, Armstrong P, et al. Multisite exploration of clinical decision making for antibiotic use by emergency medicine providers using quantitative and qualitative methods. *Infect Control Hosp Epidemiol* 2014;35(9):1114-1125. doi:10.1086/677637.
18. Bauchner H, Pelton SI, Klein JO. Parents, physicians, and antibiotic use. *Pediatrics* 1999;103(2):395-401.
19. Yates TD, David ME, Taylor YJ, et al. Not a magic pill: a qualitative exploration of provider perspectives on antibiotic prescribing in the outpatient setting. *BMC Fam Pract* 2018;19(1):96. doi: 10.1186/s12875-018-0788-4.
20. van der Zande MM, Dembinsky M, Aresi G, van Staa TP. General practitioners' accounts of negotiating antibiotic prescribing decisions with patients: a qualitative study on what influences antibiotic prescribing in low, medium and high prescribing practices. *BMC Fam Pract* 2019;20(1):172. doi: 10.1186/s12875-019-1065-x.
21. O'Doherty J, Leader LFW, O'Regan A, Dunne C, Puthooppambal SJ, O'Connor R. Over prescribing of antibiotics for acute respiratory tract infections; a qualitative study to explore Irish general practitioners' perspectives. *BMC Fam Pract* 2019;20(1):27. doi: 10.1186/s12875-019-0917-8.
22. Fletcher-Lartey S, Yee M, Gaarslev C, Khan R. Why do general practitioners prescribe antibiotics for upper respiratory tract infections to meet patient expectations: a mixed methods study. *BMJ Open* 2016;6(10):e012244. doi: 10.1136/bmjopen-2016-012244.
23. Rose J, Crosbie M, Stewart A. A qualitative literature review exploring the drivers influencing over-prescribing by GPs in primary care and recommendations to reduce unnecessary prescribing. *Perspect Public Health* 2019. [https://doi: 10.1177/1757913919879183](https://doi.org/10.1177/1757913919879183) (accessed 10 January 2020).
24. Sunde M, Nygaard MM, Høye S. General practitioners' attitudes towards municipal initiatives to improve antibiotic prescribing – a mixed-methods study. *Antibiotics (Basel)* 2019;8(3). doi: 10.3390/antibiotics8030120.
25. McKay R, Mah A, Law MR, McGrail K, Patrick DM. Systematic review of factors associated with antibiotic prescribing for respiratory tract infections. *Antimicrob Agents Chemother* 2016;60(7):4106-18. doi: 10.1128/AAC.00209-16.
26. McCullough AR, Rathbone J, Parekh S, Hoffmann TC, Del Mar CB. Not in my backyard: a systematic review of clinicians' knowledge and beliefs about antibiotic resistance. *J Antimicrob Chemother* 2015;70(9):2465-2473. doi: 10.1093/jac/dkv164.
27. Brookes-Howell L, Hook K, Cooper L, et al. Clinical influences on antibiotic prescribing decisions for lower respiratory tract infection: A nine country qualitative study of variation in care. *BMJ Open* 2012;2(3). doi: 10.1136/bmjopen-2011-000795.
28. Poss-Doering R, Kamradt M, Stuermlinger A, et al. The complex phenomenon of dysrational antibiotics prescribing decisions in German primary healthcare: a qualitative interview study

- using dual process theory. *Antimicrob Resist Infect Control* 2020;9. doi: 10.1186/s13756-019-0664-6.
29. Wood F, Phillips C, Brookes-Howell L, et al. Primary care clinicians' perceptions of antibiotic resistance: a multi-country qualitative interview study. *J Antimicrob Chemother* 2013;68(1):237-243. doi:10.1093/jac/dks338.
30. Simpson SA, Wood F, Butler CC. General practitioners' perception of antimicrobial resistance: a qualitative study. *J Antimicrob Chemother* 2007;59(2):292-296. doi: 10.1093/jac/dkl467.
31. Centers for Disease Control and Prevention. Outpatient antibiotic prescriptions – United States, 2017. <https://www.cdc.gov/antibiotic-use/community/programs-measurement/state-local-activities/outpatient-antibiotic-prescriptions-US-2017.html> (accessed 10 January 2020).
32. Petterson S, McNellis R, Klink K, Meyers D, Bazemore A. The State of Primary Care in the United States: A Chartbook of Facts and Statistics. January 2018. <http://graham-center.org/content/dam/rgc/documents/publications-reports/reports/PrimaryCareChartbook.pdf> (accessed 10 January 2020).
33. Doty MM, Tikkanen R, Shah A, Schneider EC. Primary Care Physicians' Role in Coordinating Medical and Health-Related Social Needs in Eleven Countries. *Health Aff (Millwood)* 2020;39(1). <https://doi.org/10.1377/hlthaff.2019.01088> (accessed 10 January 2020).
34. O'Brian BC, Harris IB, Beckman TJ, Reed DA, Cook DA. Standards for reporting qualitative research: a synthesis of recommendations. *Acad Med* 2014;89(9):1245-1251.
35. Elo S, Kyngäs H. The qualitative content analysis process. *J Adv Nurs* 2008;62(1):107-115. doi:10.1111/j.1365-2648.2007.04569.x.
36. Bradley EH, Curry LA, Devers KJ. Qualitative data analysis for health services research: developing taxonomy, themes, and theory. *Health Serv Res* 2007;42(4):1758-72. doi: 10.1111/j.1475-6773.2006.00684.x.
37. de Bont EG, Peetoom KK, Moser A, Francis NA, Dinant GJ, Cals JW. Childhood fever: a qualitative study on GPs' experiences during out-of-hours care. *Fam Pract* 2015;32(4):449-55. doi: 10.1093/fampra/cmz029.
38. Teixeira Rodrigues A, Roque F, Falcão A, Figueiras A, Herdeiro MT. Understanding physician antibiotic prescribing behavior: a systematic review of qualitative studies. *Int J Antimicrob Agents* 2013;41(3):203-12. doi: 10.1016/j.ijantimicag.2012.09.003.
39. Björkman I, Berg J, Röing M, Erntell M, Lundborg CS. Perceptions among Swedish hospital physicians on prescribing of antibiotics and antibiotic resistance. *Qual Saf Health Care* 2010;19(6):e8. doi: 10.1136/qshc.2008.029199.
40. Krockow EM, Colman AM, Chattoe-Brown E, et al. Balancing the risks to individual and society: a systematic review and synthesis of qualitative research on antibiotic prescribing behavior in hospitals. *J Hosp Infect* 2019;101(4):428-439. doi: 10.1016/j.jhin.2018.08.007.
41. Feiring E, Walter AB. Antimicrobial stewardship: a qualitative study of the development of national guidelines for antibiotic use in hospitals. *BMC Health Serv Res* 2017;17(1):747. doi: 10.1186/s12913-017-2683-4.
42. Skodvin B, Aase K, Charani E, Holmes A, Smith I. An antimicrobial stewardship program initiative: a qualitative study on prescribing practices among hospital doctors. *Antimicrob Resist Infect Control* 2015;4:24. doi: 10.1186/s13756-015-0065-4.
43. Ratajczak M, Gold N, Hailstone S, Chadborn T. The effectiveness of repeating a social norm feedback intervention to high prescribers of antibiotics in general practice: a national



- 1  
2  
3 regression discontinuity design. *J Antimicrob Chemother* 2019;74(12):3603-3610. doi:  
4 10.1093/jac/dkz392.
- 5  
6 44. Bradley DT, Allen SE, Quinn H, Bradley B, Dolan M. Social norm feedback reduces primary  
7 care antibiotic prescribing in a regression discontinuity study. *J Antimicrob Chemother*  
8 2019;74(9):2797-2802. doi: 10.1093/jac/dkz222.
- 9  
10 45. Gulliford MC, Prevost AT, Charlton J, et al. Effectiveness and safety of electronically  
11 delivered prescribing feedback and decision support on antibiotic use for respiratory illness  
12 in primary care: REDUCE cluster randomized trial. *BMJ* 2019;364. doi: 10.1136/bmj.1236.
- 13  
14 46. Hallsworth M, Chadborn T, Sallis A, et al. Provision of social norm feedback to high  
15 prescribers of antibiotics in general practice: a pragmatic national randomized controlled  
16 trial. *Lancet* 2016;387(10029):1743-52. doi: 10.1016/S0140-6736(16)00215-4.
- 17  
18 47. Gerber JS, Prasad PA, Fiks AG, et al. Durability of benefits of an outpatient antimicrobial  
19 stewardship intervention after discontinuation of audit and feedback. *JAMA*  
20 2014;312(23):2569-70. doi: 10.1001/jama.2014.14042.
- 21  
22 48. Zickafoose JS, Ireys HT, Swinburn A, Simpson LA. Primary Care Physicians' Experiences  
23 With and Attitudes Toward Pediatric Quality Reporting. *Acad Pediatr* 2016;16(8):750-759.  
24 doi:10.1016/j.acap.2016.07.005.
- 25  
26 49. Federman AD, Keyhani S. Physicians' participation in the Physician' Quality Reporting  
27 Initiative and their perceptions of its impact on quality of care. *Health Policy* 2011;102(2-  
28 3):229-234. doi:10.1016/j.healthpol.2011.05.003.
- 29  
30 50. Lester H, Matharu T, Mohammed MA, Lester D, Foskett-Tharby R. Implementation of pay  
31 for performance in primary care: a qualitative study 8 years after introduction. *Br J Gen  
32 Pract* 2013;63(611):e408-15. doi: 10.3399/bjgp13X668203.
- 33  
34 51. Maisey S, Steel N, Marsh R, et al. Effects of payment for performance in primary care:  
35 qualitative interview study. *J Health Serv Res Policy* 2008;13(3):133-9. doi:  
36 10.1258/jhsrp.2008.007118.
- 37  
38 52. Liao JM, Schapira MS, Navanthe AS, et al. The effect of emphasizing patient, societal, and  
39 institutional harms of inappropriate antibiotic prescribing on physician support of financial  
40 penalties: A randomized trial. *Ann Intern Med* 2017;167(3):215-216. doi: 10.7326/L17-0102.
- 41  
42 53. Brown JD. Evaluations of Self and Others: Self-Enhancement Biases in Social Judgments.  
43 *Soc Cogn* 1986;4(4):353-376. doi: 10.1521/soco.1986.4.4.353.
- 44  
45 54. John OP, Robins RW. Accuracy and bias in self-perception: individual differences in self-  
46 enhancement and the role of narcissism. *J Pers Soc Psychol* 1994;66(1):206-219. doi:  
47 10.1037/0022-3514.66.1.206.
- 48  
49 55. Meeker D, Linder JA, Fox CR, et al. Effects of Behavioral Interventions on Inappropriate  
50 Antibiotic Prescribing Among Primary Care Practices: A Randomized Clinical Trial. *JAMA*  
51 2016;315(6):562-70. doi:10.1001/jama.2016.0275.
- 52  
53 56. Linder JA, Meeker D, Fox CR, et al. Effects of Behavioral Interventions on Inappropriate  
54 Antibiotic Prescribing in Primary Care 12 Months After Stopping Interventions. *JAMA*  
55 2017;318(14):1391-1392. doi:10.1001/jama.2017.11152.
- 56  
57  
58  
59  
60

**Table 1. Themes and quotations from primary care physicians regarding antibiotic resistance as a public health issue**

| Themes                                                                                                               | Quotations                                                                                                                                                                                                                                                                                                                                                                                                                                                                                                                                                                                                                                                                                                                                                                                                                                                                                                                                                                                         |
|----------------------------------------------------------------------------------------------------------------------|----------------------------------------------------------------------------------------------------------------------------------------------------------------------------------------------------------------------------------------------------------------------------------------------------------------------------------------------------------------------------------------------------------------------------------------------------------------------------------------------------------------------------------------------------------------------------------------------------------------------------------------------------------------------------------------------------------------------------------------------------------------------------------------------------------------------------------------------------------------------------------------------------------------------------------------------------------------------------------------------------|
| <i>Antibiotic resistance seen as less important than other public health issues faced by primary care physicians</i> | <p>(1) “We are seeing some MRSA. Everybody does. It is just so low on the totem pole compared to the other things that we are seeing. – Birmingham, family medicine/internal medicine physician</p> <p>(2) “It’s important, but in everyday practice I thought that other things were more important.” – Chicago, pediatrician</p>                                                                                                                                                                                                                                                                                                                                                                                                                                                                                                                                                                                                                                                                 |
| <i>Antibiotic resistance is an issue, but not for my patient population</i>                                          | <p>(1) “I thought about antibiotic resistance as more of a problem, not in my practice that much, but in a hospital with a very sick person where they can’t find something because somebody’s resistant.” – Chicago, pediatrician</p> <p>(2) “It’s not like I’m seeing my patients having an issue on a regular basis like these other things are. There’s this threat of this crazy super bug that will take over the world and kill us all, but I’ve never – it doesn’t seem like reality. – Philadelphia, family medicine/internal medicine physician</p> <p>(3) “We’re starting to see it in the community. I think if you had a table full of infectious disease doctors working in intensive care units, you would have different priorities. But in the outpatient, we probably see it less [...] It is a matter of time before we see it more. Who knows, a year, two, three from now, these numbers might be different.” – Philadelphia, family medicine/internal medicine physician</p> |

**Table 2. Themes and quotations from primary care physicians regarding drivers antibiotic prescribing**

| Themes                                                               | Quotations                                                                                                                                                                                                                                                                                                                                                                                                                                                                                                                                                                                                                                                                                                                                                                                                                                                                     |
|----------------------------------------------------------------------|--------------------------------------------------------------------------------------------------------------------------------------------------------------------------------------------------------------------------------------------------------------------------------------------------------------------------------------------------------------------------------------------------------------------------------------------------------------------------------------------------------------------------------------------------------------------------------------------------------------------------------------------------------------------------------------------------------------------------------------------------------------------------------------------------------------------------------------------------------------------------------|
| <i>Attribution of inappropriate antibiotic prescribing to others</i> | <p>(1) “I think those of us who have our own practice and control of things probably [...] ‘get it’ more than the hourly non-vested person in your walk-in clinics who are just basically drawing an hourly salary and their whole interest is in just getting rid of somebody.” – Birmingham, family medicine/internal medicine physician</p> <p>(2) “We’re always practicing evidence-based medicine, so it becomes incredibly challenging. With adult medicine, they’ll give out antibiotics over the phone, antibiotics without doing swabs and chest X-rays, things like that, or even seeing the patient.” – Chicago, pediatrician</p> <p>(3) “A lot of us don’t like to prescribe antibiotics, but they go to urgent cares and they go to [...] one-minute clinics and they get prescribed antibiotics.” – Los Angeles, family medicine/internal medicine physician</p> |
| <i>Patient demand as a driving factor</i>                            | <p>(1) “We’re under pressure all day. You don’t want to get written up, potentially, for being insensitive, or not taking care of them, or physician ratings.” – Birmingham, pediatrician</p> <p>(2) “They come in and it’s a boxing match. You are fighting in that corner with the misconception, preconceived notion and you’re trying to tell them that 2 + 2 = 4 and they are saying, “No, it’s purple”. – Birmingham, family medicine/internal medicine physician</p> <p>(3) “Sometimes you just like, you know what, I’m beaten down; so, here’s your Z-Pak. See you. Next patient. I’m not going to sit here and argue with somebody for five minutes over why they don’t need it.” – Philadelphia, family medicine/internal medicine physician</p>                                                                                                                    |

**Table 3. Themes and quotations from primary care physicians regarding patient and**

**physician education as antibiotic stewardship activities**

| <b>Themes</b>                               | <b>Quotations</b>                                                                                                                                                                                                                                                                                                                                                                                                                                                                                                                                                                                                                                |
|---------------------------------------------|--------------------------------------------------------------------------------------------------------------------------------------------------------------------------------------------------------------------------------------------------------------------------------------------------------------------------------------------------------------------------------------------------------------------------------------------------------------------------------------------------------------------------------------------------------------------------------------------------------------------------------------------------|
| <i>Need for patient education</i>           | <p>(1) “It will not work unless you educate the population. You cannot attack the doctors and curtail what they are doing until you educate patients that your doctor is doing the right thing.” – Birmingham, family medicine/internal medicine physician</p> <p>(2) “I think it’s more education. I think you could probably do more with a commercial than you can with anything else.” – Chicago, pediatrician</p>                                                                                                                                                                                                                           |
| <i>Acceptability of physician education</i> | <p>(1) “Parents are going to ask. They don’t know what’s right or wrong. They’re not medically trained. It’s the physicians that need more education about not prescribing.” – Chicago, pediatrician</p> <p>(2) “I think the best education strategy we could get and maybe there could be a study done is how, what is the best way to communicate to patients that antibiotic overprescribing and resistance is a problem and that rings true to them, that we can tell them this and they’re going to understand that and accept the fact that it didn’t lead to antibiotics.” – Los Angeles, family medicine/internal medicine physician</p> |

**Table 4. Themes and quotations from primary care physicians regarding the acceptability of performance reporting**

|                                                                   |                                                                                                                                                                                                                                                                                                                                                                                                                                                                                                                                                                                                                                                                                                                                                                                                                                                                                   |
|-------------------------------------------------------------------|-----------------------------------------------------------------------------------------------------------------------------------------------------------------------------------------------------------------------------------------------------------------------------------------------------------------------------------------------------------------------------------------------------------------------------------------------------------------------------------------------------------------------------------------------------------------------------------------------------------------------------------------------------------------------------------------------------------------------------------------------------------------------------------------------------------------------------------------------------------------------------------|
| <p><i>Feasibility of measuring antibiotic prescribing</i></p>     | <p>(1) “Like I said, you’ll get patients who were seen within hours by 2 different people, and one gives the antibiotic and the other one doesn’t. It’s not necessarily that the person who doesn’t give it is always right, and the other one’s always wrong. It’s too subjective.” – Chicago, pediatrician</p> <p>(2) “There’s more thought process into the physician having to, there’s a reason basically why a physician chooses or not chooses to, the management specifically. So, until they actually come and look at our, the history, the physical, and overall clinical management, they really will not know why we prescribed the way we did it.” – Los Angeles, family medicine/internal medicine physician</p>                                                                                                                                                   |
| <p><i>Belief that physicians will “game the system”</i></p>       | <p>(1) “As soon as you start having measurements like that, you’re going to have a lot more diagnoses of walking pneumonia or pneumonia.” – Los Angeles, family medicine/internal medicine physician</p> <p>(2) “People don’t put down accurate diagnoses, and then when you have something like this, then everyone is going to start gaming the system. ‘I’m not going to put down diagnosis of bronchitis. No, I’m going to put sinusitis.’ Even through it’s bronchitis, I can give you the antibiotic and not get dinged for it.” – Philadelphia, family medicine/internal medicine physician</p>                                                                                                                                                                                                                                                                            |
| <p><i>Dissatisfaction with the quality measurement system</i></p> | <p>(1) “These days we’re all getting measured on everything. Every time we click a button on the EMR whether it’s diabetes, cholesterol, blood pressure, antibiotic prescribing, no matter what it is someone’s measuring it. Someone’s telling us what we should be doing. I think, I’ll speak for myself; physicians are starting to get tired of being told what to do.” – Philadelphia, family medicine/internal medicine physician</p> <p>(2) “That’s going to fall into a P for P program. A payment for performance which is the insurance company’s way of paying doctors less money.” – Los Angeles, pediatrician</p> <p>(3) “We’ve discovered that they don’t work very well, and then, almost always if there’s an incentive for doing something, there’s going to be a punishment for not doing it. There’s never just the incentive.” – Birmingham, pediatrician</p> |
| <p><i>Distrust of tracking and reporting systems</i></p>          | <p>(1) “For example, I vaccinate every kid that comes to see me with Menactra [...] [Insurance company] recently said that I did not get 23 kids, but when I go to the state registry, every single one of those kids got their Menactra, before the age of 13. Their data collection practices are questionable and manipulable, and I don’t trust it.” – Birmingham, pediatrician</p>                                                                                                                                                                                                                                                                                                                                                                                                                                                                                           |

1  
2  
3  
4  
5  
6  
7  
8  
9  
10  
11  
12  
13  
14  
15  
16  
17  
18  
19  
20  
21  
22  
23  
24  
25  
26  
27  
28  
29  
30  
31  
32  
33  
34  
35  
36  
37  
38  
39  
40  
41  
42  
43  
44  
45  
46  
47  
48  
49  
50  
51  
52  
53  
54  
55  
56  
57  
58  
59  
60

|                                                                                                                                                                                                                                                                                                                                     |
|-------------------------------------------------------------------------------------------------------------------------------------------------------------------------------------------------------------------------------------------------------------------------------------------------------------------------------------|
| (2) “The quality of the data seems always so poor [...] I have patients that I’ve never seen that are on my list, I had a patient that was dead for 2 years that was on my list. So the quality of the data collection and how you’re going to do that is so important.” – Los Angeles, family medicine/internal medicine physician |
|-------------------------------------------------------------------------------------------------------------------------------------------------------------------------------------------------------------------------------------------------------------------------------------------------------------------------------------|

For peer review only

# Reporting checklist for qualitative study.

Based on the SRQR guidelines.

## Instructions to authors

Complete this checklist by entering the page numbers from your manuscript where readers will find each of the items listed below.

Your article may not currently address all the items on the checklist. Please modify your text to include the missing information. If you are certain that an item does not apply, please write "n/a" and provide a short explanation.

Upload your completed checklist as an extra file when you submit to a journal.

In your methods section, say that you used the SRQR reporting guidelines, and cite them as:

O'Brien BC, Harris IB, Beckman TJ, Reed DA, Cook DA. Standards for reporting qualitative research: a synthesis of recommendations. *Acad Med.* 2014;89(9):1245-1251.

|                     | Reporting Item                                                                                                                                                                                                                                          | Page Number |
|---------------------|---------------------------------------------------------------------------------------------------------------------------------------------------------------------------------------------------------------------------------------------------------|-------------|
| <b>Title</b>        |                                                                                                                                                                                                                                                         |             |
|                     | <a href="#">#1</a> Concise description of the nature and topic of the study identifying the study as qualitative or indicating the approach (e.g. ethnography, grounded theory) or data collection methods (e.g. interview, focus group) is recommended | 1           |
| <b>Abstract</b>     |                                                                                                                                                                                                                                                         |             |
|                     | <a href="#">#2</a> Summary of the key elements of the study using the abstract format of the intended publication; typically includes background, purpose, methods, results and conclusions                                                             | 2-3         |
| <b>Introduction</b> |                                                                                                                                                                                                                                                         |             |
| Problem formulation | <a href="#">#3</a> Description and significance of the problem / phenomenon studied: review of relevant theory and empirical work; problem statement                                                                                                    | 4-6         |

|    |                           |                     |                                                           |         |
|----|---------------------------|---------------------|-----------------------------------------------------------|---------|
| 1  | Purpose or research       | <a href="#">#4</a>  | Purpose of the study and specific objectives or           | 6       |
| 2  | question                  |                     | questions                                                 |         |
| 3  |                           |                     |                                                           |         |
| 4  | <b>Methods</b>            |                     |                                                           |         |
| 5  |                           |                     |                                                           |         |
| 6  |                           |                     |                                                           |         |
| 7  | Qualitative approach and  | <a href="#">#5</a>  | Qualitative approach (e.g. ethnography, grounded          | 6-7, 20 |
| 8  | research paradigm         |                     | theory, case study, phenomenology, narrative              |         |
| 9  |                           |                     | research) and guiding theory if appropriate; identifying  |         |
| 10 |                           |                     | the research paradigm (e.g. postpositivist,               |         |
| 11 |                           |                     | constructivist / interpretivist) is also recommended;     |         |
| 12 |                           |                     | rationale. The rationale should briefly discuss the       |         |
| 13 |                           |                     | justification for choosing that theory, approach,         |         |
| 14 |                           |                     | method or technique rather than other options             |         |
| 15 |                           |                     | available; the assumptions and limitations implicit in    |         |
| 16 |                           |                     | those choices and how those choices influence study       |         |
| 17 |                           |                     | conclusions and transferability. As appropriate the       |         |
| 18 |                           |                     | rationale for several items might be discussed            |         |
| 19 |                           |                     | together.                                                 |         |
| 20 |                           |                     |                                                           |         |
| 21 |                           |                     |                                                           |         |
| 22 |                           |                     |                                                           |         |
| 23 |                           |                     |                                                           |         |
| 24 |                           |                     |                                                           |         |
| 25 |                           |                     |                                                           |         |
| 26 |                           |                     |                                                           |         |
| 27 | Researcher                | <a href="#">#6</a>  | Researchers' characteristics that may influence the       | 7       |
| 28 | characteristics and       |                     | research, including personal attributes, qualifications / |         |
| 29 | reflexivity               |                     | experience, relationship with participants,               |         |
| 30 |                           |                     | assumptions and / or presuppositions; potential or        |         |
| 31 |                           |                     | actual interaction between researchers'                   |         |
| 32 |                           |                     | characteristics and the research questions, approach,     |         |
| 33 |                           |                     | methods, results and / or transferability                 |         |
| 34 |                           |                     |                                                           |         |
| 35 |                           |                     |                                                           |         |
| 36 |                           |                     |                                                           |         |
| 37 |                           |                     |                                                           |         |
| 38 |                           |                     |                                                           |         |
| 39 | Context                   | <a href="#">#7</a>  | Setting / site and salient contextual factors; rationale  | 6-7     |
| 40 |                           |                     |                                                           |         |
| 41 | Sampling strategy         | <a href="#">#8</a>  | How and why research participants, documents, or          | 6-7     |
| 42 |                           |                     | events were selected; criteria for deciding when no       |         |
| 43 |                           |                     | further sampling was necessary (e.g. sampling             |         |
| 44 |                           |                     | saturation); rationale                                    |         |
| 45 |                           |                     |                                                           |         |
| 46 |                           |                     |                                                           |         |
| 47 |                           |                     |                                                           |         |
| 48 | Ethical issues pertaining | <a href="#">#9</a>  | Documentation of approval by an appropriate ethics        | 8       |
| 49 | to human subjects         |                     | review board and participant consent, or explanation      |         |
| 50 |                           |                     | for lack thereof; other confidentiality and data security |         |
| 51 |                           |                     | issues                                                    |         |
| 52 |                           |                     |                                                           |         |
| 53 |                           |                     |                                                           |         |
| 54 |                           |                     |                                                           |         |
| 55 | Data collection methods   | <a href="#">#10</a> | Types of data collected; details of data collection       | 8-9     |
| 56 |                           |                     | procedures including (as appropriate) start and stop      |         |
| 57 |                           |                     | dates of data collection and analysis, iterative          |         |
| 58 |                           |                     |                                                           |         |
| 59 |                           |                     |                                                           |         |
| 60 |                           |                     |                                                           |         |



process, triangulation of sources / methods, and modification of procedures in response to evolving study findings; rationale

|    |                              |                     |                                                          |
|----|------------------------------|---------------------|----------------------------------------------------------|
| 1  |                              |                     |                                                          |
| 2  |                              |                     |                                                          |
| 3  |                              |                     |                                                          |
| 4  |                              |                     |                                                          |
| 5  |                              |                     |                                                          |
| 6  | Data collection              | <a href="#">#11</a> | Description of instruments (e.g. interview guides,       |
| 7  | instruments and              |                     | questionnaires) and devices (e.g. audio recorders)       |
| 8  | technologies                 |                     | used for data collection; if / how the instruments(s)    |
| 9  |                              |                     | changed over the course of the study                     |
| 10 |                              |                     |                                                          |
| 11 |                              |                     |                                                          |
| 12 | Units of study               | <a href="#">#12</a> | Number and relevant characteristics of participants,     |
| 13 |                              |                     | documents, or events included in the study; level of     |
| 14 |                              |                     | participation (could be reported in results)             |
| 15 |                              |                     |                                                          |
| 16 |                              |                     |                                                          |
| 17 | Data processing              | <a href="#">#13</a> | Methods for processing data prior to and during          |
| 18 |                              |                     | analysis, including transcription, data entry, data      |
| 19 |                              |                     | management and security, verification of data            |
| 20 |                              |                     | integrity, data coding, and anonymisation /              |
| 21 |                              |                     | deidentification of excerpts                             |
| 22 |                              |                     |                                                          |
| 23 |                              |                     |                                                          |
| 24 |                              |                     |                                                          |
| 25 |                              |                     |                                                          |
| 26 | Data analysis                | <a href="#">#14</a> | Process by which inferences, themes, etc. were           |
| 27 |                              |                     | identified and developed, including the researchers      |
| 28 |                              |                     | involved in data analysis; usually references a specific |
| 29 |                              |                     | paradigm or approach; rationale                          |
| 30 |                              |                     |                                                          |
| 31 |                              |                     |                                                          |
| 32 |                              |                     |                                                          |
| 33 | Techniques to enhance        | <a href="#">#15</a> | Techniques to enhance trustworthiness and credibility    |
| 34 | trustworthiness              |                     | of data analysis (e.g. member checking, audit trail,     |
| 35 |                              |                     | triangulation); rationale                                |
| 36 |                              |                     |                                                          |
| 37 |                              |                     |                                                          |
| 38 | <b>Results/findings</b>      |                     |                                                          |
| 39 |                              |                     |                                                          |
| 40 | Syntheses and                | <a href="#">#16</a> | Main findings (e.g. interpretations, inferences, and     |
| 41 | interpretation               |                     | themes); might include development of a theory or        |
| 42 |                              |                     | model, or integration with prior research or theory      |
| 43 |                              |                     |                                                          |
| 44 |                              |                     |                                                          |
| 45 |                              |                     |                                                          |
| 46 | Links to empirical data      | <a href="#">#17</a> | Evidence (e.g. quotes, field notes, text excerpts,       |
| 47 |                              |                     | photographs) to substantiate analytic findings           |
| 48 |                              |                     |                                                          |
| 49 |                              |                     |                                                          |
| 50 | <b>Discussion</b>            |                     |                                                          |
| 51 |                              |                     |                                                          |
| 52 | Intergration with prior      | <a href="#">#18</a> | Short summary of main findings; explanation of how       |
| 53 | work, implications,          |                     | findings and conclusions connect to, support,            |
| 54 | transferability and          |                     | elaborate on, or challenge conclusions of earlier        |
| 55 | contribution(s) to the field |                     | scholarship; discussion of scope of application /        |
| 56 |                              |                     |                                                          |
| 57 |                              |                     |                                                          |
| 58 |                              |                     |                                                          |
| 59 |                              |                     |                                                          |
| 60 |                              |                     |                                                          |

generalizability; identification of unique contributions(s) to scholarship in a discipline or field

1  
2  
3  
4 Limitations [#19](#) Trustworthiness and limitations of findings 19-20

5  
6 **Other**

7  
8  
9 Conflicts of interest [#20](#) Potential sources of influence of perceived influence 20-21  
10 on study conduct and conclusions; how these were  
11 managed  
12

13  
14 Funding [#21](#) Sources of funding and other support; role of funders 20  
15 in data collection, interpretation and reporting  
16

17  
18 None The SRQR checklist is distributed with permission of Wolters Kluwer © 2014 by the Association  
19 of American Medical Colleges. This checklist can be completed online using  
20 <https://www.goodreports.org/>, a tool made by the [EQUATOR Network](#) in collaboration with  
21 [Penelope.ai](#)  
22  
23  
24  
25  
26  
27  
28  
29  
30  
31  
32  
33  
34  
35  
36  
37  
38  
39  
40  
41  
42  
43  
44  
45  
46  
47  
48  
49  
50  
51  
52  
53  
54  
55  
56  
57  
58  
59  
60

## Supplementary File #2

### Antibiotic Stewardship Moderator's Guide

*Modified format for manuscript submission*

#### 1. Introduction

- a. Background: mirrors, taps
- b. Introduction of moderator, participants: name, years in practice, practice size, practice ownership (physician vs. hospital-owned), personal ownership status (i.e., employee vs. full/part owner)

#### 2. Perceived Importance of Antibiotic Resistance as a Public Health Issue

- a. As physicians, you confront a myriad of public health issues that impact you and your patient care daily. I want to discuss some of those issues, so I can understand where your areas of greatest concerns are focused.
- b. Exercise #1

#### **Exercise #1**

Moderator will hand out Sheet A with the listing the following topics:

- Overweight and obesity
- Antibiotic resistance
- Misinformation about childhood vaccines (pediatricians only)
- Opioid abuse
- Diabetes
- Patient non-compliance with drug regimens
- Smoking and tobacco use

#### Questions

1. On your sheet, would you please rank the public health issue from most important to least important? Put a 1 next to the most important, 2 for the next most important, etc. to the least important of these topics.
2. Moderator goes around the room to get the scores, does a quick tally, and determines where antibiotic resistance falls within the list of public health issues.
3. Overall, most of you have put antibiotic resistance as X in the list. Tell me why you believe it is important. What are your concerns about antibiotic resistance in the near term, say in the next 2-3 years? What about the next 10 years? Why isn't it higher on the list? Do you think that in 10 years it will be higher on the list?

- c. What do you hear from colleagues and fellow physicians about antibiotic use and antibiotic resistance? Is it a subject of conversation when physicians get together? How much of an issue is it for you in your practice?

#### 3. Attitudes and Perceptions of Antibiotics

- a. When you are deciding whether or not to prescribe an antibiotic for a patient, what are some of the factors you consider? (e.g., confidence in diagnosis [viral vs. bacterial infection], side effects associated with antibiotic use, AE risks such as C. diff, public health concerns such as antibiotic resistance)
  - i. When patients present with ambiguous symptoms (i.e., ones that could be associated with bacterial or viral infections), do you see prescribing antibiotics for these patients as the safer option than doing nothing?
  - ii. How often do adverse events or side effects associated with antibiotic use override the benefit of prescribing the antibiotic?
  - iii. When those arise, what are your options for the patient?
- b. Do you talk to your patients about the potential adverse events before you decide to prescribe?
  - i. Is it more often the patient, or yourself who is concerned about adverse events?
- c. How often in the past two months have you spoken to patients about the appropriate use of antibiotics, efficacy, resistance?
- d. Have you denied anyone antibiotics in the past two months who wanted them?
  - i. Could you walk me through one of those conversations? For instance, if I am your patient, how would you talk to me about this?
  - ii. What motivates this discussion?
  - iii. How often does the issue of antibiotic overuse, or antibiotic resistance come up in these discussions?
  - iv. How long, on average, does this type of discussion take? How much pushback do you receive from patients?

#### 4. Antibiotic Stewardship Definition

- a. Exercise #3

##### **Exercise #3**

Please write down on your pad, what antibiotic stewardship means to you. Even if it's not a term you're familiar with, just jot down a sentence about what you believe it means.

Moderator will go around the room and have each participant read aloud their definition, if they have one. Moderator will then provide the following definition (verbally and in writing):

“Activities that aim to ensure that antibiotics are used only when indicated and, when needed, that the most appropriate antibiotic is prescribed at the right dose and duration of therapy.”

Question: Do you have any thoughts on that?

- b. Exercise #4

##### **Exercise #4**

Moderator will hand out Sheet B

1  
2  
3  
4  
5  
6  
7  
8  
9  
10  
11  
12  
13  
14  
15  
16  
17  
18  
19  
20  
21  
22  
23  
24  
25  
26  
27  
28  
29  
30  
31  
32  
33  
34  
35  
36  
37  
38  
39  
40  
41  
42  
43  
44  
45  
46  
47  
48  
49  
50  
51  
52  
53  
54  
55  
56  
57  
58  
59  
60

Questions:

1. Do these data match with your thoughts about antibiotic resistance?
2. What matches what you believe? What is different?
3. Do these points make sense to you as the basic tenets of antibiotic stewardship? Do you think there is anything that shouldn't be these? Anything that is missing?

5. Elements of Antibiotic Stewardship (15 minutes)

a. Exercise #5

**Exercise #5**

Moderator will hand out modified versions of pages 16-24 of the Centers for Disease Control and Prevention's Core Elements of Outpatient Antibiotic Stewardship (<https://www.cdc.gov/antibiotic-use/community/improving-prescribing/core-elements/core-outpatient-stewardship.html>).

Questions:

1. I'm going to hand out some pages from the Elements of Antibiotic Stewardship. I know this is quite a bit to go through. If you will please read through this – focus on the bolded sentence and just scan the text below it. As you are reading, circle the phrases or sentences that attract you to the activity, that increase your interest in participating. If you would also cross out any phrases or sentences that you think would present a problem for you, be obstacles or would decrease your interest in the program.
2. For each element, moderator will ask for (1) Overall reaction; (2) What areas did you like – what was circled; (3) What areas did you think were obstacles or that you disliked?

6. Current/Past Stewardship or Quality Improvement Activities (15 minutes)

- a. Are you doing any kind of stewardship or quality improvement activities in your practice currently related to antibiotic prescribing or treatment, or any other disease area quality improvement activities?
  - i. Describe those to me.
  - ii. If no antibiotic related QA activities – probe for other areas of QA activities. In descriptions, include things like data collection, analysis, interpretation, personnel used, outside consulting used, design and implementation of activities, outcomes, cost and funding.
- b. In your practice, is there dedicated or protected time to perform quality improvement activities? This is for any area, not just antibiotics.
- c. Is there any dedicated expertise on staff for quality improvement activities? (probe if needed: like a data analyst)
- d. Is there any dedicated funding for quality improvement activities?
- e. What is your motivation for implementing quality improvement activities?

1  
2  
3  
4  
5  
6  
7  
8  
9  
10  
11  
12  
13  
14  
15  
16  
17  
18  
19  
20  
21  
22  
23  
24  
25  
26  
27  
28  
29  
30  
31  
32  
33  
34  
35  
36  
37  
38  
39  
40  
41  
42  
43  
44  
45  
46  
47  
48  
49  
50  
51  
52  
53  
54  
55  
56  
57  
58  
59  
60

7. Tools for Adoption of Antibiotic Stewardship (15 minutes)

a. Exercise #6

**Exercise #6**

Moderator will hand out Sheet C

Questions:

1. On this sheet I have listed a number of the issues we have discussed. I'd like you to think about your own practice and for each of the items, check whether you have access to each potential tool. If you do have access to a tool, please indicated whether you currently use this tool to support antibiotic stewardship activities and make a few notes as to why you do or don't. If you do not have access to a tool, please indicate the level of burden it would be to develop this tool for your practice.
2. Moderator will go around the room and determine the top two or three tools to discuss.
3. For each: What makes this tool such as big burden? What are some ideas you have that might help with this? Do you think it would be a serious impediment to implementing antibiotic stewardship?

8. Policies/Tools to Encourage the Adoption of Antibiotic Stewardship (15 minutes)

a. Exercise #7

**Exercise #7**

Moderator will hand out Sheet D

Questions:

1. There are a number of potential resources to support your efforts in the appropriate use of antibiotics. I'm going to hand out a list that I'd like you to read. Next to each item in the list is a rating scale of 1 to 5. Please check the box for each resource that describes how motivating each of these is for you. 1 means not at all useful. 5 means very useful. You can use any number in between. When you're done, we'll discuss it.
2. Moderator will collect the ratings and run a quick tally. Discussion will then start with the statement that is most motivating and work down from there.
3. Statement X has the greatest number of you giving it a high score. Those of you that gave it a high score, tell me what about X is the most useful. Are there any problem with it? (Moderator will then continue on for each of the 8 remaining statements.)
4. Is there anything that isn't on this list that you have seen utilized for other quality improvement programs that you think might be effective here?

- 1  
2  
3 b. Realistically, without external aid/requirements, what is the likelihood of your adopting  
4 voluntary antibiotic stewardship activities? (defined as having the elements discussed  
5 previously: data tracking and reporting, development and implementation of improvement  
6 activities, education/training of providers and staff, etc.)  
7  
8 c. Do patient satisfaction scores influence your decision-making around prescribing  
9 antibiotics? What kind and how much of an impact do they have?  
10  
11 d. If you wanted to implement antibiotic stewardship activities in your practice, or just  
12 improve your antibiotic prescribing, what do you think would be helpful to you?  
13 i. Toolkits on how to implement antibiotic stewardship interventions?  
14 ii. Feedback on antibiotic prescribing patterns in your area/practice?  
15 iii. Incentives from payers?  
16 iv. Other?  
17

18 9. Quality Measures for Appropriate Antibiotic Use (10 minutes)  
19

- 20 a. Our last subject today is quality measures. How familiar would you say you are with the  
21 Healthcare Effectiveness Data and Information Set (HEDIS) published by the National  
22 Committee for Quality Assurance (NCQA).  
23 i. For antibiotics, other disease areas?  
24 ii. Do you report HEDIS measures related to antibiotic use as part of your quality  
25 reporting?  
26 iii. Do you believe that these measures appropriately capture your antibiotic prescribing  
27 practices? Is the HEDIS measure accurate for your practice? (e.g., Bronchitis (adults)  
28 and upper respiratory infections (children)) If the participants indicate they do not  
29 think these measures accurately capture their prescribing, ask what would be needed  
30 for them to trust these data?  
31  
32 b. At your practice, are there direct/individual financial incentives for you – i.e., bonuses –  
33 tied to your performance on quality measures (antibiotics or otherwise)? In your opinion,  
34 do they work?  
35  
36 c. If antibiotic use quality measures were among the measures you can choose from to report  
37 to public (CMS) or private health plans as part of quality reporting requirements, how likely  
38 is it that you will select antibiotic quality measures vs. other quality measures?  
39  
40

41 10. Thank and end group  
42

43 **Sheet A**  
44

45

|                                                                 | Ranking 1-6<br>1 = most important<br>6 = least important |
|-----------------------------------------------------------------|----------------------------------------------------------|
| A. Overweight and Obesity                                       |                                                          |
| B. Opioid Abuse                                                 |                                                          |
| C. Antibiotic Resistance                                        |                                                          |
| D. Misinformation About Childhood Vaccines (pediatricians only) |                                                          |
| E. Diabetes                                                     |                                                          |

46  
47  
48  
49  
50  
51  
52  
53  
54  
55  
56  
57  
58  
59  
60

|                                              |  |
|----------------------------------------------|--|
| F. Patient Non-Compliance with Drug Regimens |  |
| G. Smoking and Tobacco Use                   |  |

**Sheet B**

According to the CDC, antibiotic resistance is among the greatest public health threats today.

- Leading to an estimated 12 million infections and 23,000 deaths per year in the US.

The most important modifiable risk factor for antibiotic resistance is inappropriate prescribing of antibiotics.

- Approximately half of outpatient prescribing in humans might be inappropriate including:
  - Antibiotic selection
  - Dosing or duration
  - Unnecessary antibiotic prescribing
- Estimates are that at least 30% of outpatient antibiotic prescriptions in the US are unnecessary.

Antibiotic stewardship is the effort

- To measure antibiotic prescribing
- To improve antibiotic prescribing by clinicians and use by patients so that antibiotics are only prescribed and used when needed
- To minimize misdiagnoses or delayed diagnoses leading to underuse of antibiotics
- To ensure that the right drug, dose, and duration are selected when an antibiotic is needed

**Sheet C**

| Potential tools available to use antibiotics more effectively  | Currently have access to this | If you have access, are you currently using this tool to support antibiotic stewardship efforts? Why/why not? | If you do not have access, how much of a burden would it be to develop this type of tool for your practice?            |
|----------------------------------------------------------------|-------------------------------|---------------------------------------------------------------------------------------------------------------|------------------------------------------------------------------------------------------------------------------------|
| 1. Timely, Accurate Feedback Reports on Antibiotic Prescribing |                               |                                                                                                               | <input type="checkbox"/> Not a burden<br><input type="checkbox"/> Some burden<br><input type="checkbox"/> Large burden |



|                                                                                                                    |  |  |                                                                                                                        |
|--------------------------------------------------------------------------------------------------------------------|--|--|------------------------------------------------------------------------------------------------------------------------|
| 2. Information on antibiotic adverse effects seen in your patients                                                 |  |  | <input type="checkbox"/> Not a burden<br><input type="checkbox"/> Some burden<br><input type="checkbox"/> Large burden |
| 3. Reports from electronic health records on antibiotic prescribing practices.                                     |  |  | <input type="checkbox"/> Not a burden<br><input type="checkbox"/> Some burden<br><input type="checkbox"/> Large burden |
| 4. Clinical decision support tools for antibiotic prescribing/ diagnosis aids that leads to antibiotic prescribing |  |  | <input type="checkbox"/> Not a burden<br><input type="checkbox"/> Some burden<br><input type="checkbox"/> Large burden |
| 5. Patient triage system                                                                                           |  |  | <input type="checkbox"/> Not a burden<br><input type="checkbox"/> Some burden<br><input type="checkbox"/> Large burden |
| 6. Access to experts in infectious diseases, pharmacy, quality improvement practices                               |  |  | <input type="checkbox"/> Not a burden<br><input type="checkbox"/> Some burden<br><input type="checkbox"/> Large burden |
| 7. Access to physician education/ training materials on antibiotic prescribing                                     |  |  | <input type="checkbox"/> Not a burden<br><input type="checkbox"/> Some burden<br><input type="checkbox"/> Large burden |
| 8. Access to materials for patient education on appropriate use of antibiotics                                     |  |  | <input type="checkbox"/> Not a burden<br><input type="checkbox"/> Some burden<br><input type="checkbox"/> Large burden |

### Sheet D

| Potential feedback loops on antibiotic use                                                                                                                                                                      | 1<br>Not at all<br>useful | 2 | 3 | 4 | 5<br>Very<br>useful |
|-----------------------------------------------------------------------------------------------------------------------------------------------------------------------------------------------------------------|---------------------------|---|---|---|---------------------|
| 1. If you received a letter from state department of health or health plan notifying your that you or your practice is a “high prescriber” of antibiotics when compared to other providers in your state/region |                           |   |   |   |                     |
| 2. If private health plans create a stand-alone quality incentive program for antibiotic stewardship                                                                                                            |                           |   |   |   |                     |

|                                                                                                                                                                                                         |  |  |  |  |  |
|---------------------------------------------------------------------------------------------------------------------------------------------------------------------------------------------------------|--|--|--|--|--|
| 3. If private health plans include antibiotic stewardship as a “menu item” for a quality incentive program                                                                                              |  |  |  |  |  |
| 4. If your state publicly recognizes practices/individuals that have demonstrated most appropriate antibiotic prescribing                                                                               |  |  |  |  |  |
| 5. If your state publicly publishes results of quality measures for appropriate antibiotic use for all practice locations                                                                               |  |  |  |  |  |
| 6. If your state department of health publishes aggregate data on the volume of outpatient antibiotic prescribing in your state                                                                         |  |  |  |  |  |
| 7. If your state publicly reports “high prescribing” practices                                                                                                                                          |  |  |  |  |  |
| 8. If you received a report card from state department of health or health plans that measure the rates of antibiotic adverse events for your patients compared to other providers in your state/region |  |  |  |  |  |
| 9. If you received a report card from state department of health or health plans on quality measures for antibiotics when compared to other providers in your state/region                              |  |  |  |  |  |
